# Supplementary material
Source: PubMed Central journal article supplement (PMC5603286)
Supplement: NIHMS875501-supplement-supplement.pdf [file NIHMS875501-supplement-supplement.pdf]

## Sanger Mouse Genetics Project participants

Agnieszka Swiatkowska, Amy Gates, Angela Green, Anna Karin Gerdin, Brendan Doe, Carl Shannon, Carmen Ballesteros Reviriego, Caroline Phipps, Caroline Sinclair, Catherine Ingle, Catherine McCarthy, Catherine Tudor, Cecilia Icoresi Mazzeo, Christopher Isherwood, Christopher Lelliott, Daniel Barrett, David Tino Lafont, Debarati Sethi, Ellen Brown, Emma Siragher, Evelina Miklejewska, Evelyn Grau, Fiona Kussy, Helen Kundi, Jacqueline White, Joanna Bottomley, Jonathan Burvill, Lauren Anthony, Mark Sanderson, Michael Woods, Monika Dabrowska, Radka Platte, Ramiro Ramirez-Solis, Selina Pearson, Simon Maguire, Susana Caetano, Tanya Bayzetinova, Valerie Vancollie & Yvette Hooks

Wellcome Trust Sanger Institute, Wellcome Genome Campus, Cambridge CB10 1SA, UK.

**SI Table 1 | Results of the experimental metastasis assay from stage 1 of the screen.** A mutant (Mut) mouse line progressed to stage 2 if the metastatic ratio was  $\leq 0.6$  or  $\geq 1.6$  and  $P \leq 0.0175$  (Mann-Whitney test), and additional cohorts were tested. Where multiple cohorts were tested: (i) data is shown for the results from the first cohort, (ii) those with a significant results by Integrative Data Analysis ( $P < 0.01$ ) are in red/green font (depending if decreased/increased metastasis), and (iii) those without significant results by Integrative Data Analysis ( $P > 0.01$ ) are in blue font.  $P$ - and  $U$ -value listed in the table is from a Mann-Whitney test. F, female; M, male; Mut, mutant; WT, wildtype.

| Mutated Gene  | <Allele>           | Background  | Genotype     | Sex | (mean) | (SD) | (n) | (mean) | (SD) | (n) | Mut/WT | P-value | U-value |
|---------------|--------------------|-------------|--------------|-----|--------|------|-----|--------|------|-----|--------|---------|---------|
| 1110037F02Rik | <tm1a(KOMP)Wtsi>   | C57BL/6NTac | Heterozygote | F   | 218    | 37   | 9   | 233    | 126  | 5   | 1.069  | 0.7972  | 20      |
| 1110059G10Rik | <tm1a(KOMP)Wtsi>   | C57BL/6NTac | Homozygote   | M   | 209    | 53   | 16  | 127    | 52   | 4   | 0.608  | 0.0261  | 8       |
| 1700001C02Rik | <tm1a(EUCOMM)Wtsi> | C57BL/6NTac | Homozygote   | F   | 245    | 67   | 21  | 202    | 96   | 4   | 0.824  | 0.335   | 28.5    |
| 1700007K13Rik | <tm1b(EUCOMM)Wtsi> | C57BL/6NTac | Homozygote   | M   | 112    | 34   | 10  | 113    | 11   | 4   | 1.009  | 0.8392  | 18      |
| 1700008O03Rik | <tm1a(KOMP)Wtsi>   | C57BL/6NTac | Homozygote   | F   | 260    | 52   | 18  | 265    | 96   | 4   | 1.019  | 0.6391  | 30      |
| 1700011A15Rik | <tm1a(KOMP)Wtsi>   | C57BL/6NTac | Homozygote   | M   | 147    | 36   | 17  | 130    | 39   | 5   | 0.884  | 0.3881  | 31      |
| 1700024P04Rik | <tm1b(EUCOMM)Wtsi> | C57BL/6NTac | Homozygote   | M   | 138    | 29   | 20  | 126    | 17   | 5   | 0.913  | 0.3079  | 34.5    |
| 1700029H14Rik | <tm2b(KOMP)Wtsi>   | C57BL/6NTac | Homozygote   | M   | 138    | 47   | 34  | 150    | 21   | 5   | 1.087  | 0.3662  | 63      |
| 1700034J05Rik | <tm1a(KOMP)Wtsi>   | C57BL/6NTac | Homozygote   | M   | 95     | 36   | 8   | 117    | 22   | 4   | 1.232  | 0.2337  | 8.5     |
| 1700042B14Rik | <tm1a(KOMP)Wtsi>   | C57BL/6NTac | Homozygote   | F   | 200    | 47   | 16  | 206    | 46   | 7   | 1.030  | 0.8128  | 48      |
| 1700067K01Rik | <tm2a(KOMP)Wtsi>   | C57BL/6NTac | Heterozygote | F   | 249    | 53   | 18  | 278    | 27   | 3   | 1.116  | 0.4212  | 18.5    |
| 1700112E06Rik | <tm1e(EUCOMM)Wtsi> | C57BL/6NTac | Homozygote   | F   | 191    | 36   | 17  | 168    | 46   | 4   | 0.880  | 0.3244  | 22.5    |
| 1700123O20Rik | <tm1a(EUCOMM)Wtsi> | C57BL/6NTac | Homozygote   | M   | 104    | 31   | 13  | 134    | 21   | 5   | 1.288  | 0.0607  | 13      |
| 2010300C02Rik | <tm1b(KOMP)Wtsi>   | C57BL/6NTac | Homozygote   | F   | 203    | 42   | 16  | 212    | 37   | 5   | 1.044  | 0.5629  | 32.5    |
| 2510003E04Rik | <tm1a(KOMP)Wtsi>   | C57BL/6NTac | Heterozygote | F   | 275    | 53   | 21  | 221    | 39   | 4   | 0.804  | 0.0879  | 18.5    |
| 2610029G23Rik | <tm1a(KOMP)Wtsi>   | C57BL/6NTac | Homozygote   | F   | 281    | 51   | 12  | 264    | 87   | 6   | 0.940  | 0.9253  | 34.5    |
| 2610034B18Rik | <tm1b(EUCOMM)Wtsi> | C57BL/6NTac | Homozygote   | F   | 125    | 41   | 24  | 136    | 22   | 4   | 1.088  | 0.6223  | 40      |
| 2610318N02Rik | <tm1b(EUCOMM)Wtsi> | C57BL/6NTac | Homozygote   | M   | 147    | 36   | 17  | 102    | 4    | 5   | 0.694  | 0.0148  | 11      |
| 2700029M09Rik | <em1Wtsi>          | C57BL/6NTac | Homozygote   | M   | 170    | 29   | 23  | 106    | 76   | 4   | 0.624  | 0.1806  | 22      |
| 2810417H13Rik | <tm1a(KOMP)Wtsi>   | C57BL/6NTac | Homozygote   | M   | 104    | 45   | 19  | 95     | 14   | 3   | 0.913  | 0.8107  | 25      |
| 3110035E14Rik | <tm1a(KOMP)Wtsi>   | C57BL/6NTac | Homozygote   | F   | 220    | 40   | 13  | 239    | 54   | 6   | 1.086  | 0.3125  | 27      |
| 3300002A11Rik | <tm1a(KOMP)Wtsi>   | C57BL/6NTac | Homozygote   | F   | 156    | 46   | 18  | 165    | 45   | 4   | 1.058  | 0.8646  | 33      |
| 3830406C13Rik | <tm1b(KOMP)Wtsi>   | C57BL/6NTac | Homozygote   | M   | 155    | 40   | 21  | 124    | 31   | 6   | 0.800  | 0.1082  | 35      |
| 3830417A13Rik | <tm1a(KOMP)Wtsi>   | C57BL/6NTac | Homozygote   | F   | 222    | 65   | 11  | 190    | 61   | 6   | 0.856  | 0.3146  | 22.5    |
| 4921536K21Rik | <tm1a(KOMP)Wtsi>   | C57BL/6NTac | Homozygote   | F   | 173    | 41   | 16  | 188    | 29   | 7   | 1.087  | 0.2554  | 38.5    |
| 4930404H24Rik | <tm1a(KOMP)Wtsi>   | C57BL/6NTac | Homozygote   | M   | 88     | 21   | 21  | 93     | 34   | 5   | 1.057  | 1       | 52      |
| 4930449E01Rik | <tm1a(KOMP)Wtsi>   | C57BL/6NTac | Homozygote   | M   | 137    | 32   | 19  | 129    | 19   | 5   | 0.942  | 0.7759  | 43      |
| 4930590J08Rik | <tm1a(EUCOMM)Wtsi> | C57BL/6NTac | Homozygote   | M   | 136    | 44   | 21  | 142    | 55   | 3   | 1.044  | 0.7269  | 27      |
| 4931429L15Rik | <tm1a(EUCOMM)Wtsi> | C57BL/6NTac | Homozygote   | M   | 97     | 39   | 22  | 50     | 23   | 6   | 0.515  | 0.0148  | 22      |
| 4932431P20Rik | <em1Wtsi>          | C57BL/6NTac | Homozygote   | M   | 88     | 21   | 21  | 84     | 29   | 5   | 0.955  | 0.6022  | 44      |
| 4933402N03Rik | <tm2a(KOMP)Wtsi>   | C57BL/6NTac | Homozygote   | M   | 196    | 57   | 15  | 158    | 63   | 3   | 0.806  | 0.4328  | 14      |
| 4933434E20Rik | <tm1a(EUCOMM)Wtsi> | C57BL/6NTac | Heterozygote | M   | 116    | 26   | 21  | 101    | 27   | 9   | 0.871  | 0.2131  | 66.5    |
| 5330434G04Rik | <em1Wtsi>          | C57BL/6NTac | Homozygote   | M   | 132    | 30   | 26  | 117    | 16   | 4   | 0.886  | 0.3928  | 37.5    |
| 5430421N21Rik | <tm1b(KOMP)Wtsi>   | C57BL/6NTac | Homozygote   | M   | 111    | 30   | 24  | 130    | 30   | 5   | 1.171  | 0.1839  | 36.5    |
| 5730559C18Rik | <tm2a(EUCOMM)Wtsi> | C57BL/6NTac | Homozygote   | M   | 137    | 44   | 18  | 145    | 53   | 8   | 1.058  | 0.8458  | 68      |
| 9130011E15Rik | <tm1a(EUCOMM)Wtsi> | C57BL/6NTac | Heterozygote | M   | 175    | 42   | 18  | 154    | 54   | 4   | 0.880  | 0.6702  | 30.5    |
| 9330182L06Rik | <tm1a(KOMP)Wtsi>   | C57BL/6NTac | Homozygote   | M   | 136    | 44   | 21  | 136    | 65   | 5   | 1.000  | 0.7946  | 48      |
| A430005L14Rik | <tm1a(KOMP)Wtsi>   | C57BL/6NTac | Homozygote   | F   | 270    | 52   | 19  | 302    | 38   | 4   | 1.119  | 0.3689  | 26.5    |
| A430078G23Rik | <tm1a(KOMP)Wtsi>   | C57BL/6NTac | Homozygote   | M   | 154    | 49   | 21  | 158    | 81   | 5   | 1.026  | 0.8452  | 49      |
| A730017C20Rik | <tm1b(KOMP)Wtsi>   | C57BL/6NTac | Homozygote   | M   | 72     | 29   | 23  | 79     | 10   | 4   | 1.097  | 0.5167  | 36      |
| A830019P07Rik | <tm1a(KOMP)Wtsi>   | C57BL/6NTac | Homozygote   | F   | 281    | 51   | 12  | 276    | 76   | 5   | 0.982  | 0.8741  | 28      |
| Abcb6         | <tm1a(KOMP)Wtsi>   | C57BL/6NTac | Homozygote   | F   | 190    | 56   | 12  | 184    | 55   | 4   | 0.968  | 0.7158  | 20.5    |
| Abhd14a       | <tm2a(EUCOMM)Wtsi> | C57BL/6NTac | Homozygote   | M   | 119    | 43   | 26  | 128    | 42   | 5   | 1.076  | 0.6288  | 55.5    |
| Abhd16a       | <tm1a(EUCOMM)Wtsi> | C57BL/6NTac | Heterozygote | M   | 153    | 40   | 21  | 147    | 46   | 5   | 0.961  | 0.974   | 51.5    |
| Abhd17a       | <tm1a(KOMP)Wtsi>   | C57BL/6NTac | Homozygote   | M   | 162    | 49   | 20  | 286    | 40   | 4   | 1.765  | 0.0022  | 0       |
| Abtb2         | <tm1a(KOMP)Wtsi>   | C57BL/6NTac | Homozygote   | M   | 210    | 48   | 10  | 187    | 72   | 4   | 0.890  | 0.7222  | 17      |
| Acaa1a        | <tm1a(KOMP)Wtsi>   | C57BL/6NTac | Homozygote   | F   | 277    | 62   | 11  | 239    | 107  | 4   | 0.863  | 1       | 21.5    |
| Acbd5         | <tm1b(EUCOMM)Wtsi> | C57BL/6NTac | Homozygote   | M   | 170    | 54   | 22  | 142    | 29   | 5   | 0.835  | 0.435   | 42      |
| Acer1         | <tm1a(KOMP)Wtsi>   | C57BL/6NTac | Homozygote   | M   | 294    | 51   | 10  | 133    | 26   | 5   | 0.452  | 0.0007  | 0       |
| Acot5         | <tm1a(KOMP)Wtsi>   | C57BL/6NTac | Homozygote   | F   | 213    | 54   | 14  | 134    | 28   | 4   | 0.629  | 0.0223  | 6       |

|          |                     |                                         |              |   |     |    |    |     |     |    |       |        |      |
|----------|---------------------|-----------------------------------------|--------------|---|-----|----|----|-----|-----|----|-------|--------|------|
| Actl10   | <tm1a(EUCOMM)Wtsi>  | C57BL/6NTac                             | Homozygote   | F | 133 | 40 | 32 | 102 | 9   | 3  | 0.767 | 0.0928 | 19   |
| Actn4    | <tm1a(EUCOMM)Wtsi>  | C57BL/6NTac                             | Heterozygote | M | 147 | 38 | 23 | 139 | 27  | 3  | 0.946 | 0.5464 | 26.5 |
| Actr6    | <tm1a(EUCOMM)Wtsi>  | C57BL/6NTac                             | Heterozygote | M | 245 | 65 | 3  | 321 | 52  | 3  | 1.310 | 0.4    | 2    |
| Adal     | <tm1a(EUCOMM)Wtsi>  | C57BL/6NTac                             | Homozygote   | M | 100 | 25 | 17 | 56  | 26  | 4  | 0.560 | 0.0137 | 6    |
| Adamts19 | <tm4a(EUCOMM)Wtsi>  | C57BL/6NTac                             | Homozygote   | M | 127 | 45 | 17 | 134 | 62  | 5  | 1.055 | 1      | 42   |
| Adamts3  | <tm1b(KOMP)Wtsi>    | C57BL/6NTac                             | Heterozygote | M | 170 | 50 | 28 | 163 | 28  | 5  | 0.959 | 0.6878 | 61.5 |
| Adap1    | <tm1a(EUCOMM)Wtsi>  | C57BL/6NTac                             | Homozygote   | F | 249 | 43 | 23 | 233 | 49  | 9  | 0.936 | 0.3773 | 82   |
| Adcy2    | <tm1a(KOMP)Wtsi>    | C57BL/6NTac                             | Homozygote   | M | 197 | 50 | 13 | 226 | 32  | 3  | 1.147 | 0.4178 | 13   |
| Adcy9    | <tm1b(EUCOMM)Wtsi>  | C57BL/6NTac                             | Heterozygote | M | 104 | 45 | 19 | 79  | 25  | 5  | 0.760 | 0.2129 | 29.5 |
| Adpgk    | <tm2a(EUCOMM)Wtsi>  | C57BL/6NTac                             | Homozygote   | F | 228 | 79 | 15 | 198 | 51  | 4  | 0.868 | 0.4525 | 22   |
| Aff3     | <tm1a(EUCOMM)Wtsi>  | C57BL/6NTac                             | Homozygote   | F | 260 | 52 | 18 | 207 | 95  | 4  | 0.796 | 0.3937 | 25.5 |
| Agap1    | <tm1a(EUCOMM)Wtsi>  | C57BL/6NTac                             | Heterozygote | M | 174 | 57 | 22 | 220 | 80  | 3  | 1.264 | 0.2574 | 19   |
| Ago3     | <tm1a(KOMP)Wtsi>    | C57BL/6NTac                             | Homozygote   | F | 233 | 58 | 17 | 212 | 66  | 5  | 0.910 | 0.5551 | 34.5 |
| Ahcy1    | <tm1a(EUCOMM)Wtsi>  | C57BL/6NTac                             | Homozygote   | F | 247 | 54 | 18 | 231 | 62  | 4  | 0.935 | 0.7013 | 31   |
| Aicda    | <tm1b(EUCOMM)Hgmua> | C57BL/6NTac                             | Homozygote   | M | 111 | 34 | 19 | 106 | 30  | 6  | 0.955 | 0.6791 | 50   |
| Akap9    | <tm1a(KOMP)Wtsi>    | C57BL/6Brd-Tyr, C57BL/6Dnk, C57BL/6NTac | Heterozygote | F | 216 | 80 | 12 | 233 | 33  | 6  | 1.079 | 0.3731 | 21   |
| Akr1c20  | <tm1a(KOMP)Wtsi>    | C57BL/6NTac                             | Homozygote   | M | 143 | 49 | 28 | 131 | 11  | 5  | 0.916 | 0.6333 | 60   |
| Akt2     | <tm1e(KOMP)Wtsi>    | 129S5                                   | Homozygote   | F | 223 | 54 | 5  | 214 | 85  | 4  | 0.960 | 0.9048 | 9    |
| Aldh1b1  | <tm2a(EUCOMM)Wtsi>  | C57BL/6NTac                             | Homozygote   | M | 114 | 24 | 9  | 109 | 29  | 4  | 0.956 | 0.6993 | 15   |
| Aldh3b1  | <tm1b(EUCOMM)Wtsi>  | C57BL/6NTac                             | Homozygote   | F | 216 | 60 | 15 | 203 | 42  | 10 | 0.940 | 0.3045 | 56   |
| Alox12e  | <tm1b(EUCOMM)Wtsi>  | C57BL/6NTac                             | Homozygote   | F | 219 | 49 | 19 | 170 | 41  | 6  | 0.776 | 0.0258 | 21.5 |
| Alpk1    | <em2Wtsi>           | C57BL/6NTac                             | Homozygote   | M | 152 | 57 | 24 | 180 | 30  | 5  | 1.184 | 0.3372 | 53   |
| Amz2     | <tm1e(KOMP)Wtsi>    | C57BL/6NTac                             | Homozygote   | M | 112 | 34 | 10 | 106 | 21  | 6  | 0.946 | 0.9567 | 29   |
| Anapc4   | <tm1a(EUCOMM)Wtsi>  | C57BL/6NTac                             | Heterozygote | M | 165 | 55 | 7  | 130 | 37  | 4  | 0.788 | 0.3152 | 8    |
| Ankrd13d | <tm1a(EUCOMM)Wtsi>  | C57BL/6NTac                             | Homozygote   | M | 116 | 26 | 21 | 113 | 49  | 4  | 0.974 | 0.824  | 38.5 |
| Ankrd6   | <tm1b(KOMP)Wtsi>    | C57BL/6NTac                             | Homozygote   | F | 166 | 45 | 16 | 222 | 24  | 4  | 1.337 | 0.0261 | 8    |
| Ankrd9   | <tm1(KOMP)Wtsi>     | C57BL/6NTac                             | Homozygote   | F | 299 | 67 | 13 | 288 | 81  | 5  | 0.963 | 0.8428 | 30   |
| Anks1b   | <tm1a(KOMP)Wtsi>    | C57BL/6NTac                             | Homozygote   | M | 113 | 42 | 17 | 155 | 25  | 3  | 1.372 | 0.1117 | 10   |
| Anks6    | <tm1b(KOMP)Wtsi>    | C57BL/6NTac                             | Heterozygote | M | 147 | 54 | 18 | 152 | 39  | 6  | 1.034 | 0.9734 | 53   |
| Ano10    | <tm1a(EUCOMM)Wtsi>  | C57BL/6NTac                             | Homozygote   | F | 185 | 48 | 16 | 192 | 26  | 7  | 1.038 | 0.8935 | 53.5 |
| Anxa6    | <tm1a(EUCOMM)Wtsi>  | C57BL/6NTac                             | Homozygote   | F | 170 | 34 | 19 | 145 | 34  | 6  | 0.853 | 0.1521 | 34   |
| Anxa9    | <tm1b(EUCOMM)Wtsi>  | C57BL/6NTac                             | Homozygote   | F | 270 | 52 | 19 | 278 | 31  | 5  | 1.030 | 0.8865 | 45   |
| Ap2a2    | <tm1b(EUCOMM)Wtsi>  | C57BL/6NTac                             | Homozygote   | M | 113 | 42 | 17 | 95  | 21  | 5  | 0.841 | 0.4558 | 32.5 |
| Ap4e1    | <tm1b(KOMP)Wtsi>    | C57BL/6NTac                             | Homozygote   | M | 153 | 51 | 19 | 112 | 23  | 4  | 0.732 | 0.1801 | 21   |
| Ap4m1    | <tm1b(EUCOMM)Wtsi>  | C57BL/6NTac                             | Homozygote   | F | 141 | 37 | 18 | 137 | 29  | 7  | 0.972 | 0.739  | 57   |
| Apip     | <tm1b(EUCOMM)Wtsi>  | C57BL/6NTac                             | Homozygote   | F | 228 | 79 | 15 | 224 | 46  | 6  | 0.982 | 0.7553 | 40.5 |
| Apol7a   | <tm1a(KOMP)Wtsi>    | C57BL/6NTac                             | Homozygote   | F | 133 | 37 | 10 | 158 | 24  | 3  | 1.188 | 0.4431 | 10   |
| Apol9b   | <tm2a(KOMP)Wtsi>    | C57BL/6NTac                             | Homozygote   | M | 149 | 46 | 20 | 122 | 26  | 8  | 0.819 | 0.1269 | 49.5 |
| Apoa     | <tm1b(KOMP)Wtsi>    | C57BL/6NTac                             | Homozygote   | M | 110 | 31 | 18 | 99  | 24  | 6  | 0.900 | 0.3332 | 39   |
| Apool    | <tm1a(KOMP)Wtsi>    | C57BL/6NTac                             | Homozygote   | M | 221 | 56 | 6  | 91  | 41  | 4  | 0.412 | 0.0095 | 0    |
| Arap2    | <tm2b(EUCOMM)Wtsi>  | C57BL/6NTac                             | Homozygote   | M | 120 | 48 | 15 | 102 | 22  | 6  | 0.850 | 0.6679 | 39   |
| Arhgap17 | <tm1b(EUCOMM)Wtsi>  | C57BL/6NTac                             | Homozygote   | M | 87  | 40 | 24 | 86  | 25  | 7  | 0.989 | 0.8686 | 80   |
| Arhgap22 | <tm1a(KOMP)Wtsi>    | C57BL/6NTac                             | Homozygote   | F | 196 | 56 | 20 | 197 | 41  | 4  | 1.005 | 0.8767 | 37.5 |
| Arhgef1  | <tm1a(EUCOMM)Wtsi>  | C57BL/6NTac                             | Homozygote   | M | 104 | 39 | 21 | 17  | 11  | 5  | 0.163 | 0.0007 | 0    |
| Arhgef38 | <tm1a(KOMP)Wtsi>    | C57BL/6NTac                             | Homozygote   | M | 266 | 53 | 13 | 254 | 73  | 4  | 0.955 | 1      | 25.5 |
| Arhgef7  | <tm1a(EUCOMM)Wtsi>  | C57BL/6NTac                             | Heterozygote | F | 144 | 46 | 18 | 130 | 14  | 4  | 0.903 | 0.7982 | 32.5 |
| Arid1b   | <tm1b(KOMP)Wtsi>    | C57BL/6NTac                             | Heterozygote | M | 83  | 29 | 26 | 37  | 16  | 5  | 0.446 | 0.0043 | 10   |
| Armc7    | <tm1b(KOMP)Wtsi>    | C57BL/6NTac                             | Heterozygote | F | 219 | 49 | 19 | 205 | 48  | 4  | 0.936 | 0.7147 | 33   |
| Arpc1b   | <tm1a(EUCOMM)Wtsi>  | C57BL/6NTac                             | Homozygote   | F | 185 | 73 | 17 | 237 | 102 | 6  | 1.281 | 0.1945 | 32   |
| Arpc3    | <tm1a(EUCOMM)Wtsi>  | C57BL/6NTac                             | Heterozygote | M | 197 | 55 | 9  | 144 | 49  | 3  | 0.731 | 0.1455 | 5    |
| Arrdc5   | <tm1b(EUCOMM)Wtsi>  | C57BL/6NTac                             | Homozygote   | M | 159 | 55 | 28 | 160 | 45  | 6  | 1.006 | 0.8036 | 78   |
| Arsg     | <tm1a(KOMP)Wtsi>    | C57BL/6NTac                             | Homozygote   | F | 238 | 86 | 6  | 218 | 34  | 6  | 0.916 | 0.3939 | 12   |
| Art4     | <tm1a(KOMP)Wtsi>    | C57BL/6NTac                             | Homozygote   | F | 277 | 62 | 11 | 266 | 40  | 6  | 0.960 | 0.311  | 22.5 |
| Asb6     | <tm1a(KOMP)Wtsi>    | C57BL/6NTac                             | Homozygote   | F | 138 | 37 | 12 | 164 | 7   | 3  | 1.188 | 0.2195 | 9    |
| Aspm     | <tm1a(KOMP)Wtsi>    | C57BL/6NTac                             | Homozygote   | M | 227 | 36 | 13 | 237 | 60  | 3  | 1.044 | 0.893  | 18   |
| Atad2    | <tm1a(EUCOMM)Wtsi>  | C57BL/6NTac                             | Homozygote   | F | 270 | 86 | 14 | 233 | 64  | 5  | 0.863 | 0.1756 | 20   |
| Atad3a   | <tm1a(KOMP)Wtsi>    | C57BL/6NTac                             | Heterozygote | M | 193 | 38 | 13 | 48  | 55  | 5  | 0.249 | 0.0022 | 1    |

|                 |                                 |                                         |                   |          |            |           |           |            |           |          |              |               |           |
|-----------------|---------------------------------|-----------------------------------------|-------------------|----------|------------|-----------|-----------|------------|-----------|----------|--------------|---------------|-----------|
| Atg16l1         | <tm1a(EUCOMM)Wtsi>              | C57BL/6NTac                             | Heterozygote      | F        | 127        | 47        | 20        | 146        | 18        | 5        | 1.150        | 0.3946        | 37        |
| Atg16l2         | <tm1a(EUCOMM)Wtsi>              | C57BL/6NTac                             | Homozygote        | M        | 162        | 49        | 20        | 121        | 25        | 6        | 0.747        | 0.0479        | 27        |
| Atp11a          | <tm1a(KOMP)Wtsi>                | C57BL/6NTac                             | Heterozygote      | F        | 228        | 79        | 15        | 201        | 99        | 4        | 0.882        | 0.5822        | 24        |
| Atp5e           | <tm1b(EUCOMM)Wtsi>              | C57BL/6NTac                             | Heterozygote      | M        | 110        | 45        | 20        | 119        | 47        | 5        | 1.082        | 0.9727        | 49        |
| Atp5f1          | <tm1b(EUCOMM)Wtsi>              | C57BL/6NTac                             | Heterozygote      | F        | 133        | 49        | 16        | 147        | 28        | 5        | 1.105        | 0.4826        | 31        |
| Atp8b2          | <tm1a(KOMP)Wtsi>                | C57BL/6NTac                             | Homozygote        | F        | 233        | 58        | 17        | 227        | 49        | 4        | 0.974        | 0.9641        | 33        |
| Atxn10          | <tm1b(KOMP)Wtsi>                | C57BL/6NTac                             | Heterozygote      | M        | 121        | 33        | 25        | 96         | 24        | 5        | 0.793        | 0.0662        | 29        |
| Atxn3           | <tm1a(KOMP)Wtsi>                | C57BL/6NTac                             | Homozygote        | F        | 206        | 55        | 17        | 231        | 51        | 5        | 1.121        | 0.4328        | 32        |
| B9d2            | <tm1a(KOMP)Wtsi>                | C57BL/6NTac                             | Heterozygote      | F        | 139        | 41        | 18        | 168        | 78        | 6        | 1.209        | 0.3859        | 40.5      |
| <b>Bach2</b>    | <b>&lt;tm1a(EUCOMM)Wtsi&gt;</b> | <b>C57BL/6NTac</b>                      | <b>Homozygote</b> | <b>F</b> | <b>129</b> | <b>51</b> | <b>27</b> | <b>40</b>  | <b>5</b>  | <b>4</b> | <b>0.310</b> | <b>0.0122</b> | <b>11</b> |
| Bai1            | <tm2a(EUCOMM)Wtsi>              | C57BL/6NTac                             | Homozygote        | F        | 155        | 48        | 20        | 130        | 49        | 5        | 0.839        | 0.3074        | 34.5      |
| Bap1            | <tm1a(EUCOMM)HgmU>              | C57BL/6NTac                             | Heterozygote      | M        | 108        | 39        | 12        | 125        | 46        | 5        | 1.157        | 0.3425        | 30.5      |
| <b>BC017643</b> | <b>&lt;tm1a(KOMP)Wtsi&gt;</b>   | <b>C57BL/6NTac</b>                      | <b>Homozygote</b> | <b>F</b> | <b>240</b> | <b>49</b> | <b>6</b>  | <b>121</b> | <b>51</b> | <b>4</b> | <b>0.504</b> | <b>0.0247</b> | <b>1</b>  |
| BC023829        | <tm1a(KOMP)Wtsi>                | C57BL/6NTac                             | Homozygote        | F        | 270        | 52        | 19        | 222        | 67        | 5        | 0.822        | 0.0744        | 22        |
| BC089597        | <tm1a(KOMP)Wtsi>                | C57BL/6NTac                             | Homozygote        | F        | 218        | 37        | 9         | 218        | 49        | 5        | 1.000        | 0.8937        | 21        |
| Bhlhe40         | <tm1b(KOMP)Wtsi>                | C57BL/6NTac                             | Homozygote        | M        | 100        | 26        | 12        | 112        | 10        | 7        | 1.120        | 0.1171        | 23        |
| Bivm            | <tm1b(KOMP)Wtsi>                | C57BL/6NTac                             | Homozygote        | M        | 142        | 69        | 17        | 164        | 36        | 5        | 1.155        | 0.4334        | 32        |
| Bnip2           | <tm1b(EUCOMM)Wtsi>              | C57BL/6NTac                             | Homozygote        | F        | 133        | 40        | 32        | 140        | 15        | 3        | 1.053        | 0.8828        | 45        |
| Bpgm            | <tm1a(KOMP)Wtsi>                | C57BL/6NTac                             | Homozygote        | M        | 119        | 29        | 17        | 121        | 35        | 5        | 1.017        | 0.9375        | 41        |
| Bpifb1          | <tm1e(KOMP)Wtsi>                | C57BL/6NTac                             | Homozygote        | M        | 240        | 51        | 15        | 227        | 55        | 3        | 0.946        | 0.6354        | 18        |
| Bpifb5          | <tm2a(KOMP)Wtsi>                | C57BL/6NTac                             | Homozygote        | F        | 299        | 67        | 13        | 270        | 39        | 5        | 0.903        | 0.2543        | 20.5      |
| Brcc3           | <em1Wtsi>                       | C57BL/6NTac                             | Homozygote        | M        | 88         | 21        | 21        | 128        | 28        | 4        | 1.455        | 0.0412        | 14        |
| Brd2            | <em1Wtsi>                       | C57BL/6NTac                             | Heterozygote      | M        | 121        | 38        | 16        | 127        | 56        | 5        | 1.050        | 0.9341        | 38.5      |
| Brd8            | <tm1a(EUCOMM)Wtsi>              | C57BL/6Brd-Tyr, C57BL/6Dnk, C57BL/6NTac | Heterozygote      | F        | 265        | 51        | 6         | 283        | 73        | 10       | 1.068        | 0.5505        | 24        |
| Cabp1           | <tm1a(EUCOMM)Wtsi>              | C57BL/6NTac                             | Homozygote        | F        | 238        | 86        | 6         | 213        | 78        | 5        | 0.895        | 0.7144        | 12.5      |
| Cadm1           | <tm1.2Brd>                      | C57BL/6Brd-Tyr, C57BL/6J, 129S5/SvEvBrd | Homozygote        | F        | 156        | 48        | 9         | 164        | 50        | 3        | 1.051        | 0.8636        | 12        |
| Calcoco2        | <tm1a(EUCOMM)Wtsi>              | C57BL/6NTac                             | Homozygote        | F        | 247        | 75        | 10        | 258        | 39        | 5        | 1.045        | 0.902         | 23.5      |
| Camkmt          | <tm1b(EUCOMM)Wtsi>              | C57BL/6NTac                             | Homozygote        | M        | 94         | 28        | 24        | 95         | 26        | 5        | 1.011        | 0.795         | 55        |
| Camsap3         | <tm1a(EUCOMM)Wtsi>              | C57BL/6NTac                             | Homozygote        | F        | 151        | 42        | 17        | 187        | 87        | 3        | 1.238        | 0.3969        | 17        |
| Capn11          | <tm1b(EUCOMM)Wtsi>              | C57BL/6NTac                             | Homozygote        | M        | 128        | 36        | 20        | 168        | 30        | 3        | 1.313        | 0.1205        | 12.5      |
| Capza2          | <tm1(KOMP)Wtsi>                 | C57BL/6NTac                             | Heterozygote      | M        | 187        | 49        | 21        | 134        | 34        | 4        | 0.717        | 0.0413        | 14        |
| Card9           | <tm1a(EUCOMM)HgmU>              | C57BL/6NTac                             | Homozygote        | M        | 147        | 67        | 16        | 114        | 23        | 3        | 0.776        | 0.6953        | 20        |
| Casc4           | <tm2b(EUCOMM)Wtsi>              | C57BL/6NTac                             | Homozygote        | M        | 170        | 54        | 22        | 166        | 44        | 6        | 0.976        | 0.9108        | 63.5      |
| Casp12          | <tm1a(KOMP)Wtsi>                | C57BL/6NTac                             | Homozygote        | M        | 280        | 56        | 6         | 272        | 61        | 6        | 0.971        | 0.6991        | 15        |
| Catip           | <tm1b(KOMP)Wtsi>                | C57BL/6NTac                             | Homozygote        | M        | 119        | 29        | 17        | 79         | 42        | 5        | 0.664        | 0.0599        | 18        |
| Cbr2            | <tm1a(EUCOMM)HgmU>              | C57BL/6NTac                             | Homozygote        | F        | 352        | 93        | 20        | 395        | 58        | 7        | 1.122        | 0.2806        | 50        |
| Cbx6            | <tm1a(EUCOMM)Wtsi>              | C57BL/6NTac                             | Heterozygote      | F        | 220        | 40        | 13        | 231        | 39        | 4        | 1.050        | 0.6502        | 21.5      |
| Ccdc122         | <tm1a(KOMP)Wtsi>                | C57BL/6NTac                             | Homozygote        | M        | 201        | 52        | 14        | 165        | 24        | 4        | 0.821        | 0.31          | 18        |
| Ccdc127         | <tm1b(EUCOMM)Wtsi>              | C57BL/6NTac                             | Homozygote        | F        | 171        | 50        | 23        | 158        | 45        | 3        | 0.924        | 0.5741        | 27        |
| Ccdc134         | <tm1a(KOMP)Wtsi>                | C57BL/6NTac                             | Heterozygote      | F        | 172        | 59        | 10        | 147        | 50        | 8        | 0.855        | 0.2294        | 26        |
| Ccdc159         | <tm1a(KOMP)Wtsi>                | C57BL/6NTac                             | Homozygote        | M        | 147        | 36        | 17        | 160        | 49        | 4        | 1.088        | 0.4447        | 25        |
| Ccdc160         | <tm1a(EUCOMM)Wtsi>              | C57BL/6NTac                             | Homozygote        | F        | 186        | 45        | 10        | 220        | 125       | 3        | 1.183        | 0.5536        | 11        |
| Ccdc18          | <tm1a(EUCOMM)Wtsi>              | C57BL/6NTac                             | Homozygote        | F        | 153        | 48        | 16        | 164        | 67        | 8        | 1.072        | 0.2972        | 46.5      |
| Ccdc24          | <tm1a(KOMP)Wtsi>                | C57BL/6NTac                             | Homozygote        | F        | 220        | 40        | 13        | 218        | 19        | 6        | 0.991        | 0.7919        | 35.5      |
| Ccdc6           | <em1Wtsi>                       | C57BL/6NTac                             | Heterozygote      | M        | 170        | 29        | 23        | 175        | 22        | 5        | 1.029        | 0.8807        | 54.5      |
| Ccdc69          | <tm1b(KOMP)Wtsi>                | C57BL/6NTac                             | Homozygote        | F        | 123        | 35        | 20        | 93         | 36        | 5        | 0.756        | 0.1534        | 28.5      |
| Ccl22           | <tm1a(EUCOMM)Wtsi>              | C57BL/6NTac                             | Heterozygote      | F        | 222        | 55        | 13        | 211        | 50        | 7        | 0.950        | 0.8417        | 42.5      |
| Cd300lg         | <tm1a(KOMP)Wtsi>                | C57BL/6NTac                             | Homozygote        | M        | 147        | 35        | 6         | 125        | 23        | 3        | 0.850        | 0.5476        | 6         |
| Cdca8           | <tm1a(KOMP)Wtsi>                | C57BL/6NTac                             | Heterozygote      | F        | 281        | 51        | 12        | 271        | 64        | 8        | 0.964        | 0.9691        | 47        |
| Cdh19           | <tm1a(EUCOMM)Wtsi>              | C57BL/6NTac                             | Homozygote        | F        | 222        | 65        | 11        | 222        | 62        | 6        | 1.000        | 0.9199        | 31.5      |
| Cdh23           | <v>                             | Mixed                                   | Homozygote        | M        | 219        | 57        | 3         | 253        | 61        | 4        | 1.155        | 0.7213        | 4.5       |
| Cdk4            | <R24C/R24/C>                    | C57BL/6                                 | Homozygote        | M        | 120        | 44        | 15        | 157        | 48        | 9        | 1.308        | 0.0836        | 38        |
| Cdk5rap2        | <tm1a(EUCOMM)Wtsi>              | C57BL/6NTac                             | Homozygote        | M        | 113        | 42        | 17        | 116        | 27        | 4        | 1.027        | 1             | 29.5      |
| Cdkal1          | <tm2a(EUCOMM)Wtsi>              | C57BL/6NTac                             | Homozygote        | M        | 205        | 57        | 8         | 269        | 99        | 8        | 1.312        | 0.1883        | 19        |
| Cdkn2aipnl      | <tm1b(KOMP)Wtsi>                | C57BL/6NTac                             | Homozygote        | F        | 201        | 52        | 24        | 181        | 82        | 5        | 0.900        | 0.4876        | 47.5      |
| Cdyl            | <em1Wtsi>                       | C57BL/6NTac                             | Heterozygote      | M        | 79         | 29        | 21        | 71         | 38        | 6        | 0.893        | 0.5022        | 51        |

|                      |                        |                                         |              |   |     |     |    |     |     |    |       |        |      |
|----------------------|------------------------|-----------------------------------------|--------------|---|-----|-----|----|-----|-----|----|-------|--------|------|
| <i>Celf4</i>         | <tm1a(EUCOMM)Wtsi>     | C57BL/6NTac                             | Heterozygote | F | 204 | 53  | 14 | 213 | 44  | 3  | 1.044 | 0.9498 | 21   |
| <i>Cenpl</i>         | <tm1b(EUCOMM)Wtsi>     | C57BL/6NTac                             | Heterozygote | M | 120 | 56  | 22 | 136 | 32  | 5  | 1.133 | 0.2354 | 35.5 |
| <i>Cep250</i>        | <tm1a(EUCOMM)Wtsi>     | C57BL/6NTac                             | Homozygote   | M | 166 | 43  | 22 | 166 | 26  | 6  | 1.000 | 0.8164 | 61.5 |
| <i>Cfap61</i>        | <tm2a(EUCOMM)Wtsi>     | C57BL/6NTac                             | Homozygote   | M | 234 | 106 | 17 | 305 | 78  | 4  | 1.303 | 0.2626 | 21   |
| <i>Cgrrf1</i>        | <tm1b(KOMP)Wtsi>       | C57BL/6NTac                             | Homozygote   | F | 185 | 35  | 25 | 212 | 20  | 4  | 1.146 | 0.1456 | 26.5 |
| <i>Chd9</i>          | <tm1a(EUCOMM)Wtsi>     | C57BL/6NTac                             | Homozygote   | M | 162 | 35  | 13 | 162 | 23  | 4  | 1.000 | 0.8651 | 24   |
| <i>Chil4</i>         | <tm1b(EUCOMM)Hmgu>     | C57BL/6NTac                             | Homozygote   | M | 147 | 38  | 23 | 147 | 33  | 5  | 1.000 | 0.9761 | 56.5 |
| <i>Chka</i>          | <tm2a(KOMP)Wtsi>       | C57BL/6NTac                             | Heterozygote | M | 70  | 23  | 22 | 69  | 17  | 5  | 0.986 | 0.9502 | 53.5 |
| <i>Chmp6</i>         | <tm1b(KOMP)Wtsi>       | C57BL/6NTac                             | Heterozygote | M | 121 | 34  | 15 | 122 | 15  | 3  | 1.008 | 0.7667 | 19.5 |
| <i>Chst11</i>        | <tm1a(KOMP)Wtsi>       | C57BL/6NTac                             | Heterozygote | M | 104 | 31  | 13 | 109 | 12  | 5  | 1.048 | 0.3748 | 23   |
| <i>Chtop</i>         | <tm1a(KOMP)Wtsi>       | C57BL/6NTac                             | Heterozygote | M | 108 | 39  | 12 | 118 | 37  | 5  | 1.093 | 0.5621 | 24   |
| <i>Cir1</i>          | <tm1a(KOMP)Wtsi>       | C57BL/6NTac                             | Heterozygote | M | 127 | 45  | 17 | 138 | 50  | 6  | 1.087 | 0.7253 | 45.5 |
| <i>Clk1</i>          | <tm1a(EUCOMM)Wtsi/lcs> | C57BL/6NTac                             | Homozygote   | F | 240 | 49  | 6  | 183 | 61  | 6  | 0.763 | 0.1481 | 8.5  |
| <i>Clpp</i>          | <tm1a(EUCOMM)Wtsi>     | C57BL/6NTac                             | Homozygote   | F | 146 | 26  | 13 | 170 | 31  | 4  | 1.164 | 0.157  | 13   |
| <i>Cmb1</i>          | <tm1b(KOMP)Wtsi>       | C57BL/6NTac                             | Homozygote   | M | 150 | 39  | 18 | 152 | 33  | 7  | 1.013 | 0.8797 | 60   |
| <i>Cmip</i>          | <tm1a(EUCOMM)Wtsi>     | C57BL/6NTac                             | Heterozygote | M | 234 | 64  | 14 | 254 | 109 | 5  | 1.085 | 0.5473 | 28   |
| <i>Cmtm4</i>         | <tm1a(EUCOMM)Wtsi>     | C57BL/6NTac                             | Homozygote   | F | 193 | 47  | 18 | 236 | 33  | 4  | 1.223 | 0.0805 | 15   |
| <i>Cmtm5</i>         | <tm1a(KOMP)Wtsi>       | C57BL/6NTac                             | Homozygote   | F | 164 | 47  | 18 | 208 | 37  | 5  | 1.268 | 0.0572 | 19   |
| <i>Cmtm6</i>         | <tm1a(EUCOMM)Wtsi>     | C57BL/6NTac                             | Homozygote   | F | 298 | 78  | 12 | 275 | 46  | 6  | 0.923 | 0.2232 | 22.5 |
| <i>Cnbd1</i>         | <tm1b(EUCOMM)Wtsi>     | C57BL/6NTac                             | Homozygote   | F | 247 | 47  | 15 | 272 | 27  | 3  | 1.101 | 0.2352 | 12   |
| <i>Cnih3</i>         | <tm1a(KOMP)Wtsi>       | C57BL/6NTac                             | Homozygote   | M | 203 | 60  | 20 | 194 | 40  | 6  | 0.956 | 0.4651 | 47.5 |
| <i>Cnot4</i>         | <tm1b(EUCOMM)Wtsi>     | C57BL/6NTac                             | Heterozygote | M | 170 | 50  | 28 | 153 | 50  | 5  | 0.900 | 0.4362 | 54   |
| <i>Cnot6</i>         | <tm1a(KOMP)Wtsi>       | C57BL/6NTac                             | Heterozygote | F | 270 | 86  | 14 | 266 | 74  | 5  | 0.985 | 1      | 34.5 |
| <i>Cog6</i>          | <tm1a(EUCOMM)Wtsi>     | C57BL/6NTac                             | Homozygote   | F | 144 | 46  | 18 | 102 | 14  | 4  | 0.708 | 0.0805 | 15   |
| <i>Col24a1</i>       | <tm1b(EUCOMM)Wtsi>     | C57BL/6NTac                             | Homozygote   | F | 138 | 37  | 12 | 138 | 13  | 5  | 1.000 | 0.3163 | 20   |
| <i>Col4a3bp</i>      | <tm1a(KOMP)Wtsi>       | C57BL/6NTac                             | Heterozygote | M | 104 | 31  | 13 | 116 | 40  | 5  | 1.115 | 0.5873 | 26.5 |
| <i>Commd10</i>       | <tm1a(EUCOMM)Wtsi>     | C57BL/6NTac                             | Heterozygote | F | 200 | 47  | 16 | 209 | 24  | 4  | 1.045 | 0.6699 | 27   |
| <i>Copg</i>          | <tm1a(EUCOMM)Wtsi>     | C57BL/6NTac                             | Heterozygote | F | 222 | 55  | 13 | 216 | 84  | 7  | 0.973 | 0.5517 | 37.5 |
| <i>Coq4</i>          | <tm1a(EUCOMM)Wtsi>     | C57BL/6NTac                             | Heterozygote | F | 319 | 77  | 18 | 282 | 81  | 10 | 0.884 | 0.1951 | 62.5 |
| <i>Coro1c</i>        | <tm1a(KOMP)Wtsi>       | C57BL/6NTac                             | Heterozygote | M | 209 | 53  | 16 | 214 | 67  | 6  | 1.024 | 0.8536 | 45   |
| <i>Coro6</i>         | <tm1e(EUCOMM)Wtsi>     | C57BL/6NTac                             | Homozygote   | F | 144 | 40  | 20 | 129 | 31  | 8  | 0.896 | 0.4012 | 63   |
| <i>Cpsf3</i>         | <tm1b(EUCOMM)Wtsi>     | C57BL/6NTac                             | Heterozygote | M | 234 | 64  | 14 | 243 | 43  | 7  | 1.038 | 0.6014 | 41.5 |
| <i>Cpsf3l</i>        | <tm2b(EUCOMM)Wtsi>     | C57BL/6NTac                             | Heterozygote | M | 132 | 38  | 32 | 147 | 17  | 7  | 1.114 | 0.456  | 91   |
| <i>Cpt2</i>          | <tm1b(KOMP)Wtsi>       | C57BL/6NTac                             | Heterozygote | M | 181 | 35  | 15 | 176 | 31  | 5  | 0.972 | 0.693  | 32.5 |
| <i>Crb2</i>          | <tm1a(KOMP)Wtsi>       | C57BL/6NTac                             | Heterozygote | F | 133 | 37  | 10 | 120 | 47  | 6  | 0.902 | 0.7858 | 27   |
| <i>Creb3l1</i>       | <tm1e(EUCOMM)Wtsi>     | C57BL/6NTac                             | Heterozygote | F | 291 | 60  | 10 | 239 | 53  | 6  | 0.821 | 0.115  | 11   |
| <i>Crim1</i>         | <em1Wtsi>              | C57BL/6NTac                             | Heterozygote | M | 70  | 23  | 22 | 96  | 22  | 6  | 1.371 | 0.0333 | 27.5 |
| <i>Crip2</i>         | <tm1a(EUCOMM)Wtsi>     | C57BL/6NTac                             | Homozygote   | M | 170 | 29  | 23 | 125 | 36  | 4  | 0.735 | 0.0315 | 14   |
| <i>Crif3</i>         | <tm1a(KOMP)Wtsi>       | C57BL/6Brd-Tyr, C57BL/6Dnk, C57BL/6NTac | Homozygote   | F | 204 | 47  | 7  | 197 | 15  | 3  | 0.966 | 0.6667 | 8    |
| <i>Cris1</i>         | <tm1a(EUCOMM)Wtsi>     | C57BL/6NTac                             | Heterozygote | M | 88  | 19  | 23 | 87  | 34  | 6  | 0.989 | 0.9141 | 66.5 |
| <i>Csmd1</i>         | <em2Wtsi>              | C57BL/6NTac                             | Homozygote   | M | 111 | 33  | 19 | 111 | 16  | 6  | 1.000 | 0.9239 | 55   |
| <i>Csnk1g3</i>       | <tm1a(EUCOMM)Wtsi>     | C57BL/6NTac                             | Homozygote   | M | 76  | 28  | 21 | 132 | 37  | 5  | 1.737 | 0.0076 | 11   |
| <i>Ctr9</i>          | <tm1b(EUCOMM)Wtsi>     | C57BL/6NTac                             | Heterozygote | M | 144 | 37  | 11 | 161 | 41  | 6  | 1.118 | 0.2889 | 22   |
| <i>Cttnbp2</i>       | <tm1b(KOMP)Wtsi>       | C57BL/6NTac                             | Homozygote   | F | 133 | 47  | 20 | 165 | 77  | 6  | 1.241 | 0.4467 | 47   |
| <i>Cutal</i>         | <tm1a(EUCOMM)Wtsi>     | C57BL/6NTac                             | Homozygote   | M | 180 | 62  | 26 | 169 | 40  | 7  | 0.939 | 0.708  | 82   |
| <i>Cxcr1</i>         | <tm1a(EUCOMM)Wtsi>     | C57BL/6NTac                             | Homozygote   | M | 143 | 43  | 21 | 158 | 58  | 4  | 1.105 | 0.6037 | 34.5 |
| <i>Cxcr2</i>         | <tm1a(EUCOMM)Wtsi>     | C57BL/6NTac                             | Homozygote   | F | 247 | 47  | 15 | 238 | 12  | 3  | 0.964 | 0.9055 | 21   |
| <b>Cyba</b>          | <tm1a(EUCOMM)Wtsi>     | C57BL/6NTac                             | Homozygote   | M | 118 | 38  | 18 | 32  | 13  | 5  | 0.271 | 0.0009 | 0    |
| <b>Cybb</b>          | <tm1Din>               | C57BL/6J                                | Homozygote   | F | 162 | 65  | 12 | 76  | 42  | 7  | 0.469 | 0.0077 | 10   |
| <i>Cyfp1</i>         | <tm2a(EUCOMM)Wtsi>     | C57BL/6NTac                             | Heterozygote | F | 249 | 82  | 10 | 261 | 38  | 7  | 1.048 | 0.6959 | 30.5 |
| <i>Cyfp2</i>         | <tm1a(EUCOMM)Wtsi>     | C57BL/6NTac                             | Heterozygote | M | 113 | 42  | 17 | 115 | 20  | 4  | 1.018 | 1      | 33.5 |
| <i>Cyp11a1</i>       | <tm1b(EUCOMM)Wtsi>     | C57BL/6NTac                             | Heterozygote | M | 109 | 24  | 20 | 85  | 15  | 6  | 0.780 | 0.0357 | 25   |
| <i>Cyp20a1</i>       | <tm1a(EUCOMM)Wtsi>     | C57BL/6NTac                             | Homozygote   | F | 298 | 78  | 12 | 308 | 52  | 6  | 1.034 | 0.8513 | 33.5 |
| <i>Cyp2b13</i>       | <tm1b(KOMP)Wtsi>       | C57BL/6NTac                             | Homozygote   | F | 179 | 50  | 23 | 214 | 80  | 6  | 1.196 | 0.4672 | 55   |
| <i>Cyp2r1</i>        | <tm1b(EUCOMM)Wtsi>     | C57BL/6NTac                             | Homozygote   | F | 205 | 29  | 12 | 202 | 41  | 7  | 0.985 | 0.6398 | 36   |
| <i>Cyp3a11</i>       | <tm1a(KOMP)Wtsi>       | C57BL/6NTac                             | Homozygote   | F | 191 | 50  | 18 | 203 | 32  | 3  | 1.063 | 0.0814 | 24   |
| <i>D630023F18Rik</i> | <tm1b(KOMP)Wtsi>       | C57BL/6NTac                             | Homozygote   | M | 159 | 46  | 17 | 200 | 41  | 6  | 1.258 | 0.0498 | 22.5 |

|               |                               |                    |                   |          |            |           |           |            |           |          |              |              |          |
|---------------|-------------------------------|--------------------|-------------------|----------|------------|-----------|-----------|------------|-----------|----------|--------------|--------------|----------|
| D7Erd443e     | <tm2a(KOMP)Wtsi>              | C57BL/6NTac        | Homozygote        | M        | 155        | 47        | 22        | 160        | 44        | 4        | 1.032        | 0.9716       | 44       |
| D930028M14Rik | <tm1a(EUCOMM)Wtsi>            | C57BL/6NTac        | Heterozygote      | M        | 97         | 34        | 24        | 76         | 24        | 5        | 0.784        | 0.1408       | 34       |
| Daam2         | <tm1a(KOMP)Wtsi>              | C57BL/6NTac        | Homozygote        | F        | 229        | 57        | 16        | 223        | 79        | 5        | 0.974        | 0.5904       | 33       |
| Dact3         | <tm1b(KOMP)Wtsi>              | C57BL/6NTac        | Homozygote        | M        | 141        | 45        | 23        | 167        | 25        | 5        | 1.184        | 0.2668       | 38.5     |
| Daf2          | <tm1a(KOMP)Wtsi>              | C57BL/6NTac        | Homozygote        | F        | 270        | 52        | 19        | 286        | 43        | 5        | 1.059        | 0.668        | 41       |
| Dap           | <tm1a(KOMP)Mbp>               | C57BL/6NTac        | Homozygote        | M        | 239        | 57        | 13        | 234        | 26        | 4        | 0.979        | 0.8207       | 23.5     |
| Dapk2         | <tm1b(EUCOMM)Wtsi>            | C57BL/6NTac        | Homozygote        | F        | 130        | 37        | 25        | 128        | 42        | 6        | 0.985        | 0.98         | 74       |
| Dbn1          | <tm1b(KOMP)Wtsi>              | C57BL/6NTac        | Heterozygote      | F        | 186        | 37        | 13        | 194        | 43        | 5        | 1.043        | 0.9214       | 31       |
| Dcaf11        | <tm1a(KOMP)Wtsi>              | C57BL/6NTac        | Homozygote        | F        | 168        | 45        | 18        | 208        | 68        | 8        | 1.238        | 0.1133       | 43       |
| Dcbl2         | <tm1a(KOMP)Wtsi>              | C57BL/6NTac        | Homozygote        | F        | 178        | 54        | 12        | 229        | 86        | 4        | 1.287        | 0.2022       | 13       |
| Dcdc2b        | <tm1b(KOMP)Wtsi>              | C57BL/6NTac        | Homozygote        | F        | 225        | 72        | 20        | 220        | 61        | 4        | 0.978        | 0.6701       | 34       |
| Dcdc2c        | <tm1a(KOMP)Wtsi>              | C57BL/6NTac        | Homozygote        | F        | 198        | 41        | 12        | 239        | 29        | 4        | 1.207        | 0.078        | 9        |
| Dclk1         | <tm1a(EUCOMM)Wtsi>            | C57BL/6NTac        | Heterozygote      | F        | 206        | 55        | 17        | 234        | 32        | 6        | 1.136        | 0.2337       | 33.5     |
| Dcn           | <em2Wtsi>                     | C57BL/6NTac        | Homozygote        | M        | 111        | 33        | 19        | 142        | 51        | 5        | 1.279        | 0.2406       | 30.5     |
| Dctn1         | <tm1a(EUCOMM)Wtsi>            | C57BL/6NTac        | Heterozygote      | F        | 229        | 57        | 16        | 206        | 40        | 7        | 0.900        | 0.4618       | 44.5     |
| Dcun1d3       | <em2Wtsi>                     | C57BL/6NTac        | Heterozygote      | M        | 132        | 38        | 32        | 136        | 26        | 6        | 1.030        | 0.9922       | 95.5     |
| Dcx           | <tm1a(EUCOMM)Wtsi>            | C57BL/6NTac        | Homozygote        | M        | 111        | 35        | 25        | 108        | 63        | 4        | 0.973        | 0.9748       | 50       |
| Ddah1         | <tm2a(EUCOMM)Wtsi>            | C57BL/6NTac        | Homozygote        | M        | 143        | 43        | 21        | 152        | 35        | 5        | 1.063        | 0.6962       | 46       |
| Ddhd1         | <tm1a(KOMP)Wtsi>              | C57BL/6NTac        | Homozygote        | F        | 133        | 37        | 10        | 131        | 41        | 5        | 0.985        | 0.9507       | 25       |
| Ddx42         | <tm1b(EUCOMM)Wtsi>            | C57BL/6NTac        | Heterozygote      | F        | 225        | 37        | 19        | 174        | 50        | 5        | 0.773        | 0.0463       | 19       |
| Ddx51         | <tm1a(KOMP)Wtsi>              | C57BL/6NTac        | Heterozygote      | M        | 118        | 38        | 18        | 119        | 31        | 5        | 1.008        | 0.9702       | 44       |
| Ddx55         | <tm1a(EUCOMM)Wtsi>            | C57BL/6NTac        | Heterozygote      | M        | 142        | 39        | 13        | 120        | 42        | 5        | 0.845        | 0.2777       | 21       |
| Def6          | <tm1a(EUCOMM)Wtsi>            | C57BL/6NTac        | Homozygote        | F        | 210        | 55        | 11        | 202        | 55        | 4        | 0.962        | 0.8447       | 20       |
| Defb14        | <tm1b(KOMP)Wtsi>              | C57BL/6NTac        | Homozygote        | F        | 321        | 37        | 12        | 349        | 80        | 4        | 1.087        | 0.8075       | 21.5     |
| Defb22        | <tm1a(KOMP)Wtsi>              | C57BL/6NTac        | Homozygote        | F        | 219        | 49        | 19        | 171        | 33        | 4        | 0.781        | 0.0739       | 15.5     |
| Dennd1b       | <tm1a(EUCOMM)Hmgu>            | C57BL/6NTac        | Homozygote        | F        | 155        | 48        | 20        | 187        | 57        | 4        | 1.206        | 0.2611       | 25       |
| Dennd1c       | <tm1a(EUCOMM)Wtsi>            | C57BL/6NTac        | Homozygote        | F        | 144        | 46        | 12        | 147        | 45        | 6        | 1.021        | 0.9252       | 34.5     |
| Dennd4c       | <tm1b(EUCOMM)Wtsi>            | C57BL/6NTac        | Heterozygote      | M        | 103        | 37        | 20        | 92         | 19        | 5        | 0.893        | 0.7858       | 45.5     |
| Denr          | <tm1b(KOMP)Wtsi>              | C57BL/6NTac        | Heterozygote      | M        | 105        | 27        | 23        | 120        | 21        | 4        | 1.143        | 0.1245       | 23       |
| Dffb          | <em1Wtsi>                     | C57BL/6NTac        | Homozygote        | M        | 88         | 21        | 21        | 90         | 19        | 4        | 1.023        | 0.6566       | 35.5     |
| Dhodh         | <tm1b(EUCOMM)Wtsi>            | C57BL/6NTac        | Heterozygote      | F        | 150        | 41        | 12        | 135        | 22        | 5        | 0.900        | 0.7122       | 26       |
| Dhps          | <tm2a(EUCOMM)Wtsi>            | C57BL/6NTac        | Heterozygote      | M        | 149        | 46        | 20        | 148        | 30        | 5        | 0.993        | 0.9458       | 48.5     |
| Dhrs2         | <tm1a(KOMP)Wtsi>              | C57BL/6NTac        | Homozygote        | F        | 231        | 63        | 9         | 309        | 12        | 4        | 1.338        | 0.0205       | 2.5      |
| Dhx33         | <tm1b(KOMP)Wtsi>              | C57BL/6NTac        | Heterozygote      | M        | 188        | 49        | 23        | 183        | 40        | 6        | 0.973        | 0.8505       | 65       |
| Dhx35         | <tm1b(EUCOMM)Wtsi>            | C57BL/6NTac        | Heterozygote      | M        | 104        | 39        | 21        | 125        | 20        | 3        | 1.202        | 0.2216       | 17       |
| Dip2a         | <tm2b(KOMP)Wtsi>              | C57BL/6NTac        | Homozygote        | F        | 278        | 77        | 17        | 331        | 36        | 4        | 1.191        | 0.1784       | 18.5     |
| Dlg2          | <tm1a(EUCOMM)Wtsi>            | C57BL/6NTac        | Homozygote        | M        | 186        | 69        | 15        | 249        | 45        | 3        | 1.339        | 0.1384       | 9.5      |
| Dlg3          | <tm1a(EUCOMM)Wtsi>            | C57BL/6NTac        | Homozygote        | M        | 141        | 36        | 23        | 173        | 40        | 4        | 1.227        | 0.1714       | 25.5     |
| Dlg4          | <tm1e(EUCOMM)Wtsi>            | C57BL/6NTac        | Homozygote        | M        | 113        | 42        | 17        | 128        | 52        | 4        | 1.133        | 0.5015       | 26       |
| Dmgdh         | <tm1a(KOMP)Wtsi>              | C57BL/6NTac        | Homozygote        | F        | 133        | 49        | 16        | 146        | 45        | 5        | 1.098        | 0.5356       | 32       |
| Dmxl2         | <tm1a(EUCOMM)Wtsi>            | C57BL/6NTac        | Heterozygote      | F        | 190        | 56        | 12        | 150        | 30        | 6        | 0.789        | 0.0832       | 17       |
| Dnah17        | <tm1e(KOMP)Wtsi>              | C57BL/6NTac        | Homozygote        | M        | 109        | 24        | 20        | 96         | 23        | 5        | 0.881        | 0.5184       | 40       |
| Dnajc8        | <tm1b(KOMP)Wtsi>              | C57BL/6NTac        | Heterozygote      | M        | 121        | 34        | 15        | 98         | 19        | 5        | 0.810        | 0.1376       | 20       |
| Dnase112      | <tm1b(KOMP)Wtsi>              | C57BL/6NTac        | Homozygote        | F        | 278        | 77        | 17        | 268        | 55        | 6        | 0.964        | 0.806        | 47       |
| Dnmt3a        | <tm1a(KOMP)Wtsi>              | C57BL/6NTac        | Homozygote        | F        | 213        | 54        | 14        | 282        | 37        | 7        | 1.324        | 0.0111       | 14.5     |
| Dnpep         | <tm1e(EUCOMM)Wtsi>            | C57BL/6NTac        | Homozygote        | M        | 260        | 80        | 17        | 326        | 41        | 4        | 1.254        | 0.0664       | 13       |
| Donson        | <tm1a(EUCOMM)Wtsi>            | C57BL/6NTac        | Heterozygote      | M        | 165        | 55        | 7         | 135        | 23        | 5        | 0.818        | 0.4641       | 12.5     |
| Dopey2        | <tm1a(EUCOMM)Wtsi>            | C57BL/6NTac        | Homozygote        | M        | 113        | 53        | 4         | 110        | 23        | 4        | 0.973        | 1            | 8        |
| Dph2          | <tm2(EUCOMM)Wtsi>             | C57BL/6NTac        | Heterozygote      | M        | 175        | 76        | 15        | 237        | 40        | 3        | 1.354        | 0.1543       | 10       |
| <b>Dph6</b>   | <b>&lt;tm1a(KOMP)Wtsi&gt;</b> | <b>C57BL/6NTac</b> | <b>Homozygote</b> | <b>F</b> | <b>185</b> | <b>48</b> | <b>16</b> | <b>390</b> | <b>22</b> | <b>5</b> | <b>2.108</b> | <b>0.001</b> | <b>0</b> |
| Dpm1          | <tm1b(KOMP)Wtsi>              | C57BL/6NTac        | Heterozygote      | F        | 164        | 36        | 13        | 167        | 26        | 5        | 1.018        | 0.8053       | 29.5     |
| Dppa1         | <tm1a(KOMP)Wtsi>              | C57BL/6NTac        | Homozygote        | F        | 203        | 30        | 15        | 248        | 60        | 8        | 1.222        | 0.0865       | 33       |
| Dpy30         | <tm1a(KOMP)Wtsi>              | C57BL/6NTac        | Heterozygote      | M        | 120        | 21        | 15        | 162        | 24        | 4        | 1.350        | 0.0142       | 5        |
| Dsc2          | <tm1e(KOMP)Wtsi>              | C57BL/6NTac        | Homozygote        | F        | 153        | 48        | 16        | 134        | 30        | 5        | 0.876        | 0.4565       | 30.5     |
| Dscc1         | <tm1a(KOMP)Wtsi>              | C57BL/6NTac        | Heterozygote      | F        | 169        | 55        | 17        | 129        | 24        | 4        | 0.763        | 0.0807       | 14       |
| Dsg1b         | <tm1a(KOMP)Wtsi>              | C57BL/6NTac        | Homozygote        | F        | 142        | 39        | 11        | 119        | 30        | 8        | 0.838        | 0.3215       | 31.5     |
| Dusp5         | <tm1a(KOMP)Wtsi>              | C57BL/6NTac        | Homozygote        | F        | 201        | 52        | 24        | 242        | 26        | 5        | 1.204        | 0.1185       | 32.5     |

|                |                                      |                    |                   |          |            |           |           |            |           |          |              |               |            |
|----------------|--------------------------------------|--------------------|-------------------|----------|------------|-----------|-----------|------------|-----------|----------|--------------|---------------|------------|
| Dynlrb1        | <tm1a(EUCOMM)Wtsi>                   | C57BL/6NTac        | Heterozygote      | M        | 205        | 57        | 8         | 152        | 45        | 5        | 0.741        | 0.1604        | 8.5        |
| Dynlrb2        | <tm1a(KOMP)Wtsi>                     | C57BL/6NTac        | Heterozygote      | F        | 245        | 67        | 21        | 279        | 69        | 8        | 1.139        | 0.2513        | 60         |
| Eci3           | <tm1b(EUCOMM)Wtsi>                   | C57BL/6NTac        | Homozygote        | F        | 259        | 46        | 13        | 264        | 14        | 4        | 1.019        | 0.9545        | 26         |
| Edc4           | <tm1a(EUCOMM)Wtsi>                   | C57BL/6NTac        | Heterozygote      | F        | 200        | 47        | 16        | 198        | 50        | 4        | 0.990        | 0.9245        | 30.5       |
| Efna1          | <tm1a(EUCOMM)Wtsi>                   | C57BL/6NTac        | Homozygote        | F        | 178        | 54        | 12        | 191        | 39        | 7        | 1.073        | 0.6418        | 36         |
| Ehbp11         | <tm1a(EUCOMM)Wtsi>                   | C57BL/6NTac        | Heterozygote      | M        | 210        | 48        | 10        | 176        | 53        | 4        | 0.838        | 0.251         | 11.5       |
| Eif2b2         | <tm2a(KOMP)Wtsi>                     | C57BL/6NTac        | Heterozygote      | F        | 135        | 37        | 28        | 135        | 15        | 4        | 1.000        | 0.7967        | 51         |
| Eif3h          | <tm1a(EUCOMM)Hmgu>                   | C57BL/6NTac        | Heterozygote      | M        | 162        | 32        | 20        | 143        | 29        | 5        | 0.883        | 0.2086        | 31         |
| Elac2          | <tm1b(EUCOMM)Wtsi>                   | C57BL/6NTac        | Heterozygote      | M        | 162        | 49        | 20        | 133        | 40        | 4        | 0.821        | 0.2452        | 24.5       |
| Ell2           | <tm1a(EUCOMM)Wtsi>                   | C57BL/6NTac        | Homozygote        | M        | 175        | 76        | 15        | 211        | 55        | 8        | 1.206        | 0.1966        | 39.5       |
| Elmo1          | <tm1a(EUCOMM)Wtsi>                   | C57BL/6NTac        | Homozygote        | M        | 141        | 36        | 23        | 137        | 13        | 3        | 0.972        | 0.9359        | 33         |
| Enc1           | <tm1a(EUCOMM)Wtsi>                   | C57BL/6NTac        | Homozygote        | F        | 144        | 40        | 20        | 133        | 48        | 7        | 0.924        | 0.3466        | 52.5       |
| Endou          | <tm1>                                | C57BL/6NTac        | Homozygote        | F        | 147        | 30        | 12        | 149        | 52        | 8        | 1.014        | 0.787         | 44         |
| Enthd2         | <tm1b(KOMP)Wtsi>                     | C57BL/6NTac        | Homozygote        | M        | 85         | 36        | 14        | 93         | 16        | 5        | 1.094        | 0.7457        | 31         |
| <b>Entpd1</b>  | <b>&lt;tm1a(EUCOMM)Wtsi/Hmgu&gt;</b> | <b>C57BL/6Dnk</b>  | <b>Homozygote</b> | <b>F</b> | <b>215</b> | <b>51</b> | <b>17</b> | <b>78</b>  | <b>46</b> | <b>6</b> | <b>0.363</b> | <b>0.0004</b> | <b>0</b>   |
| Entpd6         | <tm1a(KOMP)Wtsi>                     | C57BL/6NTac        | Homozygote        | M        | 210        | 48        | 10        | 194        | 53        | 8        | 0.924        | 0.4758        | 31.5       |
| Erlin2         | <tm1a(EUCOMM)Wtsi>                   | C57BL/6NTac        | Homozygote        | M        | 181        | 35        | 15        | 187        | 24        | 4        | 1.033        | 0.9201        | 28.5       |
| Erp44          | <tm1a(KOMP)Wtsi>                     | C57BL/6NTac        | Heterozygote      | F        | 117        | 31        | 11        | 112        | 32        | 5        | 0.957        | 0.734         | 24         |
| Esco1          | <tm1(KOMP)Wtsi>                      | C57BL/6NTac        | Homozygote        | M        | 136        | 44        | 21        | 177        | 45        | 3        | 1.301        | 0.1625        | 15         |
| Espn           | <tm1a(EUCOMM)Wtsi>                   | C57BL/6NTac        | Homozygote        | F        | 214        | 59        | 12        | 198        | 40        | 8        | 0.925        | 0.9382        | 46.5       |
| Evi5           | <tm1a(KOMP)Wtsi>                     | C57BL/6NTac        | Homozygote        | F        | 216        | 60        | 15        | 182        | 95        | 3        | 0.843        | 0.4765        | 16         |
| Exoc3l2        | <tm1a(KOMP)Wtsi>                     | C57BL/6NTac        | Homozygote        | F        | 271        | 84        | 8         | 228        | 45        | 5        | 0.841        | 0.1709        | 10         |
| Exosc9         | <tm1b(EUCOMM)Wtsi>                   | C57BL/6NTac        | Heterozygote      | M        | 97         | 34        | 24        | 81         | 35        | 5        | 0.835        | 0.4883        | 47.5       |
| Expi           | <tm1a(KOMP)Wtsi>                     | C57BL/6NTac        | Homozygote        | F        | 164        | 47        | 18        | 164        | 22        | 6        | 1.000        | 0.6405        | 46.5       |
| Fads3          | <tm1b(EUCOMM)Wtsi>                   | C57BL/6NTac        | Homozygote        | M        | 152        | 57        | 24        | 163        | 41        | 7        | 1.072        | 0.9811        | 83         |
| Fam122c        | <tm1b(EUCOMM)Wtsi>                   | C57BL/6NTac        | Homozygote        | M        | 180        | 62        | 26        | 149        | 33        | 9        | 0.828        | 0.1086        | 74         |
| Fam160a1       | <tm1b(EUCOMM)Wtsi>                   | C57BL/6NTac        | Heterozygote      | M        | 70         | 23        | 22        | 92         | 18        | 5        | 1.314        | 0.086         | 27         |
| Fam163a        | <tm2b(KOMP)Wtsi>                     | C57BL/6NTac        | Homozygote        | M        | 186        | 56        | 32        | 192        | 51        | 4        | 1.032        | 1             | 63.5       |
| <b>Fam175b</b> | <b>&lt;tm1a(EUCOMM)Wtsi&gt;</b>      | <b>C57BL/6NTac</b> | <b>Homozygote</b> | <b>M</b> | <b>209</b> | <b>53</b> | <b>16</b> | <b>127</b> | <b>38</b> | <b>6</b> | <b>0.608</b> | <b>0.005</b>  | <b>9.5</b> |
| Fam21          | <tm2b(KOMP)Wtsi>                     | C57BL/6NTac        | Heterozygote      | M        | 69         | 17        | 10        | 86         | 18        | 7        | 1.246        | 0.1285        | 19         |
| Fam212b        | <tm1a(KOMP)Wtsi>                     | C57BL/6NTac        | Homozygote        | M        | 141        | 45        | 23        | 146        | 31        | 5        | 1.035        | 0.8808        | 54.5       |
| Fam46c         | <tm1b(KOMP)Wtsi>                     | C57BL/6NTac        | Heterozygote      | M        | 134        | 39        | 20        | 137        | 36        | 8        | 1.022        | 0.7218        | 72.5       |
| Fam47e         | <tm1a(EUCOMM)Wtsi>                   | C57BL/6NTac        | Homozygote        | M        | 93         | 40        | 17        | 138        | 22        | 4        | 1.484        | 0.0315        | 9.5        |
| Fam69a         | <tm1a(EUCOMM)Wtsi>                   | C57BL/6NTac        | Homozygote        | M        | 170        | 54        | 22        | 161        | 59        | 5        | 0.947        | 0.8514        | 51.5       |
| Fam92a         | <tm1b(KOMP)Wtsi>                     | C57BL/6NTac        | Homozygote        | F        | 127        | 47        | 20        | 138        | 55        | 5        | 1.087        | 0.153         | 28.5       |
| Fanci          | <tm1a(EUCOMM)Wtsi>                   | C57BL/6NTac        | Heterozygote      | M        | 203        | 38        | 16        | 191        | 63        | 4        | 0.941        | 0.8129        | 29         |
| Fbf1           | <tm1a(EUCOMM)Wtsi>                   | C57BL/6NTac        | Homozygote        | F        | 138        | 37        | 12        | 118        | 13        | 4        | 0.855        | 0.4662        | 17.5       |
| Fbxo33         | <tm1b(EUCOMM)Wtsi>                   | C57BL/6NTac        | Homozygote        | M        | 175        | 42        | 18        | 308        | 48        | 5        | 1.760        | 0.0009        | 0          |
| <b>Fbxo7</b>   | <b>&lt;tm1a(EUCOMM)Wtsi&gt;</b>      | <b>C57BL/6NTac</b> | <b>Homozygote</b> | <b>F</b> | <b>216</b> | <b>51</b> | <b>24</b> | <b>98</b>  | <b>50</b> | <b>3</b> | <b>0.388</b> | <b>0.0038</b> | <b>3.5</b> |
| Fbxw26         | <tm1b(KOMP)Wtsi>                     | C57BL/6NTac        | Homozygote        | M        | 204        | 43        | 11        | 156        | 56        | 5        | 0.765        | 0.1399        | 14         |
| Fdft1          | <tm1a(KOMP)Wtsi>                     | C57BL/6NTac        | Heterozygote      | F        | 156        | 46        | 18        | 166        | 45        | 6        | 1.064        | 0.4834        | 43         |
| Fggy           | <tm1a(KOMP)Wtsi>                     | C57BL/6NTac        | Homozygote        | F        | 247        | 98        | 12        | 192        | 43        | 12       | 0.777        | 0.2143        | 50         |
| Fkbp3          | <tm2a(EUCOMM)Wtsi>                   | C57BL/6NTac        | Homozygote        | M        | 187        | 49        | 21        | 197        | 21        | 3        | 1.053        | 0.9652        | 30.5       |
| Fnip2          | <tm1a(KOMP)Wtsi>                     | C57BL/6NTac        | Homozygote        | M        | 170        | 54        | 22        | 176        | 76        | 9        | 1.035        | 0.6166        | 87         |
| Frmf7          | <tm1a(KOMP)Wtsi>                     | C57BL/6NTac        | Homozygote        | F        | 218        | 37        | 9         | 205        | 77        | 5        | 0.940        | 0.7386        | 19.5       |
| Frrs1          | <tm1a(EUCOMM)Wtsi>                   | C57BL/6NTac        | Heterozygote      | M        | 193        | 45        | 8         | 267        | 42        | 5        | 1.383        | 0.019         | 3.5        |
| Fryl           | <tm1b(KOMP)Wtsi>                     | C57BL/6NTac        | Heterozygote      | F        | 100        | 29        | 22        | 113        | 20        | 5        | 1.130        | 0.4169        | 41.5       |
| Fut2           | <em1Wtsi>                            | C57BL/6NTac        | Homozygote        | M        | 138        | 29        | 20        | 106        | 51        | 6        | 0.768        | 0.128         | 34.5       |
| Fut8           | <em1Wtsi>                            | C57BL/6NTac        | Heterozygote      | F        | 176        | 37        | 21        | 149        | 35        | 3        | 0.847        | 0.2214        | 17         |
| Fxyd3          | <tm1a(KOMP)Wtsi>                     | C57BL/6NTac        | Homozygote        | M        | 143        | 43        | 21        | 144        | 43        | 6        | 1.007        | 0.9767        | 62         |
| Fzd6           | <tm2a(EUCOMM)Wtsi>                   | C57BL/6NTac        | Homozygote        | M        | 141        | 36        | 23        | 220        | 59        | 5        | 1.560        | 0.0082        | 13         |
| G3bp2          | <tm1a(EUCOMM)Wtsi>                   | C57BL/6NTac        | Heterozygote      | F        | 201        | 52        | 24        | 235        | 69        | 5        | 1.169        | 0.2846        | 41         |
| Galnt18        | <tm1b(KOMP)Wtsi>                     | C57BL/6NTac        | Homozygote        | F        | 136        | 43        | 24        | 140        | 57        | 4        | 1.029        | 0.5992        | 39.5       |
| Galntl5        | <tm1b(KOMP)Wtsi>                     | C57BL/6NTac        | Homozygote        | F        | 179        | 50        | 23        | 182        | 61        | 5        | 1.017        | 0.6313        | 49         |

|          |                                   |               |              |   |     |     |    |     |     |    |       |               |           |
|----------|-----------------------------------|---------------|--------------|---|-----|-----|----|-----|-----|----|-------|---------------|-----------|
| Gas2/2   | <tm1a(KOMP)Wtsi>                  | C57BL/6NTac   | Heterozygote | M | 79  | 29  | 21 | 102 | 21  | 5  | 1.292 | 0.2406        | 34        |
| Gbf1     | <tm1a(KOMP)Wtsi>                  | C57BL/6NTac   | Heterozygote | F | 210 | 55  | 11 | 205 | 82  | 4  | 0.976 | 0.896         | 20.5      |
| Gbp5     | <em1Wtsi>                         | C57BL/6NTac   | Homozygote   | M | 88  | 19  | 23 | 118 | 33  | 7  | 1.341 | 0.0131        | 29.5      |
| Gda      | <tm1a(EUCOMM)Wtsi>                | C57BL/6NTac   | Homozygote   | M | 83  | 29  | 26 | 104 | 42  | 5  | 1.253 | 0.1409        | 34        |
| Gdpc2    | <tm1a(KOMP)Wtsi>                  | C57BL/6NTac   | Homozygote   | M | 133 | 43  | 25 | 125 | 36  | 5  | 0.940 | 0.5043        | 50        |
| Gimap6   | <tm1a(KOMP)Wtsi>                  | C57BL/6NTac   | Homozygote   | F | 213 | 55  | 20 | 152 | 43  | 6  | 0.714 | 0.0224        | 22        |
| Glcc     | <tm1a(EUCOMM)Wtsi>                | C57BL/6NTac   | Heterozygote | F | 201 | 52  | 24 | 223 | 51  | 3  | 1.109 | 0.4864        | 26.5      |
| Glg1     | <tm1a(KOMP)Wtsi>                  | C57BL/6NTac   | Heterozygote | F | 219 | 59  | 10 | 242 | 57  | 5  | 1.105 | <b>0.6676</b> | <b>21</b> |
| Glo1     | <tm1a(KOMP)Wtsi>                  | C57BL/6NTac   | Homozygote   | M | 186 | 56  | 32 | 203 | 26  | 4  | 1.091 | 0.3647        | 45.5      |
| Gltd2    | <tm1a(KOMP)Wtsi>                  | C57BL/6NTac   | Homozygote   | F | 166 | 45  | 16 | 202 | 50  | 4  | 1.217 | 0.2019        | 18        |
| Glyatl3  | <em1Wtsi>                         | C57BL/6NTac   | Homozygote   | M | 100 | 26  | 12 | 121 | 24  | 5  | 1.210 | 0.1132        | 14.5      |
| Gm12253  | <tm1a(KOMP)Wtsi>                  | C57BL/6NTac   | Homozygote   | M | 187 | 49  | 21 | 208 | 36  | 7  | 1.112 | 0.4901        | 60        |
| Gm13119  | <tm2b(KOMP)Wtsi>                  | C57BL/6NTac   | Homozygote   | M | 120 | 56  | 22 | 125 | 17  | 4  | 1.042 | 0.3934        | 31.5      |
| Gm13125  | <tm1b(KOMP)Wtsi>                  | C57BL/6NTac   | Homozygote   | M | 213 | 58  | 22 | 194 | 27  | 6  | 0.911 | 0.654         | 57.5      |
| Gm16379  | <tm1a(KOMP)Wtsi>                  | C57BL/6NTac   | Homozygote   | F | 273 | 60  | 19 | 284 | 49  | 6  | 1.040 | 0.75          | 51.5      |
| Gm16432  | <tm1a(KOMP)Wtsi>                  | C57BL/6NTac   | Homozygote   | M | 115 | 34  | 19 | 155 | 36  | 4  | 1.348 | 0.0884        | 16.5      |
| Gm5544   | <tm1a(KOMP)Wtsi>                  | C57BL/6NTac   | Heterozygote | M | 147 | 67  | 16 | 107 | 10  | 5  | 0.728 | 0.5355        | 32        |
| Gm648    | <tm1e(KOMP)Wtsi>                  | C57BL/6NTac   | Homozygote   | F | 139 | 41  | 18 | 103 | 39  | 9  | 0.741 | 0.0448        | 41.5      |
| Gm6578   | <tm1a(KOMP)Wtsi>                  | C57BL/6NTac   | Homozygote   | M | 107 | 36  | 20 | 116 | 27  | 9  | 1.084 | 0.3454        | 69.5      |
| Gmds     | <tm1a(KOMP)Wtsi>                  | C57BL/6NTac   | Homozygote   | M | 234 | 106 | 17 | 232 | 106 | 7  | 0.991 | 0.9747        | 59.5      |
| Gmnc     | <tm1b(KOMP)Wtsi>                  | C57BL/6NTac   | Heterozygote | M | 144 | 28  | 13 | 145 | 33  | 4  | 1.007 | 0.8651        | 24        |
| Gnb3     | <tm1b(EUCOMM)Wtsi>                | C57BL/6NTac   | Homozygote   | M | 119 | 29  | 17 | 215 | 17  | 3  | 1.807 | 0.0081        | 0         |
| Gpatch1  | <em2Wtsi>                         | C57BL/6NTac   | Heterozygote | M | 147 | 38  | 23 | 116 | 36  | 5  | 0.789 | 0.1495        | 33        |
| Gpbp1/1  | <tm1a(EUCOMM)Wtsi>                | C57BL/6NTac   | Homozygote   | F | 150 | 43  | 21 | 154 | 19  | 3  | 1.027 | 0.8272        | 28.5      |
| Gpc5     | <tm1a(KOMP)Wtsi>                  | C57BL/6NTac   | Homozygote   | F | 270 | 86  | 14 | 250 | 52  | 8  | 0.926 | 0.4522        | 44.5      |
| Gpr107   | <tm1a(KOMP)Wtsi>                  | C57BL/6NTac   | Homozygote   | F | 205 | 29  | 12 | 194 | 56  | 5  | 0.946 | 0.8324        | 27.5      |
| Gpr133   | <tm1b(EUCOMM)Wtsi>                | C57BL/6NTac   | Homozygote   | F | 236 | 60  | 10 | 226 | 46  | 5  | 0.958 | 0.8063        | 22.5      |
| Gpr152   | <tm1b(EUCOMM)Wtsi>                | C57BL/6NTac   | Homozygote   | M | 124 | 28  | 10 | 151 | 73  | 5  | 1.218 | 1             | 25        |
| Gpr35    | <tm1b(EUCOMM)Hmgu>                | C57BL/6NTac   | Homozygote   | M | 170 | 50  | 28 | 165 | 20  | 6  | 0.971 | 0.6513        | 73.5      |
| Grb7     | <tm1b(EUCOMM)Wtsi>                | C57BL/6NTac   | Homozygote   | F | 200 | 53  | 13 | 190 | 46  | 7  | 0.950 | 0.7213        | 40.5      |
| Grm8     | <tm2a(KOMP)Wtsi>                  | C57BL/6NTac   | Homozygote   | F | 186 | 45  | 10 | 245 | 13  | 3  | 1.317 | 0.0516        | 3         |
| Grsf1    | <tm1b(EUCOMM)Wtsi>                | C57BL/6NTac   | Homozygote   | M | 111 | 35  | 25 | 69  | 20  | 5  | 0.622 | 0.0154        | 18.5      |
| Gsto2    | <tm2a(KOMP)Wtsi>                  | C57BL/6NTac   | Homozygote   | F | 245 | 67  | 21 | 243 | 68  | 3  | 0.992 | 0.8614        | 29        |
| Gtf2a1   | <tm1a(KOMP)Wtsi>                  | C57BL/6NTac   | Heterozygote | M | 142 | 39  | 13 | 103 | 25  | 3  | 0.725 | 0.1059        | 7         |
| Gtf2h2   | <tm1a(EUCOMM)Wtsi>                | C57BL/6NTac   | Heterozygote | M | 87  | 40  | 24 | 81  | 20  | 3  | 0.931 | 0.8772        | 33.5      |
| Gtpbp3   | <tm1a(KOMP)Wtsi>                  | C57BL/6NTac   | Heterozygote | M | 90  | 21  | 19 | 127 | 40  | 7  | 1.411 | 0.0129        | 23        |
| H2-Eb1   | <tm1a(KOMP)Wtsi>                  | C57BL/6NTac   | Homozygote   | F | 142 | 39  | 11 | 142 | 19  | 6  | 1.000 | 0.9599        | 33        |
| Hacl1    | <tm1a(KOMP)Wtsi>                  | C57BL/6NTac   | Homozygote   | F | 210 | 55  | 11 | 148 | 58  | 4  | 0.705 | 0.1333        | 10        |
| Hao2     | <em1Wtsi>                         | C57BL/6NTac   | Homozygote   | M | 70  | 23  | 22 | 80  | 25  | 4  | 1.143 | 0.6958        | 38        |
| Hbs1/1   | <tm1a(KOMP)Wtsi>                  | C57BL/6NTac   | Homozygote   | M | 97  | 34  | 24 | 99  | 7   | 7  | 1.021 | 0.5704        | 71.5      |
| Hdac8    | <tm1a(EUCOMM)Wtsi>                | C57BL/6NTac   | Homozygote   | M | 227 | 36  | 13 | 222 | 21  | 5  | 0.978 | 0.6928        | 28        |
| Hecw2    | <tm1a(EUCOMM)Wtsi>                | C57BL/6NTac   | Heterozygote | M | 113 | 42  | 17 | 121 | 71  | 3  | 1.071 | 0.9577        | 25.5      |
| Herc1    | <em4Wtsi> (T1696G point mutation) | C57BL/6NTac   | Homozygote   | F | 114 | 23  | 18 | 108 | 20  | 5  | 0.947 | 0.5507        | 36.5      |
| Hibadh   | <tm1b(EUCOMM)Wtsi>                | C57BL/6NTac   | Homozygote   | M | 137 | 44  | 18 | 123 | 40  | 5  | 0.898 | 0.5019        | 35.5      |
| Hmgxb3   | <tm1a(EUCOMM)Wtsi>                | C57BL/6NTac   | Heterozygote | F | 182 | 55  | 24 | 213 | 30  | 5  | 1.170 | 0.2365        | 39        |
| Homez    | <tm1e(KOMP)Wtsi>                  | C57BL/6NTac   | Homozygote   | M | 119 | 29  | 17 | 108 | 30  | 4  | 0.908 | 0.5602        | 27        |
| Hrsp12   | <tm1a(KOMP)Wtsi>                  | C57BL/6NTac   | Homozygote   | M | 152 | 57  | 24 | 143 | 51  | 5  | 0.941 | 0.7949        | 55        |
| Hsp90aa1 | <tm1(KOMP)Wtsi>                   | C57BL/6NTac   | Homozygote   | F | 247 | 47  | 15 | 135 | 23  | 4  | 0.547 | 0.0031        | 0         |
| Ido1     | <tm1a(EUCOMM)Wtsi>                | C57BL/6NTac   | Homozygote   | F | 213 | 58  | 12 | 284 | 100 | 4  | 1.333 | 0.1296        | 11        |
| Ifi27    | <tm1b(EUCOMM)Wtsi>                | C57BL/6NTac   | Homozygote   | M | 127 | 25  | 30 | 127 | 42  | 7  | 1.000 | 0.9381        | 102.5     |
| Ifitm3   | <tm1Masu>                         | C57/129 mixed | Homozygote   | F | 177 | 58  | 12 | 207 | 28  | 15 | 1.169 | 0.1718        | 61.5      |
| Ifitm6   | <tm1b(EUCOMM)Wtsi>                | C57BL/6NTac   | Homozygote   | M | 150 | 39  | 18 | 194 | 63  | 5  | 1.293 | 0.0799        | 21        |
| Ifnar1   | <tm2a(EUCOMM)Wtsi>                | C57BL/6NTac   | Homozygote   | F | 352 | 93  | 20 | 438 | 94  | 5  | 1.244 | 0.0832        | 24        |
| Ifnlr1   | <tm1a(EUCOMM)Wtsi>                | C57BL/6NTac   | Homozygote   | M | 149 | 46  | 20 | 145 | 52  | 4  | 0.973 | 0.8161        | 36.5      |
| Ifi140   | <tm1a(KOMP)Wtsi>                  | C57BL/6NTac   | Heterozygote | F | 219 | 49  | 19 | 187 | 49  | 4  | 0.854 | 0.2911        | 24.5      |



|                |                                 |                                                |                   |          |            |           |           |            |           |          |              |               |            |
|----------------|---------------------------------|------------------------------------------------|-------------------|----------|------------|-----------|-----------|------------|-----------|----------|--------------|---------------|------------|
| <i>Ift80</i>   | <tm1a(KOMP)Wtsi>                | C57BL/6NTac                                    | Homozygote        | F        | 222        | 55        | 13        | 199        | 62        | 5        | 0.896        | 0.621         | 27         |
| <b>Ighm</b>    | <b>&lt;tm1(Cgn)&gt;</b>         | <b>C57BL/6J</b>                                | <b>Homozygote</b> | <b>F</b> | <b>205</b> | <b>94</b> | <b>9</b>  | <b>339</b> | <b>34</b> | <b>5</b> | <b>1.654</b> | <b>0.0092</b> | <b>2.5</b> |
| <i>Ii10rb</i>  | <tm1a(KOMP)Wtsi>                | C57BL/6NTac                                    | Homozygote        | F        | 192        | 45        | 19        | 171        | 97        | 4        | 0.891        | 0.3503        | 26         |
| <i>Ii17re</i>  | <tm1b(EUCOMM)Wtsi>              | C57BL/6NTac                                    | Homozygote        | M        | 128        | 36        | 20        | 125        | 27        | 4        | 0.977        | 0.8768        | 37.5       |
| <i>Ii18rap</i> | <em1Wtsi>                       | C57BL/6NTac                                    | Homozygote        | M        | 205        | 45        | 23        | 224        | 45        | 6        | 1.093        | 0.37670       | 52.0       |
| <i>Ii1r2</i>   | <tm1a(EUCOMM)Wtsi>              | C57BL/6NTac                                    | Homozygote        | F        | 206        | 55        | 17        | 233        | 33        | 5        | 1.131        | 0.3673        | 30.5       |
| <i>Ii22ra1</i> | <tm1a(EUCOMM)Wtsi>              | C57BL/6NTac                                    | Homozygote        | F        | 200        | 47        | 16        | 211        | 19        | 4        | 1.055        | 0.4475        | 23.5       |
| <i>Ii23r</i>   | <tm2a(EUCOMM)Wtsi>              | C57BL/6NTac                                    | Homozygote        | M        | 168        | 54        | 13        | 213        | 23        | 4        | 1.268        | 0.1567        | 13         |
| <i>Iidr1</i>   | <tm1b(KOMP)Wtsi>                | C57BL/6NTac                                    | Homozygote        | F        | 179        | 50        | 23        | 135        | 57        | 5        | 0.754        | 0.0818        | 28         |
| <i>Ints2</i>   | <tm1a(KOMP)Wtsi>                | C57BL/6NTac                                    | Heterozygote      | F        | 206        | 43        | 21        | 228        | 57        | 6        | 1.107        | 0.2082        | 44         |
| <i>Irak1</i>   | <tm1a(EUCOMM)HgmU>              | C57BL/6NTac                                    | Homozygote        | M        | 118        | 38        | 18        | 113        | 32        | 4        | 0.958        | 1             | 35.5       |
| <b>Irf1</b>    | <b>&lt;tm1a(EUCOMM)Wtsi&gt;</b> | <b>C57BL/6Brd-Tyr, C57BL/6Dnk, C57BL/6NTac</b> | <b>Homozygote</b> | <b>F</b> | <b>160</b> | <b>41</b> | <b>6</b>  | <b>383</b> | <b>32</b> | <b>3</b> | <b>2.394</b> | <b>0.0238</b> | <b>0</b>   |
| <i>Irf5</i>    | <tm1e(EUCOMM)Wtsi>              | C57BL/6NTac                                    | Homozygote        | F        | 150        | 41        | 12        | 174        | 47        | 4        | 1.160        | 0.3316        | 15.5       |
| <b>Irf7</b>    | <b>&lt;tm1(KOMP)Wtsi&gt;</b>    | <b>C57BL/6NTac</b>                             | <b>Homozygote</b> | <b>F</b> | <b>156</b> | <b>12</b> | <b>57</b> | <b>288</b> | <b>97</b> | <b>9</b> | <b>1.846</b> | <b>0.0031</b> | <b>12</b>  |
| <i>Isg20</i>   | <tm1a(KOMP)Wtsi>                | C57BL/6NTac                                    | Homozygote        | M        | 151        | 58        | 12        | 161        | 34        | 7        | 1.066        | 0.6391        | 36         |
| <i>Itn1</i>    | <em1Wtsi>                       | C57BL/6NTac                                    | Homozygote        | M        | 203        | 60        | 20        | 159        | 45        | 6        | 0.783        | 0.128         | 34.5       |
| <i>Izumo1r</i> | <tm2a(KOMP)Wtsi>                | C57BL/6NTac                                    | Homozygote        | M        | 124        | 21        | 11        | 120        | 7         | 5        | 0.968        | 0.6099        | 22.5       |
| <i>Jhdm1d</i>  | <tm1a(EUCOMM)Wtsi>              | C57BL/6NTac                                    | Homozygote        | F        | 156        | 46        | 18        | 166        | 25        | 5        | 1.064        | 0.7089        | 39.5       |
| <i>Jmjd1c</i>  | <tm1a(EUCOMM)Wtsi>              | C57BL/6NTac                                    | Heterozygote      | F        | 206        | 43        | 21        | 171        | 42        | 8        | 0.830        | 0.0573        | 47         |
| <i>Josd1</i>   | <em2Wtsi>                       | C57BL/6NTac                                    | Homozygote        | F        | 114        | 23        | 18        | 124        | 31        | 5        | 1.088        | 0.4787        | 35         |
| <i>Kcqh4</i>   | <tm1b(KOMP)Wtsi>                | C57BL/6NTac                                    | Homozygote        | M        | 127        | 25        | 30        | 144        | 55        | 3        | 1.134        | 0.3975        | 31         |
| <i>Kcnp4</i>   | <tm1a(KOMP)Wtsi>                | C57BL/6NTac                                    | Homozygote        | F        | 291        | 60        | 10        | 322        | 73        | 5        | 1.107        | 0.623         | 20.5       |
| <i>Kdm4d</i>   | <tm2a(EUCOMM)Wtsi>              | C57BL/6NTac                                    | Homozygote        | F        | 144        | 63        | 5         | 106        | 66        | 5        | 0.736        | 0.4206        | 8          |
| <i>Kera</i>    | <em1Wtsi>                       | C57BL/6NTac                                    | Homozygote        | M        | 132        | 38        | 32        | 157        | 40        | 5        | 1.189        | 0.4551        | 62.5       |
| <i>Kif13b</i>  | <tm1b(EUCOMM)Wtsi>              | C57BL/6NTac                                    | Homozygote        | M        | 170        | 50        | 22        | 182        | 4         | 5        | 1.071        | 0.7787        | 50         |
| <i>Kif18b</i>  | <tm1a(EUCOMM)Wtsi>              | C57BL/6NTac                                    | Heterozygote      | M        | 109        | 42        | 18        | 92         | 57        | 4        | 0.844        | 0.443         | 26.5       |
| <i>Kif24</i>   | <tm1b(KOMP)Wtsi>                | C57BL/6NTac                                    | Homozygote        | M        | 83         | 29        | 26        | 90         | 2         | 4        | 1.084        | 0.6694        | 41         |
| <i>Kif3b</i>   | <tm1b(EUCOMM)Wtsi>              | C57BL/6NTac                                    | Heterozygote      | F        | 164        | 36        | 13        | 138        | 30        | 7        | 0.841        | 0.1319        | 26         |
| <i>Kifap3</i>  | <tm1a(KOMP)Wtsi>                | C57BL/6NTac                                    | Heterozygote      | F        | 166        | 45        | 16        | 146        | 32        | 4        | 0.880        | 0.5075        | 24.5       |
| <i>Klc2</i>    | <tm1e(EUCOMM)Wtsi>              | C57BL/6NTac                                    | Homozygote        | M        | 123        | 65        | 9         | 108        | 52        | 5        | 0.878        | 0.7386        | 15         |
| <i>Klf17</i>   | <tm1b(KOMP)Wtsi>                | C57BL/6NTac                                    | Homozygote        | M        | 294        | 51        | 10        | 261        | 85        | 5        | 0.888        | 0.5941        | 20         |
| <i>Klh18</i>   | <tm1a(KOMP)Wtsi>                | C57BL/6NTac                                    | Homozygote        | F        | 259        | 46        | 13        | 215        | 80        | 4        | 0.830        | 0.2113        | 14.5       |
| <i>Klh21</i>   | <tm1a(KOMP)Wtsi>                | C57BL/6NTac                                    | Heterozygote      | M        | 165        | 46        | 11        | 163        | 46        | 9        | 0.988        | 1             | 49         |
| <i>Klh30</i>   | <tm1a(KOMP)Wtsi>                | C57BL/6NTac                                    | Homozygote        | M        | 72         | 29        | 23        | 47         | 16        | 4        | 0.653        | 0.0877        | 20.5       |
| <i>Klk5</i>    | <tm2a(KOMP)Wtsi>                | C57BL/6NTac                                    | Homozygote        | M        | 159        | 55        | 28        | 136        | 18        | 3        | 0.855        | 0.3323        | 27         |
| <i>Klk9</i>    | <tm1a(KOMP)Wtsi>                | C57BL/6NTac                                    | Homozygote        | F        | 205        | 29        | 12        | 222        | 52        | 5        | 1.083        | 0.711         | 26         |
| <i>Klrb1a</i>  | <tm1a(KOMP)Wtsi>                | C57BL/6NTac                                    | Homozygote        | F        | 158        | 49        | 18        | 165        | 53        | 4        | 1.044        | 0.8647        | 33.5       |
| <i>Kptn</i>    | <tm1a(EUCOMM)Wtsi>              | C57BL/6NTac                                    | Homozygote        | F        | 249        | 53        | 18        | 202        | 48        | 9        | 0.811        | 0.0604        | 44         |
| <i>Krt31</i>   | <tm1e(KOMP)Wtsi>                | C57BL/6NTac                                    | Homozygote        | M        | 124        | 21        | 11        | 121        | 37        | 5        | 0.976        | 1             | 27         |
| <i>Krt7</i>    | <tm1b(KOMP)Wtsi>                | C57BL/6NTac                                    | Homozygote        | F        | 156        | 46        | 18        | 165        | 65        | 8        | 1.058        | 0.6564        | 63.5       |
| <i>L3mbt2</i>  | <tm1e(EUCOMM)Wtsi>              | C57BL/6NTac                                    | Heterozygote      | M        | 218        | 45        | 18        | 158        | 48        | 5        | 0.725        | 0.0253        | 14.5       |
| <i>Lacc1</i>   | <tm1a(KOMP)Wtsi>                | C57BL/6NTac                                    | Homozygote        | F        | 231        | 63        | 9         | 176        | 61        | 7        | 0.762        | 0.0712        | 14         |
| <i>Lars</i>    | <tm1b(KOMP)Wtsi>                | C57BL/6NTac                                    | Heterozygote      | F        | 185        | 35        | 25        | 206        | 56        | 4        | 1.114        | 0.2683        | 32         |
| <i>Lce1m</i>   | <tm1b(EUCOMM)Wtsi>              | C57BL/6NTac                                    | Homozygote        | M        | 151        | 64        | 20        | 164        | 25        | 4        | 1.086        | 0.7565        | 35.5       |
| <i>Lce3c</i>   | <tm2a(EUCOMM)Wtsi>              | C57BL/6NTac                                    | Homozygote        | F        | 275        | 53        | 21        | 278        | 16        | 3        | 1.011        | 0.8621        | 29         |
| <i>Ldhb</i>    | <tm1b(KOMP)Wtsi>                | C57BL/6NTac                                    | Homozygote        | M        | 83         | 29        | 26        | 106        | 22        | 6        | 1.277        | 0.0619        | 35.5       |
| <b>Ldlrad4</b> | <b>&lt;tm1b(EUCOMM)Wtsi&gt;</b> | <b>C57BL/6NTac</b>                             | <b>Homozygote</b> | <b>M</b> | <b>105</b> | <b>27</b> | <b>23</b> | <b>42</b>  | <b>12</b> | <b>3</b> | <b>0.400</b> | <b>0.0063</b> | <b>0</b>   |
| <i>Leo1</i>    | <tm1a(EUCOMM)Wtsi>              | C57BL/6NTac                                    | Heterozygote      | M        | 170        | 50        | 22        | 157        | 44        | 5        | 0.924        | 0.7549        | 49.5       |
| <i>Leprot</i>  | <tm2a(KOMP)Wtsi>                | C57BL/6NTac                                    | Homozygote        | F        | 277        | 60        | 6         | 324        | 44        | 5        | 1.170        | 0.1255        | 6          |
| <i>Lgals7</i>  | <tm1b(EUCOMM)Wtsi>              | C57BL/6NTac                                    | Homozygote        | F        | 277        | 62        | 11        | 271        | 41        | 7        | 0.978        | 0.4945        | 30.5       |
| <i>Lix1l</i>   | <tm1a(EUCOMM)Wtsi>              | C57BL/6NTac                                    | Heterozygote      | F        | 193        | 47        | 18        | 172        | 36        | 7        | 0.891        | 0.3319        | 46.5       |
| <i>Lmna</i>    | <G609G>                         | C57BL/6NTac                                    | Homozygote        | F        | 152        | 51        | 19        | 158        | 11        | 6        | 1.039        | 0.8236        | 53         |
| <i>Lonrf3</i>  | <tm1a(KOMP)Wtsi>                | C57BL/6NTac                                    | Homozygote        | M        | 113        | 42        | 17        | 142        | 73        | 3        | 1.257        | 0.6352        | 18         |
| <i>Lpxn</i>    | <tm1b(EUCOMM)HgmU>              | C57BL/6NTac                                    | Homozygote        | M        | 109        | 24        | 20        | 80         | 40        | 6        | 0.734        | 0.0479        | 27         |
| <b>Lrig1</b>   | <b>&lt;tm1a(EUCOMM)Wtsi&gt;</b> | <b>C57BL/6NTac</b>                             | <b>Homozygote</b> | <b>M</b> | <b>182</b> | <b>53</b> | <b>14</b> | <b>24</b>  | <b>8</b>  | <b>3</b> | <b>0.132</b> | <b>0.0098</b> | <b>0</b>   |
| <i>Lrrc23</i>  | <tm1a(EUCOMM)Wtsi>              | C57BL/6NTac                                    | Homozygote        | M        | 188        | 49        | 23        | 207        | 27        | 3        | 1.101        | 0.47          | 0.25       |
| <i>Lrrc71</i>  | <tm1a(KOMP)Wtsi>                | C57BL/6NTac                                    | Homozygote        | M        | 134        | 39        | 20        | 126        | 23        | 3        | 0.940        | 0.7492        | 26         |

|                                         |                    |                         |              |   |     |    |    |     |    |   |       |        |      |
|-----------------------------------------|--------------------|-------------------------|--------------|---|-----|----|----|-----|----|---|-------|--------|------|
| Lrrc8d                                  | <tm1a(EUCOMM)Wtsi> | C57BL/6NTac             | Homozygote   | M | 159 | 55 | 28 | 151 | 52 | 3 | 0.950 | 0.9467 | 40.5 |
| Lyplal1                                 | <tm1a(KOMP)Wtsi>   | C57BL/6NTac             | Homozygote   | M | 137 | 32 | 19 | 121 | 5  | 4 | 0.883 | 0.3302 | 25.5 |
| Lymr9                                   | <tm1a(KOMP)Mbp>    | C57BL/6NTac             | Homozygote   | M | 159 | 46 | 17 | 183 | 66 | 3 | 1.151 | 0.5252 | 19   |
| Macrocl1                                | <em1Wtsi>          | C57BL/6NTac             | Homozygote   | M | 132 | 30 | 26 | 109 | 13 | 6 | 0.826 | 0.0627 | 39   |
| Mamstr                                  | <tm1b(EUCOMM)Wtsi> | C57BL/6NTac             | Homozygote   | F | 185 | 48 | 16 | 186 | 43 | 6 | 1.005 | 0.8247 | 44.5 |
| Man2b2                                  | <tm1b(KOMP)Wtsi>   | C57BL/6NTac             | Homozygote   | F | 273 | 60 | 19 | 241 | 38 | 4 | 0.883 | 0.2912 | 24.5 |
| Map2k7                                  | <tm1a(EUCOMM)Wtsi> | C57BL/6NTac             | Heterozygote | F | 229 | 57 | 16 | 232 | 57 | 8 | 1.013 | 0.8301 | 60   |
| Map3k1                                  | <tm1a(KOMP)Wtsi>   | C57BL/6NTac             | Heterozygote | M | 117 | 31 | 11 | 122 | 32 | 4 | 1.043 | 0.7441 | 19   |
| Mast2                                   | <tm1a(KOMP)Wtsi>   | C57BL/6NTac             | Homozygote   | F | 196 | 56 | 20 | 153 | 37 | 4 | 0.781 | 0.2141 | 23.5 |
| Mau2                                    | <tm1b(KOMP)Wtsi>   | C57BL/6NTac             | Heterozygote | F | 169 | 55 | 17 | 128 | 19 | 3 | 0.757 | 0.1121 | 10   |
| Mbl2                                    | <em1Wtsi>          | C57BL/6NTac             | Homozygote   | M | 155 | 43 | 27 | 174 | 53 | 4 | 1.123 | 0.498  | 42   |
| Mcf2l                                   | <tm1a(EUCOMM)Hmgu> | C57BL/6NTac             | Homozygote   | F | 200 | 47 | 16 | 187 | 69 | 7 | 0.935 | 0.6631 | 49   |
| Med22                                   | <tm1a(EUCOMM)Wtsi> | C57BL/6NTac             | Heterozygote | M | 174 | 50 | 24 | 176 | 46 | 4 | 1.011 | 0.7175 | 42   |
| Med23                                   | <em1Wtsi>          | C57BL/6NTac             | Heterozygote | M | 155 | 43 | 27 | 127 | 27 | 5 | 0.819 | 0.161  | 40   |
| Medag                                   | <tm2b(KOMP)Wtsi>   | C57BL/6NTac             | Homozygote   | F | 236 | 60 | 10 | 267 | 45 | 3 | 1.131 | 0.4984 | 10.5 |
| Mep1a                                   | <tm1a(KOMP)Wtsi>   | C57BL/6NTac             | Homozygote   | M | 132 | 30 | 26 | 105 | 24 | 5 | 0.795 | 0.0718 | 31   |
| Metrl                                   | <tm1b(KOMP)Wtsi>   | C57BL/6NTac             | Homozygote   | F | 203 | 42 | 16 | 211 | 45 | 5 | 1.039 | 0.62   | 33.5 |
| Mettl24                                 | <tm1a(KOMP)Wtsi>   | C57BL/6NTac             | Homozygote   | F | 185 | 73 | 17 | 167 | 51 | 5 | 0.903 | 0.5829 | 35   |
| Mgat4c                                  | <tm1a(EUCOMM)Wtsi> | C57BL/6NTac             | Homozygote   | M | 109 | 42 | 18 | 82  | 14 | 4 | 0.752 | 0.2671 | 22.5 |
| Micu2                                   | <tm1a(EUCOMM)Wtsi> | C57BL/6NTac             | Homozygote   | M | 141 | 25 | 22 | 131 | 37 | 5 | 0.929 | 0.5733 | 45.5 |
| Mier1                                   | <tm1a(EUCOMM)Wtsi> | C57BL/6NTac             | Homozygote   | F | 274 | 96 | 20 | 214 | 63 | 4 | 0.781 | 0.0956 | 18   |
| mir122                                  | <tm1Brd>           | C57BL/6NTac             | Homozygote   | M | 143 | 49 | 28 | 101 | 34 | 4 | 0.706 | 0.1462 | 30   |
| mir145                                  | <tm1Brd>           | C57BL/6NTac             | Heterozygote | F | 160 | 44 | 19 | 146 | 62 | 4 | 0.913 | 0.5159 | 29.5 |
| mir210                                  | <tm1Brd>           | C57BL/6NTac             | Homozygote   | F | 179 | 50 | 23 | 186 | 40 | 5 | 1.039 | 0.7642 | 52   |
| mir211                                  | <tm1Brd>           | C57BL/6NTac             | Homozygote   | M | 155 | 40 | 21 | 134 | 14 | 5 | 0.865 | 0.2821 | 35.5 |
| mir32                                   | <tm1Brd>           | C57BL/6NTac             | Homozygote   | M | 104 | 39 | 21 | 101 | 16 | 6 | 0.971 | 0.9767 | 62   |
| mir342                                  | <tm1Brd>           | C57BL/6NTac             | Homozygote   | M | 111 | 33 | 19 | 123 | 30 | 6 | 1.108 | 0.4079 | 43.5 |
| mir34a                                  | <tm1Brd>           | C57BL/6NTac             | Homozygote   | F | 150 | 43 | 21 | 122 | 51 | 4 | 0.813 | 0.3939 | 30   |
| mir96                                   | <tm2.1Wtsi>        | C57BL/6NTac             | Heterozygote | M | 136 | 44 | 21 | 125 | 21 | 5 | 0.919 | 0.5364 | 42.5 |
| mir-96, mir-183 ('cluster6N1')          | <tm1Brd>           | C57BL/6NTac             | Homozygote   | M | 170 | 50 | 22 | 223 | 27 | 3 | 1.312 | 0.1028 | 13   |
| mir-25, mir-93, mir-106b ('cluster5N1') | <tm1Brd>           | C57BL/6NTac             | Homozygote   | M | 111 | 35 | 25 | 113 | 20 | 8 | 1.018 | 1      | 99.5 |
| mir-18b, mir-106a ('clusterXN1')        | <tm1Brd>           | C57BL/6NTac             | Homozygote   | M | 95  | 30 | 18 | 87  | 23 | 4 | 0.916 | 0.6093 | 29.5 |
| Mkrm2                                   | <tm1b(KOMP)Wtsi>   | C57BL/6NTac             | Homozygote   | M | 122 | 36 | 13 | 149 | 33 | 4 | 1.221 | 0.1918 | 14   |
| Mospd1                                  | <tm1a(KOMP)Wtsi>   | C57BL/6NTac             | Homozygote   | M | 218 | 45 | 18 | 198 | 55 | 5 | 0.908 | 0.4788 | 35   |
| Mpg                                     | <tm1a(EUCOMM)Wtsi> | C57BL/6NTac             | Homozygote   | M | 209 | 49 | 14 | 195 | 48 | 3 | 0.933 | 0.8008 | 18.5 |
| Mrm1                                    | <tm2a(EUCOMM)Wtsi> | C57BL/6NTac             | Homozygote   | F | 203 | 42 | 16 | 178 | 41 | 6 | 0.877 | 0.1842 | 29.5 |
| Mroh4                                   | <tm1b(KOMP)Wtsi>   | C57BL/6NTac             | Homozygote   | F | 174 | 42 | 19 | 209 | 59 | 4 | 1.201 | 0.3506 | 26   |
| Mroh9                                   | <tm1a(EUCOMM)Wtsi> | C57BL/6NTac             | Homozygote   | M | 133 | 43 | 25 | 164 | 26 | 6 | 1.233 | 0.1273 | 44   |
| Mrps21                                  | <tm1e(EUCOMM)Wtsi> | C57BL/6NTac             | Heterozygote | M | 94  | 28 | 24 | 95  | 42 | 3 | 1.011 | 1      | 35.5 |
| Mrps5                                   | <tm1b(EUCOMM)Wtsi> | C57BL/6NTac             | Heterozygote | M | 215 | 48 | 17 | 262 | 71 | 4 | 1.219 | 0.3022 | 22   |
| Mtmt1                                   | <tm2a(EUCOMM)Wtsi> | C57BL/6NTac             | Homozygote   | M | 170 | 50 | 28 | 156 | 34 | 6 | 0.918 | 0.366  | 63.5 |
| Mtss1l                                  | <tm1a(KOMP)Wtsi>   | C57BL/6NTac             | Homozygote   | M | 193 | 45 | 8  | 257 | 47 | 3 | 1.332 | 0.1521 | 4.5  |
| Mybphl                                  | <tm1a(KOMP)Wtsi>   | C57BL/6NTac             | Homozygote   | M | 193 | 45 | 8  | 173 | 41 | 5 | 0.896 | 0.5576 | 15.5 |
| Myd88                                   | <tm1a(EUCOMM)Wtsi> | C57BL/6NTac             | Homozygote   | F | 274 | 96 | 20 | 317 | 34 | 3 | 1.157 | 0.2937 | 18   |
| Myh14                                   | <tm1a(EUCOMM)Wtsi> | C57BL/6NTac             | Homozygote   | F | 193 | 47 | 18 | 200 | 47 | 6 | 1.036 | 0.9467 | 52.5 |
| Myh7b                                   | <tm1a(KOMP)Wtsi>   | C57BL/6NTac             | Homozygote   | M | 141 | 25 | 22 | 135 | 19 | 7 | 0.957 | 0.4907 | 63   |
| Myo10                                   | <tm2(KOMP)Wtsi>    | C57BL/6NTac             | Homozygote   | M | 197 | 50 | 13 | 178 | 22 | 5 | 0.904 | 0.5211 | 25.5 |
| Myo7a                                   | <tm1a(EUCOMM)Wtsi> | C57BL/6NTac             | Homozygote   | M | 220 | 54 | 5  | 127 | 35 | 4 | 0.577 | 0.0491 | 1.5  |
| Myo9a                                   | <tm1b(EUCOMM)Wtsi> | C57BL/6NTac             | Heterozygote | F | 200 | 53 | 13 | 200 | 50 | 8 | 1.000 | 0.9422 | 50.5 |
| Mysm1                                   | <tm1a(KOMP)Wtsi>   | C57BL/6Dnk, C57BL/6NTac | Heterozygote | F | 224 | 51 | 4  | 207 | 58 | 6 | 0.924 | 0.8307 | 10.5 |
| Myt1l                                   | <tm1a(EUCOMM)Wtsi> | C57BL/6NTac             | Homozygote   | M | 181 | 59 | 16 | 159 | 67 | 5 | 0.878 | 0.4285 | 31   |
| N6amt2                                  | <tm1a(EUCOMM)Wtsi> | C57BL/6NTac             | Homozygote   | F | 160 | 44 | 19 | 200 | 40 | 4 | 1.250 | 0.1554 | 20   |
| Naaa                                    | <tm1a(KOMP)Wtsi>   | C57BL/6NTac             | Homozygote   | F | 139 | 41 | 18 | 137 | 30 | 8 | 0.986 | 0.9336 | 70   |
| Nacad                                   | <tm1(KOMP)Wtsi>    | C57BL/6NTac             | Homozygote   | F | 200 | 47 | 16 | 237 | 29 | 5 | 1.185 | 0.0895 | 19   |
| Nacc2                                   | <tm2b(EUCOMM)Wtsi> | C57BL/6NTac             | Homozygote   | M | 134 | 39 | 20 | 151 | 44 | 6 | 1.127 | 0.4651 | 47.5 |
| Nadk2                                   | <tm1b(EUCOMM)Wtsi> | C57BL/6NTac             | Heterozygote | M | 138 | 47 | 34 | 137 | 22 | 5 | 0.993 | 1      | 84.5 |
| Nat10                                   | <tm1a(KOMP)Wtsi>   | C57BL/6NTac             | Heterozygote | F | 173 | 49 | 13 | 200 | 84 | 4 | 1.156 | 0.4615 | 19   |

|               |                                 |                                         |                   |          |            |           |           |            |           |          |              |               |           |
|---------------|---------------------------------|-----------------------------------------|-------------------|----------|------------|-----------|-----------|------------|-----------|----------|--------------|---------------|-----------|
| Natd1         | <tm1b(EUCOMM)Wtsi>              | C57BL/6NTac                             | Homozygote        | F        | 168        | 45        | 18        | 193        | 36        | 5        | 1.149        | 0.2794        | 30        |
| <b>Nbeal2</b> | <b>&lt;tm1a(EUCOMM)Wtsi&gt;</b> | <b>C57BL/6NTac</b>                      | <b>Homozygote</b> | <b>F</b> | <b>197</b> | <b>54</b> | <b>10</b> | <b>44</b>  | <b>15</b> | <b>5</b> | <b>0.223</b> | <b>0.0007</b> | <b>0</b>  |
| <b>Ncf2</b>   | <b>&lt;tm1a(EUCOMM)Wtsi&gt;</b> | <b>C57BL/6NTac</b>                      | <b>Homozygote</b> | <b>M</b> | <b>138</b> | <b>47</b> | <b>34</b> | <b>69</b>  | <b>16</b> | <b>4</b> | <b>0.500</b> | <b>0.0062</b> | <b>10</b> |
| Ndufb8        | <tm1a(EUCOMM)Wtsi>              | C57BL/6NTac                             | Heterozygote      | F        | 203        | 42        | 16        | 219        | 37        | 4        | 1.079        | 0.5385        | 25        |
| Nebi          | <tm1b(EUCOMM)Wtsi>              | C57BL/6NTac                             | Homozygote        | M        | 128        | 36        | 20        | 133        | 31        | 7        | 1.039        | 0.6575        | 61.5      |
| Nek3          | <tm1b(EUCOMM)Wtsi>              | C57BL/6NTac                             | Homozygote        | F        | 125        | 41        | 24        | 135        | 37        | 7        | 1.080        | 0.3949        | 65.5      |
| Nek9          | <tm1a(EUCOMM)Wtsi>              | C57BL/6NTac                             | Heterozygote      | F        | 150        | 41        | 12        | 128        | 37        | 5        | 0.853        | 0.4932        | 23        |
| Nelfe         | <tm1a(EUCOMM)Wtsi>              | C57BL/6NTac                             | Heterozygote      | M        | 88         | 19        | 23        | 88         | 34        | 6        | 1.000        | 0.4666        | 55        |
| Nfkb1         | <tm1a(KOMP)Wtsi>                | C57BL/6Brd-Tyr, C57BL/6Dnk, C57BL/6NTac | Homozygote        | F        | 174        | 55        | 12        | 150        | 60        | 4        | 0.862        | 0.9031        | 22.5      |
| Nfkbil1       | <tm1a(KOMP)Wtsi>                | C57BL/6NTac                             | Homozygote        | M        | 143        | 43        | 21        | 137        | 28        | 6        | 0.958        | 0.7928        | 58        |
| Nfu1          | <tm1a(KOMP)Wtsi>                | C57BL/6NTac                             | Homozygote        | M        | 115        | 34        | 19        | 119        | 18        | 4        | 1.035        | 0.5162        | 29.5      |
| Ngrn          | <tm1a(KOMP)Wtsi>                | C57BL/6NTac                             | Heterozygote      | F        | 203        | 30        | 15        | 246        | 73        | 6        | 1.212        | 0.0671        | 21        |
| Nhlrc2        | <tm1a(KOMP)Wtsi>                | C57BL/6NTac                             | Heterozygote      | M        | 76         | 28        | 21        | 86         | 11        | 7        | 1.132        | 0.5241        | 61        |
| Nhp2          | <tm1a(KOMP)Wtsi>                | C57BL/6NTac                             | Heterozygote      | M        | 120        | 21        | 15        | 134        | 25        | 5        | 1.117        | 0.3364        | 26        |
| Ninj2         | <tm1a(KOMP)Wtsi>                | C57BL/6NTac                             | Homozygote        | F        | 176        | 39        | 7         | 193        | 32        | 3        | 1.097        | 0.7309        | 8.5       |
| Nipsnap3a     | <tm1b(KOMP)Wtsi>                | C57BL/6NTac                             | Homozygote        | M        | 155        | 40        | 21        | 158        | 72        | 4        | 1.019        | 0.9704        | 41        |
| Nme4          | <tm1a(EUCOMM)Wtsi>              | C57BL/6NTac                             | Homozygote        | F        | 213        | 54        | 14        | 187        | 81        | 6        | 0.878        | 0.5636        | 34.5      |
| Nmrk1         | <tm1a(KOMP)Wtsi>                | C57BL/6NTac                             | Homozygote        | M        | 147        | 54        | 18        | 102        | 43        | 7        | 0.694        | 0.0606        | 31.5      |
| Npat          | <tm1b(EUCOMM)Wtsi>              | C57BL/6NTac                             | Heterozygote      | M        | 156        | 37        | 24        | 165        | 48        | 4        | 1.058        | 0.5767        | 39        |
| Nrbp1         | <tm3a(EUCOMM)Wtsi>              | C57BL/6NTac                             | Heterozygote      | F        | 206        | 77        | 19        | 208        | 78        | 6        | 1.010        | 0.9746        | 57        |
| Nrde2         | <tm2a(KOMP)Wtsi>                | C57BL/6NTac                             | Heterozygote      | F        | 237        | 58        | 14        | 176        | 41        | 4        | 0.743        | 0.063         | 10        |
| Nubpl         | <tm1b(KOMP)Wtsi>                | C57BL/6NTac                             | Heterozygote      | M        | 213        | 58        | 22        | 207        | 48        | 5        | 0.972        | 0.8759        | cc18      |
| Nudt12        | <tm1a(KOMP)Wtsi>                | C57BL/6NTac                             | Homozygote        | M        | 182        | 53        | 14        | 210        | 28        | 6        | 1.154        | 0.248         | 27.5      |
| Nup85         | <tm1a(KOMP)Wtsi>                | C57BL/6NTac                             | Heterozygote      | M        | 294        | 51        | 10        | 282        | 46        | 5        | 0.959        | 0.5392        | 19.5      |
| Nutm2         | <tm2b(EUCOMM)Wtsi>              | C57BL/6NTac                             | Homozygote        | F        | 158        | 49        | 18        | 133        | 37        | 5        | 0.842        | 0.2049        | 27.5      |
| Nxn           | <tm1b(EUCOMM)Wtsi>              | C57BL/6NTac                             | Heterozygote      | M        | 218        | 45        | 18        | 153        | 36        | 4        | 0.702        | 0.0239        | 9         |
| Oaf           | <tm1a(EUCOMM)Wtsi>              | C57BL/6NTac                             | Homozygote        | F        | 206        | 77        | 19        | 178        | 67        | 5        | 0.864        | 0.5223        | 38        |
| Oas1g         | <tm3e(KOMP)Wtsi>                | C57BL/6NTac                             | Homozygote        | F        | 133        | 37        | 10        | 156        | 19        | 3        | 1.173        | 0.3506        | 9         |
| Ocm           | <tm1e(EUCOMM)Wtsi>              | C57BL/6NTac                             | Homozygote        | F        | 206        | 43        | 21        | 269        | 13        | 4        | 1.306        | 0.1044        | 8.5       |
| Ogdh          | <tm1e(KOMP)Wtsi>                | C57BL/6NTac                             | Heterozygote      | M        | 218        | 60        | 15        | 210        | 56        | 8        | 0.963        | 0.9228        | 58        |
| Olfir168      | <KO>                            | C57BL/6NTac                             | Heterozygote      | M        | 132        | 30        | 26        | 126        | 25        | 4        | 0.955        | 0.6915        | 45        |
| Oog2          | <tm1a(EUCOMM)Wtsi>              | C57BL/6NTac                             | Homozygote        | F        | 284        | 73        | 22        | 259        | 44        | 4        | 0.912        | 0.3189        | 29.5      |
| Orc1          | <tm1a(KOMP)Wtsi>                | C57BL/6NTac                             | Heterozygote      | F        | 206        | 55        | 17        | 178        | 34        | 4        | 0.864        | 0.3029        | 22        |
| Os9           | <tm1a(EUCOMM)Wtsi>              | C57BL/6NTac                             | Homozygote        | F        | 213        | 54        | 14        | 208        | 79        | 4        | 0.977        | 1             | 27.5      |
| Osbpl3        | <tm1a(EUCOMM)Wtsi>              | C57BL/6NTac                             | Homozygote        | M        | 112        | 34        | 10        | 107        | 38        | 4        | 0.955        | 1             | 19.5      |
| Otub2         | <tm1a(EUCOMM)Wtsi>              | C57BL/6NTac                             | Homozygote        | F        | 172        | 32        | 12        | 197        | 32        | 5        | 1.145        | 0.2042        | 17.5      |
| Otud7b        | <tm1b(EUCOMM)Wtsi>              | C57BL/6NTac                             | Heterozygote      | M        | 121        | 33        | 25        | 105        | 40        | 8        | 0.868        | 0.4239        | 80.5      |
| Oxr1          | <tm1a(EUCOMM)Wtsi>              | C57BL/6NTac                             | Heterozygote      | M        | 166        | 50        | 6         | 184        | 48        | 5        | 1.108        | 0.6623        | 12        |
| Pabpc4        | <tm1a(KOMP)Wtsi>                | C57BL/6NTac                             | Homozygote        | F        | 206        | 77        | 19        | 187        | 19        | 6        | 0.908        | 0.7264        | 51        |
| Pabpn1l       | <tm1a(EUCOMM)Wtsi>              | C57BL/6NTac                             | Homozygote        | F        | 247        | 54        | 18        | 233        | 38        | 8        | 0.943        | 0.2658        | 51.5      |
| Pam16         | <tm1b(EUCOMM)Wtsi>              | C57BL/6NTac                             | Heterozygote      | M        | 161        | 41        | 20        | 141        | 17        | 5        | 0.876        | 0.2088        | 31        |
| BC029214      | <em1(GB)Paxx>                   | C57BL/6NTac                             | Homozygote        | M        | 170        | 50        | 22        | 197        | 23        | 6        | 1.159        | 0.3002        | 47        |
| Pced1a        | <tm1b(EUCOMM)Wtsi>              | C57BL/6NTac                             | Homozygote        | F        | 236        | 60        | 10        | 252        | 66        | 3        | 1.068        | 0.6923        | 12        |
| Pdcd2         | <tm1b(EUCOMM)Wtsi>              | C57BL/6NTac                             | Heterozygote      | M        | 213        | 58        | 22        | 236        | 71        | 5        | 1.108        | 0.4727        | 43        |
| Pdia4         | <tm1b(EUCOMM)Wtsi>              | C57BL/6NTac                             | Homozygote        | M        | 240        | 51        | 15        | 230        | 32        | 5        | 0.958        | 0.5403        | 30        |
| Pdk3          | <tm2a(KOMP)Wtsi>                | C57BL/6NTac                             | Homozygote        | F        | 191        | 50        | 18        | 194        | 74        | 5        | 1.016        | 0.8814        | 42.5      |
| Pds5b         | <tm1a(EUCOMM)Wtsi>              | C57BL/6NTac                             | Heterozygote      | M        | 138        | 47        | 34        | 147        | 19        | 9        | 1.065        | 0.3244        | 119.5     |
| Pdxk          | <tm1a(EUCOMM)Wtsi>              | C57BL/6NTac                             | Heterozygote      | F        | 144        | 40        | 20        | 177        | 57        | 4        | 1.229        | 0.2778        | 25.5      |
| Pdzd3         | <tm1a(KOMP)Wtsi>                | C57BL/6NTac                             | Homozygote        | F        | 260        | 52        | 18        | 292        | 68        | 8        | 1.123        | 0.2315        | 50        |
| Pdzk1         | <tm2b(EUCOMM)Wtsi>              | C57BL/6NTac                             | Homozygote        | M        | 100        | 25        | 17        | 104        | 12        | 3        | 1.040        | 0.7505        | 22        |
| Pear1         | <tm1a(KOMP)Wtsi>                | C57BL/6NTac                             | Homozygote        | F        | 185        | 73        | 17        | 174        | 56        | 4        | 0.941        | 0.7535        | 30        |
| Pepd          | <tm1a(KOMP)Wtsi>                | C57BL/6NTac                             | Homozygote        | F        | 201        | 52        | 24        | 202        | 54        | 4        | 1.005        | 0.8954        | 45.5      |
| Pfkb4         | <tm1a(KOMP)Wtsi>                | C57BL/6NTac                             | Homozygote        | F        | 247        | 54        | 18        | 249        | 65        | 7        | 1.008        | 0.6067        | 54        |
| Pgap2         | <tm1b(EUCOMM)Wtsi>              | C57BL/6NTac                             | Heterozygote      | F        | 125        | 41        | 24        | 126        | 39        | 5        | 1.008        | 0.8624        | 56.5      |
| Pigf          | <tm1a(KOMP)Wtsi>                | C57BL/6NTac                             | Heterozygote      | M        | 110        | 31        | 18        | 102        | 34        | 5        | 0.927        | 0.7941        | 41        |
| Pigl          | <tm1b(KOMP)Wtsi>                | C57BL/6NTac                             | Heterozygote      | F        | 173        | 49        | 13        | 185        | 65        | 8        | 1.069        | 0.7719        | 47.5      |
| <b>Pik3cg</b> | <b>&lt;tm1a(EUCOMM)Wtsi&gt;</b> | <b>C57BL/6NTac</b>                      | <b>Homozygote</b> | <b>M</b> | <b>162</b> | <b>45</b> | <b>25</b> | <b>447</b> | <b>53</b> | <b>4</b> | <b>2.759</b> | <b>0.0017</b> | <b>0</b>  |

|          |                     |                                         |              |   |     |     |    |     |     |    |       |        |      |
|----------|---------------------|-----------------------------------------|--------------|---|-----|-----|----|-----|-----|----|-------|--------|------|
| Pitrm1   | <tm1a(KOMP)Wtsi>    | C57BL/6NTac                             | Heterozygote | M | 147 | 67  | 16 | 114 | 55  | 7  | 0.776 | 0.3844 | 42.5 |
| Pkhd1    | <del2>              | C57BL/6, 129S6/SvEvTac                  | Homozygote   | F | 101 | 31  | 10 | 96  | 41  | 4  | 0.950 | 0.8316 | 18   |
| Pla2g6   | <tm1a(EUCOMM)Wtsi>  | C57BL/6NTac                             | Homozygote   | M | 234 | 106 | 17 | 209 | 110 | 5  | 0.893 | 0.7539 | 38   |
| Pld3     | <tm1e(EUCOMM)Wtsi>  | C57BL/6NTac                             | Homozygote   | M | 116 | 26  | 21 | 107 | 22  | 10 | 0.922 | 0.3977 | 84.5 |
| Plekhhg1 | <tm1a(EUCOMM)Wtsi>  | C57BL/6NTac                             | Homozygote   | M | 128 | 28  | 14 | 117 | 31  | 3  | 0.914 | 0.7053 | 17.5 |
| Plet1    | <tm2b(KOMP)Wtsi>    | C57BL/6NTac                             | Homozygote   | F | 209 | 34  | 21 | 218 | 25  | 4  | 1.043 | 0.7383 | 37   |
| Pls3     | <tm1a(EUCOMM)Wtsi>  | C57BL/6NTac                             | Homozygote   | F | 185 | 73  | 17 | 125 | 22  | 3  | 0.676 | 0.168  | 12   |
| Plscr2   | <tm1b(KOMP)Wtsi>    | C57BL/6NTac                             | Homozygote   | F | 133 | 47  | 20 | 113 | 32  | 5  | 0.850 | 0.2622 | 33   |
| Plxna2   | <tm1a(EUCOMM)Wtsi>  | C57BL/6NTac                             | Homozygote   | F | 220 | 40  | 13 | 259 | 33  | 6  | 1.177 | 0.0789 | 18.5 |
| Plxnb3   | <tm1a(KOMP)Wtsi>    | C57BL/6NTac                             | Homozygote   | M | 127 | 45  | 17 | 110 | 20  | 5  | 0.866 | 0.7539 | 38   |
| Polb     | <tm1a(KOMP)Wtsi>    | C57BL/6NTac                             | Heterozygote | M | 147 | 54  | 18 | 153 | 25  | 5  | 1.041 | 0.7941 | 41   |
| Pold3    | <tm1b(EUCOMM)Wtsi>  | C57BL/6NTac                             | Heterozygote | M | 121 | 33  | 25 | 101 | 28  | 4  | 0.835 | 0.2964 | 33   |
| Polr3f   | <tm1a(EUCOMM)Wtsi>  | C57BL/6NTac                             | Heterozygote | F | 277 | 62  | 11 | 243 | 41  | 6  | 0.877 | 0.0559 | 13.5 |
| Polr3g   | <tm1a(EUCOMM)Wtsi>  | C57BL/6NTac                             | Heterozygote | M | 162 | 35  | 13 | 127 | 43  | 6  | 0.784 | 0.0591 | 17   |
| Pop4     | <tm1a(EUCOMM)Wtsi>  | C57BL/6NTac                             | Heterozygote | M | 191 | 66  | 26 | 168 | 70  | 6  | 0.880 | 0.7172 | 70   |
| Ppil3    | <tm1b(EUCOMM)Wtsi>  | C57BL/6NTac                             | Homozygote   | M | 112 | 34  | 10 | 107 | 23  | 4  | 0.955 | 0.9451 | 19   |
| Ppp6c    | <tm1a(EUCOMM)Hgmu>  | C57BL/6NTac                             | Heterozygote | F | 149 | 26  | 7  | 148 | 23  | 3  | 0.993 | 1      | 10   |
| Praf2    | <tm1e(EUCOMM)Wtsi>  | C57BL/6NTac                             | Homozygote   | F | 237 | 66  | 11 | 216 | 52  | 5  | 0.911 | 0.3072 | 18   |
| Prame    | <tm1a(KOMP)Wtsi>    | C57BL/6NTac                             | Homozygote   | M | 167 | 45  | 17 | 149 | 47  | 5  | 0.892 | 0.4558 | 32.5 |
| Prkab1   | <tm1b(KOMP)Wtsi>    | C57BL/6NTac                             | Homozygote   | F | 247 | 47  | 15 | 230 | 64  | 5  | 0.931 | 0.5395 | 30   |
| Prrc2b   | <tm1a(EUCOMM)Wtsi>  | C57BL/6NTac                             | Heterozygote | M | 161 | 76  | 20 | 184 | 58  | 4  | 1.143 | 0.4617 | 30   |
| Prrg2    | <tm1b(EUCOMM)Wtsi>  | C57BL/6NTac                             | Homozygote   | M | 168 | 54  | 13 | 128 | 27  | 4  | 0.762 | 0.1567 | 13   |
| Prrt2    | <tm1a(KOMP)Wtsi>    | C57BL/6NTac                             | Homozygote   | F | 157 | 69  | 27 | 181 | 36  | 5  | 1.153 | 0.6591 | 58.5 |
| Prss52   | <tm2a(KOMP)Wtsi>    | C57BL/6NTac                             | Homozygote   | M | 170 | 50  | 28 | 197 | 59  | 6  | 1.159 | 0.231  | 57   |
| Prss53   | <em2Wtsi>           | C57BL/6NTac                             | Homozygote   | M | 205 | 45  | 23 | 187 | 46  | 5  | 0.912 | 0.6518 | 49.5 |
| Psat1    | <tm1b(KOMP)Wtsi>    | C57BL/6NTac                             | Heterozygote | M | 141 | 36  | 23 | 114 | 30  | 5  | 0.809 | 0.1579 | 33.5 |
| Dlg4     | <tm1Grnt>           | C57BL/6;129                             | Homozygote   | M | 108 | 32  | 9  | 112 | 50  | 3  | 1.037 | 0.9262 | 12.5 |
| Psph     | <tm1a(EUCOMM)Hmgmu> | C57BL/6NTac                             | Heterozygote | M | 249 | 35  | 14 | 287 | 57  | 4  | 1.153 | 0.1844 | 15   |
| Pth      | <tm1a(EUCOMM)Wtsi>  | C57BL/6NTac                             | Homozygote   | F | 299 | 67  | 13 | 291 | 81  | 8  | 0.973 | 0.9422 | 50.5 |
| Pth1r    | <tm1a(EUCOMM)Hmgmu> | C57BL/6NTac                             | Heterozygote | M | 168 | 54  | 13 | 145 | 57  | 3  | 0.863 | 0.4192 | 13   |
| Pth2r    | <tm2a(KOMP)Wtsi>    | C57BL/6NTac                             | Homozygote   | M | 193 | 45  | 8  | 183 | 66  | 4  | 0.948 | 1      | 16   |
| Pthlh    | <tm1a(KOMP)Wtsi>    | C57BL/6NTac                             | Heterozygote | M | 201 | 52  | 14 | 177 | 38  | 7  | 0.881 | 0.4996 | 39.5 |
| Ptprd    | <tm2a(KOMP)Wtsi>    | C57BL/6NTac                             | Homozygote   | M | 124 | 28  | 10 | 141 | 59  | 4  | 1.137 | 0.9451 | 19   |
| Pus10    | <tm1a(EUCOMM)Hgmu>  | C57BL/6NTac                             | Homozygote   | M | 119 | 29  | 17 | 119 | 27  | 3  | 1.000 | 0.9577 | 24.5 |
| Pwp1     | <tm1a(EUCOMM)Wtsi>  | C57BL/6NTac                             | Heterozygote | M | 155 | 47  | 22 | 185 | 36  | 5  | 1.194 | 0.2355 | 35.5 |
| Pycr2    | <tm1a(EUCOMM)Wtsi>  | C57BL/6NTac                             | Homozygote   | F | 133 | 40  | 32 | 154 | 38  | 5  | 1.158 | 0.2664 | 54.5 |
| Rab15    | <tm1a(KOMP)Wtsi>    | C57BL/6NTac                             | Homozygote   | F | 203 | 30  | 15 | 183 | 22  | 3  | 0.901 | 0.342  | 14   |
| Rab17    | <tm1a(KOMP)Wtsi>    | C57BL/6NTac                             | Homozygote   | M | 109 | 42  | 18 | 107 | 34  | 4  | 0.982 | 0.8312 | 33   |
| Rab21    | <tm1b(KOMP)Wtsi>    | C57BL/6NTac                             | Heterozygote | M | 120 | 56  | 22 | 143 | 53  | 6  | 1.192 | 0.3409 | 48.5 |
| Rab5c    | <tm1a(EUCOMM)Wtsi>  | C57BL/6NTac                             | Heterozygote | M | 239 | 57  | 13 | 239 | 63  | 4  | 1.000 | 0.9545 | 25   |
| Rala     | <tm1a(EUCOMM)Wtsi>  | C57BL/6NTac                             | Heterozygote | M | 205 | 57  | 8  | 170 | 65  | 6  | 0.829 | 0.3006 | 15.5 |
| Ralgapb  | <tm1a(KOMP)Wtsi>    | C57BL/6NTac                             | Heterozygote | F | 153 | 38  | 7  | 190 | 70  | 4  | 1.242 | 0.5074 | 10   |
| Ralgs2   | <tm1a(EUCOMM)Wtsi>  | C57BL/6NTac                             | Homozygote   | F | 203 | 30  | 15 | 194 | 24  | 4  | 0.956 | 0.6146 | 24.5 |
| Raph1    | <tm1b(EUCOMM)Wtsi>  | C57BL/6NTac                             | Heterozygote | F | 144 | 46  | 18 | 121 | 32  | 5  | 0.840 | 0.4335 | 34   |
| Rasal2   | <tm1a(EUCOMM)Wtsi>  | C57BL/6NTac                             | Homozygote   | F | 260 | 52  | 18 | 52  | 33  | 3  | 0.200 | 0.0077 | 0    |
| Rasgrp4  | <tm2a(KOMP)Wtsi>    | C57BL/6NTac                             | Homozygote   | M | 204 | 43  | 11 | 233 | 32  | 3  | 1.142 | 0.3908 | 10.5 |
| Rassf1a  | <tm1.2Brd>          | C57BL/6Brd-Tyr, C57BL/6J, 129S5/SvEvBrd | Homozygote   | F | 233 | 54  | 5  | 251 | 48  | 4  | 1.077 | 0.5556 | 7    |
| Rbak     | <tm1b(KOMP)Wtsi>    | C57BL/6NTac                             | Homozygote   | M | 175 | 14  | 18 | 185 | 30  | 3  | 1.057 | 0.8404 | 24.5 |
| Rbm14    | <tm1a(KOMP)Wtsi>    | C57BL/6NTac                             | Homozygote   | M | 159 | 46  | 17 | 147 | 50  | 4  | 0.925 | 0.72   | 29.5 |
| Rbm33    | <tm1b(EUCOMM)Wtsi>  | C57BL/6NTac                             | Heterozygote | M | 121 | 38  | 16 | 143 | 53  | 6  | 1.182 | 0.3964 | 36   |
| Rbm47    | <tm1a(EUCOMM)Wtsi>  | C57BL/6NTac                             | Homozygote   | M | 218 | 60  | 15 | 144 | 51  | 5  | 0.661 | 0.0232 | 11   |
| Rbmx     | <tm2a(KOMP)Wtsi>    | C57BL/6NTac                             | Homozygote   | F | 218 | 37  | 9  | 179 | 22  | 4  | 0.821 | 0.0755 | 6    |
| Rcor2    | <tm1a(EUCOMM)Wtsi>  | C57BL/6NTac                             | Heterozygote | F | 220 | 96  | 12 | 226 | 63  | 6  | 1.027 | 1      | 35.5 |
| Reg3d    | <tm1a(EUCOMM)Wtsi>  | C57BL/6NTac                             | Homozygote   | F | 174 | 42  | 19 | 195 | 71  | 4  | 1.121 | 0.598  | 31   |
| Reg3g    | <tm1a(KOMP)Wtsi>    | C57BL/6NTac                             | Homozygote   | F | 190 | 56  | 12 | 189 | 31  | 9  | 0.995 | 1      | 53.5 |
| Repin1   | <tm1a(EUCOMM)Wtsi>  | C57BL/6NTac                             | Homozygote   | F | 206 | 55  | 17 | 156 | 17  | 4  | 0.757 | 0.0438 | 11   |
| Rftn2    | <tm1e(EUCOMM)Wtsi>  | C57BL/6NTac                             | Homozygote   | F | 281 | 51  | 12 | 347 | 49  | 5  | 1.235 | 0.0814 | 13   |

|                        |                                  |                                         |                   |          |            |           |           |            |            |          |              |               |          |
|------------------------|----------------------------------|-----------------------------------------|-------------------|----------|------------|-----------|-----------|------------|------------|----------|--------------|---------------|----------|
| <i>Rhox13</i>          | <tm1a(KOMP)Wtsi>                 | C57BL/6NTac                             | Homozygote        | F        | 213        | 58        | 12        | 272        | 87         | 5        | 1.277        | 0.1398        | 15.5     |
| <i>Rimbp2</i>          | <em1Wtsi>                        | C57BL/6NTac                             | Homozygote        | M        | 88         | 21        | 21        | 99         | 20         | 5        | 1.125        | 0.2545        | 34.5     |
| <i>Rnaseh2c</i>        | <tm1(KOMP)Wtsi>                  | C57BL/6NTac                             | Heterozygote      | F        | 142        | 39        | 11        | 148        | 48         | 5        | 1.042        | 0.734         | 24       |
| <i>Rnasek</i>          | <tm1b(EUCOMM)Wtsi>               | C57BL/6NTac                             | Heterozygote      | M        | 162        | 45        | 25        | 141        | 43         | 6        | 0.870        | 0.4531        | 59.5     |
| <b><i>Rnf10</i></b>    | <b>&lt;tm1b(KOMP)Wtsi&gt;</b>    | <b>C57BL/6NTac</b>                      | <b>Homozygote</b> | <b>M</b> | <b>141</b> | <b>36</b> | <b>23</b> | <b>497</b> | <b>94</b>  | <b>5</b> | <b>3.525</b> | <b>0.0006</b> | <b>0</b> |
| <i>Rnf125</i>          | <tm1a(EUCOMM)Wtsi>               | C57BL/6NTac                             | Homozygote        | M        | 187        | 49        | 21        | 202        | 35         | 6        | 1.080        | 0.7045        | 56       |
| <i>Rnf138</i>          | <tm1b(EUCOMM)Hmgmu>              | C57BL/6NTac                             | Homozygote        | M        | 154        | 49        | 21        | 163        | 19         | 5        | 1.058        | 0.5152        | 42       |
| <i>Rnf157</i>          | <tm1b(EUCOMM)Wtsi>               | C57BL/6NTac                             | Homozygote        | M        | 114        | 24        | 9         | 107        | 30         | 4        | 0.939        | 0.6425        | 13.5     |
| <i>Ropn1l</i>          | <tm1b(EUCOMM)Wtsi>               | C57BL/6NTac                             | Homozygote        | M        | 151        | 58        | 12        | 190        | 94         | 4        | 1.258        | 0.3617        | 16       |
| <i>Rpgrip1l</i>        | <tm1a(EUCOMM)Wtsi>               | C57BL/6NTac                             | Heterozygote      | M        | 88         | 19        | 23        | 86         | 34         | 5        | 0.977        | 0.4895        | 45.5     |
| <i>Rpia</i>            | <tm1a(KOMP)Wtsi>                 | C57BL/6NTac                             | Heterozygote      | M        | 114        | 24        | 9         | 131        | 36         | 5        | 1.149        | 0.4232        | 16       |
| <i>Rsad1</i>           | <tm1(KOMP)Vlcb>                  | C57BL/6NTac                             | Homozygote        | F        | 193        | 47        | 18        | 236        | 57         | 5        | 1.223        | 0.2315        | 28.5     |
| <i>Rspo4</i>           | <tm1a(KOMP)Wtsi>                 | C57BL/6NTac                             | Homozygote        | M        | 85         | 36        | 14        | 94         | 51         | 4        | 1.106        | 0.7497        | 24.5     |
| <i>Rufy2</i>           | <tm1a(EUCOMM)Wtsi>               | C57BL/6NTac                             | Homozygote        | M        | 266        | 53        | 13        | 293        | 11         | 3        | 1.102        | 0.2712        | 8        |
| <i>Rundc1</i>          | <tm1b(EUCOMM)Wtsi>               | C57BL/6NTac                             | Heterozygote      | M        | 196        | 57        | 15        | 138        | 41         | 6        | 0.704        | 0.0321        | 17       |
| <i>Sap130</i>          | <tm1a(KOMP)Mbp>                  | C57BL/6NTac                             | Heterozygote      | F        | 155        | 48        | 20        | 176        | 43         | 4        | 1.135        | 0.4615        | 30       |
| <i>Sc4mol</i>          | <tm1a(EUCOMM)Wtsi>               | C57BL/6NTac                             | Heterozygote      | M        | 174        | 50        | 24        | 106        | 29         | 3        | 0.609        | 0.0405        | 9        |
| <i>Scn3b</i>           | <tm1a(KOMP)Wtsi>                 | C57BL/6NTac                             | Homozygote        | M        | 183        | 51        | 15        | 271        | 111        | 5        | 1.481        | 0.0733        | 16.5     |
| <i>Sec1</i>            | <tm1a(EUCOMM)Wtsi>               | C57BL/6NTac                             | Homozygote        | M        | 174        | 57        | 22        | 210        | 46         | 3        | 1.207        | 0.2403        | 18.5     |
| <i>Sec22b</i>          | <tm1a(EUCOMM)Wtsi>               | C57BL/6NTac                             | Heterozygote      | F        | 172        | 59        | 10        | 150        | 40         | 7        | 0.872        | 0.4057        | 26       |
| <i>Sel1l</i>           | <tm1e(KOMP)Wtsi>                 | C57BL/6NTac                             | Heterozygote      | F        | 186        | 45        | 10        | 204        | 32         | 5        | 1.097        | 0.2695        | 15.5     |
| <i>Selk</i>            | <tm1b(EUCOMM)wtsi>               | C57BL/6NTac                             | Homozygote        | M        | 165        | 46        | 11        | 186        | 29         | 4        | 1.127        | 0.2387        | 12.5     |
| <i>Sema7a</i>          | <tm1Alk>                         | C57BL/6, 129S6/SvEvTac                  | Homozygote        | M        | 123        | 34        | 11        | 129        | 65         | 12       | 1.049        | 0.7817        | 61       |
| <i>Sept10</i>          | <tm1a(KOMP)Wtsi>                 | C57BL/6NTac                             | Homozygote        | M        | 260        | 80        | 17        | 266        | 122        | 4        | 1.023        | 0.9643        | 34       |
| <i>Sepw1</i>           | <tm1b(EUCOMM)Wtsi>               | C57BL/6NTac                             | Homozygote        | F        | 175        | 37        | 14        | 176        | 24         | 5        | 1.006        | 0.781         | 31.5     |
| <i>Serinc3</i>         | <tm1a(KOMP)Wtsi>                 | C57BL/6NTac                             | Homozygote        | M        | 167        | 45        | 17        | 217        | 69         | 6        | 1.299        | 0.0858        | 26       |
| <i>Serpina3c</i>       | <tm1a(KOMP)Wtsi>                 | C57BL/6NTac                             | Homozygote        | M        | 120        | 21        | 15        | 161        | 35         | 4        | 1.342        | 0.0186        | 6        |
| <i>Setd1a</i>          | <tm1b(EUCOMM)Wtsi>               | C57BL/6NTac                             | Heterozygote      | F        | 151        | 42        | 17        | 158        | 20         | 6        | 1.046        | 0.8335        | 47.5     |
| <i>Setd4</i>           | <tm1a(KOMP)Wtsi>                 | C57BL/6NTac                             | Homozygote        | F        | 218        | 37        | 9         | 200        | 27         | 5        | 0.917        | 0.4629        | 16.5     |
| <i>Setd5</i>           | <tm1a(EUCOMM)Wtsi>               | C57BL/6NTac                             | Heterozygote      | F        | 128        | 58        | 14        | 108        | 23         | 5        | 0.844        | 0.7456        | 31       |
| <i>Sfxn3</i>           | <tm1b(KOMP)Wtsi>                 | C57BL/6NTac                             | Homozygote        | M        | 113        | 42        | 17        | 118        | 66         | 4        | 1.044        | 0.9643        | 34       |
| <i>Sgms1</i>           | <tm1a(EUCOMM)Wtsi>               | C57BL/6NTac                             | Homozygote        | F        | 160        | 44        | 19        | 158        | 33         | 3        | 0.988        | 1             | 28       |
| <i>Sgol1</i>           | <tm1a(EUCOMM)Wtsi>               | C57BL/6NTac                             | Heterozygote      | M        | 178        | 66        | 16        | 164        | 19         | 5        | 0.921        | 0.3423        | 28       |
| <i>Sgsm1</i>           | <tm1b(EUCOMM)Wtsi>               | C57BL/6NTac                             | Homozygote        | M        | 175        | 42        | 18        | 186        | 56         | 5        | 1.063        | 0.6017        | 37.5     |
| <i>Sh2d5</i>           | <tm1a(EUCOMM)Wtsi>               | C57BL/6NTac                             | Homozygote        | F        | 227        | 63        | 25        | 243        | 67         | 3        | 1.070        | 0.7659        | 33       |
| <i>Sh3bgrl3</i>        | <tm2b(EUCOMM)Wtsi>               | C57BL/6NTac                             | Homozygote        | M        | 186        | 56        | 32        | 149        | 22         | 6        | 0.801        | 0.0655        | 49.5     |
| <i>Sh3bp4</i>          | <tm1a(EUCOMM)Wtsi>               | C57BL/6NTac                             | Homozygote        | F        | 152        | 49        | 19        | 128        | 20         | 4        | 0.842        | 0.1442        | 19.5     |
| <i>Sh3pxd2a</i>        | <tm1b(EUCOMM)Wtsi>               | C57BL/6NTac                             | Heterozygote      | M        | 155        | 40        | 21        | 110        | 44         | 4        | 0.710        | 0.1278        | 21       |
| <i>Sirt3</i>           | <tm1a(EUCOMM)Wtsi>               | C57BL/6NTac                             | Homozygote        | F        | 148        | 38        | 9         | 140        | 27         | 8        | 0.946        | 0.4114        | 27       |
| <i>Skida1</i>          | <tm1(KOMP)Wtsi>                  | C57BL/6NTac                             | Heterozygote      | M        | 191        | 66        | 26        | 168        | 91         | 6        | 0.880        | 0.2665        | 54.5     |
| <i>Slamf9</i>          | <tm1b(EUCOMM)Wtsi>               | C57BL/6NTac                             | Homozygote        | M        | 111        | 33        | 19        | 114        | 40         | 5        | 1.027        | 0.4552        | 36.5     |
| <i>Slc16a4</i>         | <tm2e(EUCOMM)Wtsi>               | C57BL/6NTac                             | Homozygote        | M        | 147        | 54        | 18        | 165        | 54         | 5        | 1.122        | 0.5762        | 37       |
| <i>Slc16a6</i>         | <tm1a(EUCOMM)Wtsi>               | C57BL/6NTac                             | Homozygote        | F        | 229        | 57        | 16        | 225        | 77         | 6        | 0.983        | 0.6312        | 41       |
| <i>Slc1a4</i>          | <tm1e(EUCOMM)Wtsi>               | C57BL/6NTac                             | Homozygote        | F        | 222        | 55        | 13        | 220        | 22         | 6        | 0.991        | 0.8603        | 36.5     |
| <i>Slc20a2</i>         | <tm1a(EUCOMM)Wtsi>               | C57BL/6NTac                             | Homozygote        | M        | 142        | 39        | 13        | 142        | 59         | 4        | 1.000        | 0.865         | 24       |
| <i>Slc25a20</i>        | <tm1a(EUCOMM)Wtsi>               | C57BL/6NTac                             | Heterozygote      | F        | 144        | 40        | 20        | 131        | 29         | 7        | 0.910        | 0.5063        | 57.5     |
| <i>Slc25a28</i>        | <tm1b(EUCOMM)Wtsi>               | C57BL/6NTac                             | Homozygote        | F        | 237        | 58        | 14        | 265        | 24         | 4        | 1.118        | 0.428         | 20       |
| <i>Slc25a30</i>        | <tm1a(EUCOMM)Wtsi>               | C57BL/6NTac                             | Homozygote        | F        | 192        | 45        | 19        | 134        | 52         | 3        | 0.698        | 0.0618        | 8.5      |
| <i>Slc38a2</i>         | <tm1a(KOMP)Wtsi>                 | C57BL/6NTac                             | Heterozygote      | F        | 138        | 37        | 12        | 141        | 49         | 4        | 1.022        | 1             | 23.5     |
| <i>Slc5a7</i>          | <tm1a(KOMP)Wtsi>                 | C57BL/6NTac                             | Heterozygote      | M        | 178        | 66        | 16        | 144        | 48         | 8        | 0.809        | 0.1252        | 38.5     |
| <b><i>Slc9a3r2</i></b> | <b>&lt;tm2a(EUCOMM)Hmgmu&gt;</b> | <b>C57BL/6NTac</b>                      | <b>Homozygote</b> | <b>M</b> | <b>97</b>  | <b>34</b> | <b>24</b> | <b>291</b> | <b>107</b> | <b>5</b> | <b>3.000</b> | <b>0.0035</b> | <b>9</b> |
| <i>Sliitrk4</i>        | <tm1b(KOMP)Wtsi>                 | C57BL/6NTac                             | Homozygote        | F        | 156        | 46        | 18        | 155        | 58         | 7        | 0.994        | 0.9758        | 62       |
| <i>Slu7</i>            | <tm1a(KOMP)Wtsi>                 | C57BL/6NTac                             | Heterozygote      | M        | 85         | 36        | 14        | 66         | 24         | 7        | 0.776        | 0.2472        | 33       |
| <i>Slx4ip</i>          | <tm1a(EUCOMM)Wtsi>               | C57BL/6NTac                             | Homozygote        | F        | 239        | 57        | 16        | 230        | 28         | 7        | 0.962        | 0.5929        | 47.5     |
| <i>Smg1</i>            | <tm1b(EUCOMM)Hgmua>              | C57BL/6NTac                             | Heterozygote      | M        | 111        | 30        | 24        | 92         | 37         | 5        | 0.829        | 0.248         | 39.5     |
| <i>Smpd4</i>           | <tm2b(KOMP)Wtsi>                 | C57BL/6NTac                             | Homozygote        | F        | 52         | 36        | 3         | 47         | 14         | 3        | 0.904        | 1             | 4        |
| <i>Sms</i>             | <tm1a(EUCOMM)Wtsi>               | C57BL/6Brd-Tyr, C57BL/6Dnk, C57BL/6NTac | Heterozygote      | F        | 216        | 80        | 12        | 264        | 80         | 8        | 1.222        | 0.2799        | 33.5     |

|                 |                               |                                                |                   |          |            |           |           |           |           |          |              |               |           |
|-----------------|-------------------------------|------------------------------------------------|-------------------|----------|------------|-----------|-----------|-----------|-----------|----------|--------------|---------------|-----------|
| Smyd5           | <tm1a(EUCOMM)Wtsi>            | C57BL/6NTac                                    | Homozygote        | M        | 174        | 50        | 24        | 86        | 49        | 5        | 0.494        | 0.0094        | 8         |
| Snx31           | <tm1a(KOMP)Wtsi>              | C57BL/6NTac                                    | Homozygote        | M        | 240        | 51        | 15        | 218       | 64        | 5        | 0.908        | 0.2947        | 25        |
| Snx8            | <tm2a(EUCOMM)Hmgu>            | C57BL/6NTac                                    | Homozygote        | F        | 209        | 34        | 21        | 255       | 26        | 5        | 1.220        | 0.019         | 16        |
| Spata25         | <tm1a(KOMP)Wtsi>              | C57BL/6NTac                                    | Homozygote        | F        | 142        | 48        | 16        | 163       | 36        | 5        | 1.148        | 0.4328        | 30        |
| Spink10         | <tm1a(KOMP)Wtsi>              | C57BL/6NTac                                    | Homozygote        | F        | 197        | 67        | 12        | 137       | 32        | 5        | 0.695        | 0.0651        | 12        |
| Spink14         | <tm1e(KOMP)Wtsi>              | C57BL/6NTac                                    | Homozygote        | F        | 352        | 93        | 20        | 350       | 41        | 4        | 0.994        | 0.9382        | 38.5      |
| Spnb2           | <tm1a(EUCOMM)Wtsi>            | C57BL/6Brd-Tyr, C57BL/6NTac                    | Heterozygote      | F        | 137        | 46        | 8         | 146       | 41        | 7        | 1.066        | 0.7719        | 25        |
| <b>Spns2</b>    | <b>&lt;tm1a(KOMP)Wtsi&gt;</b> | <b>C57BL/6Brd-Tyr, C57BL/6Dnk, C57BL/6NTac</b> | <b>Homozygote</b> | <b>M</b> | <b>231</b> | <b>76</b> | <b>8</b>  | <b>29</b> | <b>20</b> | <b>5</b> | <b>0.126</b> | <b>0.0016</b> | <b>0</b>  |
| Spopl           | <tm1a(EUCOMM)Wtsi>            | C57BL/6NTac                                    | Homozygote        | M        | 181        | 35        | 15        | 183       | 21        | 3        | 1.011        | 0.812         | 20        |
| Sqle            | <tm1a(EUCOMM)Wtsi>            | C57BL/6NTac                                    | Heterozygote      | M        | 249        | 35        | 14        | 208       | 47        | 4        | 0.835        | 0.111         | 12.5      |
| Srrm4           | <tm1e(KOMP)Wtsi>              | C57BL/6NTac                                    | Heterozygote      | M        | 165        | 46        | 11        | 163       | 48        | 9        | 0.988        | 0.7609        | 45        |
| Srsf7           | <tm1a(EUCOMM)Wtsi>            | C57BL/6NTac                                    | Heterozygote      | F        | 213        | 54        | 14        | 236       | 8         | 4        | 1.108        | 0.1517        | 14        |
| Ssbp1           | <tm1a(KOMP)Wtsi>              | C57BL/6NTac                                    | Heterozygote      | F        | 319        | 77        | 18        | 292       | 52        | 6        | 0.915        | 0.3678        | 40        |
| Ssr2            | <tm1b(EUCOMM)Wtsi>            | C57BL/6NTac                                    | Heterozygote      | M        | 127        | 25        | 30        | 131       | 25        | 7        | 1.031        | 0.461         | 85.5      |
| Stard8          | <tm1b(EUCOMM)Wtsi>            | C57BL/6NTac                                    | Homozygote        | F        | 196        | 56        | 20        | 209       | 29        | 7        | 1.066        | 0.524         | 58        |
| Stau2           | <tm1a(EUCOMM)Wtsi>            | C57BL/6NTac                                    | Homozygote        | M        | 80         | 21        | 21        | 101       | 23        | 5        | 1.263        | 0.1032        | 27        |
| Stxbp4          | <tm1a(EUCOMM)Wtsi>            | C57BL/6NTac                                    | Homozygote        | F        | 167        | 36        | 15        | 123       | 50        | 4        | 0.737        | 0.1766        | 16        |
| Sult1c1         | <tm1b(KOMP)Wtsi>              | C57BL/6NTac                                    | Homozygote        | F        | 123        | 35        | 20        | 136       | 19        | 4        | 1.106        | 0.642         | 33.5      |
| Supt3           | <tm1a(EUCOMM)HgmU>            | C57BL/6NTac                                    | Heterozygote      | M        | 141        | 36        | 23        | 127       | 25        | 5        | 0.901        | 0.548         | 47        |
| Supt5           | <tm2a(KOMP)Wtsi>              | C57BL/6NTac                                    | Heterozygote      | M        | 128        | 28        | 14        | 135       | 47        | 5        | 1.055        | 0.817         | 32        |
| Syt1            | <tm1a(EUCOMM)Wtsi>            | C57BL/6NTac                                    | Heterozygote      | F        | 229        | 57        | 16        | 202       | 66        | 5        | 0.882        | 0.2634        | 26        |
| Taf11           | <tm1a(EUCOMM)Wtsi>            | C57BL/6NTac                                    | Heterozygote      | M        | 69         | 17        | 10        | 75        | 33        | 5        | 1.087        | 0.7131        | 21.5      |
| Tatdn3          | <tm1a(EUCOMM)Wtsi>            | C57BL/6NTac                                    | Homozygote        | F        | 198        | 41        | 12        | 212       | 41        | 5        | 1.071        | 0.5599        | 24        |
| <b>Tbcd122a</b> | <b>&lt;tm1b(KOMP)Wtsi&gt;</b> | <b>C57BL/6NTac</b>                             | <b>Homozygote</b> | <b>M</b> | <b>83</b>  | <b>29</b> | <b>26</b> | <b>42</b> | <b>25</b> | <b>7</b> | <b>0.506</b> | <b>0.0051</b> | <b>27</b> |
| Tceal5          | <tm1a(KOMP)Wtsi>              | C57BL/6NTac                                    | Homozygote        | M        | 171        | 45        | 12        | 190       | 40        | 6        | 1.111        | 0.3726        | 26        |
| Tcf4            | <tm1a(EUCOMM)Wtsi>            | C57BL/6NTac                                    | Heterozygote      | M        | 203        | 38        | 16        | 176       | 42        | 5        | 0.867        | 0.1999        | 24        |
| Tcf7l2          | <tm1a(EUCOMM)Wtsi>            | C57BL/6NTac                                    | Heterozygote      | F        | 203        | 30        | 15        | 202       | 55        | 4        | 0.995        | 0.6165        | 24.5      |
| Tchp            | <tm1a(EUCOMM)Wtsi>            | C57BL/6NTac                                    | Homozygote        | M        | 240        | 51        | 15        | 250       | 28        | 3        | 1.042        | 0.7669        | 19.5      |
| Tcp11           | <tm1a(EUCOMM)Wtsi>            | C57BL/6NTac                                    | Homozygote        | F        | 155        | 48        | 20        | 150       | 50        | 4        | 0.968        | 0.8768        | 37.5      |
| Tcte1           | <tm1a(KOMP)Wtsi>              | C57BL/6NTac                                    | Homozygote        | M        | 165        | 46        | 11        | 145       | 17        | 6        | 0.879        | 0.5131        | 26        |
| Tctex1d2        | <tm1e(EUCOMM)Wtsi>            | C57BL/6NTac                                    | Homozygote        | M        | 249        | 35        | 14        | 241       | 33        | 6        | 0.968        | 0.8689        | 39.5      |
| Tead3           | <tm1a(EUCOMM)Wtsi>            | C57BL/6NTac                                    | Homozygote        | F        | 274        | 96        | 20        | 263       | 50        | 6        | 0.960        | 0.345         | 44        |
| Tet1            | <tm1a(KOMP)Wtsi>              | C57BL/6NTac                                    | Heterozygote      | F        | 170        | 34        | 19        | 160       | 33        | 6        | 0.941        | 0.5452        | 47        |
| Tex38           | <tm1a(KOMP)Wtsi>              | C57BL/6NTac                                    | Homozygote        | F        | 138        | 38        | 24        | 154       | 19        | 5        | 1.116        | 0.5444        | 49        |
| Tff1            | <tm1a(EUCOMM)Wtsi>            | C57BL/6NTac                                    | Homozygote        | M        | 159        | 55        | 28        | 150       | 21        | 3        | 0.943        | 0.6639        | 35        |
| Tgfb1i1         | <tm1b(KOMP)Wtsi>              | C57BL/6NTac                                    | Homozygote        | F        | 191        | 67        | 20        | 180       | 62        | 5        | 0.942        | 0.6101        | 42        |
| Tgm6            | <tm1a(KOMP)Wtsi>              | C57BL/6NTac                                    | Homozygote        | F        | 128        | 28        | 14        | 55        | 41        | 4        | 0.430        | 0.0126        | 4         |
| Tigar           | <tm1b(EUCOMM)Wtsi>            | C57BL/6NTac                                    | Homozygote        | M        | 155        | 43        | 27        | 136       | 31        | 7        | 0.877        | 0.2329        | 66        |
| Timeless        | <tm1b(EUCOMM)Hmgu>            | C57BL/6NTac                                    | Heterozygote      | M        | 121        | 38        | 16        | 152       | 11        | 4        | 1.256        | 0.0375        | 9.5       |
| Timmdc1         | <tm1b(EUCOMM)Wtsi>            | C57BL/6NTac                                    | Heterozygote      | M        | 109        | 42        | 18        | 129       | 29        | 6        | 1.183        | 0.182         | 33.5      |
| Tmc3            | <tm2b(KOMP)Wtsi>              | C57BL/6NTac                                    | Homozygote        | F        | 160        | 44        | 19        | 130       | 40        | 3        | 0.813        | 0.2921        | 17        |
| Tmem110         | <tm2b(KOMP)Wtsi>              | C57BL/6NTac                                    | Homozygote        | F        | 155        | 38        | 13        | 154       | 36        | 4        | 0.994        | 0.8437        | 30        |
| Tmem126a        | <tm1a(EUCOMM)Wtsi>            | C57BL/6NTac                                    | Homozygote        | F        | 164        | 47        | 18        | 149       | 57        | 3        | 0.909        | 0.8061        | 24        |
| Tmem127         | <tm1(KOMP)Wtsi>               | C57BL/6NTac                                    | Homozygote        | F        | 201        | 52        | 24        | 206       | 29        | 5        | 1.025        | 0.6025        | 50.5      |
| Tmem178b        | <tm1a(KOMP)Wtsi>              | C57BL/6NTac                                    | Homozygote        | M        | 143        | 49        | 28        | 127       | 28        | 4        | 0.888        | 0.6484        | 47.5      |
| Tmem18          | <tm1b(EUCOMM)Wtsi>            | C57BL/6NTac                                    | Homozygote        | M        | 104        | 39        | 21        | 93        | 68        | 3        | 0.894        | 0.5411        | 24        |
| Tmem241         | <tm1b(EUCOMM)Wtsi>            | C57BL/6NTac                                    | Homozygote        | M        | 111        | 34        | 19        | 101       | 20        | 6        | 0.910        | 0.4642        | 45        |
| Tmem254b        | <tm1a(KOMP)Wtsi>              | C57BL/6NTac                                    | Homozygote        | F        | 200        | 47        | 16        | 240       | 26        | 3        | 1.200        | 0.1288        | 10        |
| Tmem30a         | <tm1a(KOMP)Wtsi>              | C57BL/6NTac                                    | Heterozygote      | M        | 151        | 64        | 20        | 204       | 44        | 5        | 1.351        | 0.0829        | 24        |
| Tmem37          | <tm1a(EUCOMM)Wtsi>            | C57BL/6NTac                                    | Homozygote        | M        | 159        | 55        | 28        | 130       | 22        | 4        | 0.818        | 0.1996        | 33        |
| Tmem42          | <tm1b(KOMP)Wtsi>              | C57BL/6NTac                                    | Homozygote        | F        | 138        | 45        | 19        | 152       | 22        | 3        | 1.101        | 0.9238        | 27        |
| Tnik            | <tm3a(EUCOMM)Wtsi>            | C57BL/6NTac                                    | Homozygote        | M        | 230        | 29        | 10        | 213       | 91        | 3        | 0.926        | 0.5536        | 11        |
| Tomm20l         | <tm1a(EUCOMM)Wtsi>            | C57BL/6NTac                                    | Homozygote        | F        | 147        | 30        | 12        | 183       | 44        | 9        | 1.245        | 0.0949        | 30        |
| Traf2           | <tm1a(EUCOMM)Wtsi>            | C57BL/6NTac                                    | Heterozygote      | F        | 249        | 43        | 23        | 267       | 27        | 5        | 1.072        | 0.5077        | 46        |
| Traf6           | <tm2a(EUCOMM)Wtsi>            | C57BL/6NTac                                    | Heterozygote      | F        | 115        | 31        | 12        | 143       | 42        | 4        | 1.243        | 0.3316        | 15.5      |
| Tram2           | <tm1a(KOMP)Wtsi>              | C57BL/6NTac                                    | Heterozygote      | M        | 178        | 66        | 16        | 158       | 62        | 5        | 0.888        | 0.4082        | 29.5      |
| Trappc10        | <tm1b(KOMP)Wtsi>              | C57BL/6NTac                                    | Homozygote        | F        | 185        | 35        | 25        | 191       | 35        | 4        | 1.032        | 0.8743        | 47        |

|         |                    |                                         |              |   |     |     |    |     |    |    |       |          |      |
|---------|--------------------|-----------------------------------------|--------------|---|-----|-----|----|-----|----|----|-------|----------|------|
| Trappc9 | <tm1a(EUCOMM)Wtsi> | C57BL/6NTac                             | Homozygote   | M | 152 | 57  | 24 | 163 | 40 | 5  | 1.072 | 0.931058 | 83   |
| Trem1   | <tm1(KOMP)Vlcg>    | C57BL/6NTac                             | Homozygote   | F | 300 | 83  | 17 | 211 | 52 | 7  | 0.703 | 0.0172   | 21.5 |
| Trex1   | <tm1a(KOMP)Wtsi>   | C57BL/6NTac                             | Homozygote   | M | 234 | 106 | 17 | 210 | 52 | 3  | 0.897 | 0.6714   | 21   |
| Trim17  | <tm1e(EUCOMM)Wtsi> | C57BL/6NTac                             | Homozygote   | F | 148 | 38  | 9  | 146 | 38 | 5  | 0.986 | 1        | 22   |
| Trim21  | <em1Wtsi>          | C57BL/6NTac                             | Homozygote   | M | 154 | 49  | 21 | 181 | 10 | 4  | 1.175 | 0.0494   | 15   |
| Trim25  | <tm2a(EUCOMM)Hmgu> | C57BL/6NTac                             | Homozygote   | M | 159 | 55  | 28 | 133 | 27 | 5  | 0.836 | 0.2581   | 47   |
| Trim29  | <tm1b(EUCOMM)Wtsi> | C57BL/6NTac                             | Homozygote   | F | 193 | 47  | 18 | 200 | 46 | 3  | 1.036 | 1        | 26.5 |
| Trim38  | <tm1a(EUCOMM)Hmgu> | C57BL/6NTac                             | Homozygote   | M | 119 | 43  | 26 | 109 | 60 | 5  | 0.916 | 0.6479   | 56   |
| Trim45  | <tm1a(KOMP)Wtsi>   | C57BL/6Brd-Tyr, C57BL/6Dnk, C57BL/6NTac | Heterozygote | M | 121 | 38  | 16 | 120 | 46 | 8  | 0.992 | 0.8302   | 60   |
| Trim56  | <tm1a(EUCOMM)Wtsi> | C57BL/6NTac                             | Homozygote   | M | 137 | 44  | 18 | 182 | 43 | 4  | 1.328 | 0.0807   | 15   |
| Trim65  | <tm1b(KOMP)Wtsi>   | C57BL/6NTac                             | Homozygote   | M | 155 | 40  | 21 | 160 | 60 | 7  | 1.032 | 0.9576   | 72   |
| Trmt2a  | <tm2b(EUCOMM)Wtsi> | C57BL/6NTac                             | Homozygote   | F | 174 | 42  | 19 | 212 | 44 | 5  | 1.218 | 0.088    | 23   |
| Trp53rk | <tm1a(EUCOMM)Wtsi> | C57BL/6NTac                             | Homozygote   | M | 294 | 51  | 10 | 259 | 30 | 5  | 0.881 | 0.2186   | 14.5 |
| Trub2   | <tm2a(EUCOMM)Wtsi> | C57BL/6NTac                             | Heterozygote | M | 112 | 34  | 10 | 114 | 25 | 4  | 1.018 | 0.9451   | 19   |
| Tsfm    | <tm1a(EUCOMM)Wtsi> | C57BL/6NTac                             | Heterozygote | M | 120 | 21  | 15 | 145 | 40 | 3  | 1.208 | 0.3425   | 14   |
| Ttll11  | <tm1a(EUCOMM)Wtsi> | C57BL/6NTac                             | Homozygote   | F | 298 | 78  | 12 | 274 | 70 | 10 | 0.919 | 0.3219   | 44.5 |
| Tuba3a  | <tm1b(KOMP)Wtsi>   | C57BL/6NTac                             | Homozygote   | M | 151 | 64  | 20 | 165 | 30 | 6  | 1.093 | 0.7378   | 54   |
| Tuft1   | <tm1a(KOMP)Wtsi>   | C57BL/6NTac                             | Homozygote   | F | 239 | 57  | 16 | 134 | 31 | 5  | 0.561 | 0.0026   | 3    |
| Ubash3a | <tm1a(KOMP)Wtsi>   | C57BL/6NTac                             | Homozygote   | F | 128 | 58  | 14 | 136 | 67 | 4  | 1.063 | 0.71     | 24   |
| Ube2d1  | <tm3e(EUCOMM)Wtsi> | C57BL/6NTac                             | Homozygote   | M | 95  | 30  | 18 | 80  | 27 | 5  | 0.842 | 0.3142   | 31   |
| Ubxn10  | <tm1b(EUCOMM)Wtsi> | C57BL/6NTac                             | Homozygote   | M | 116 | 26  | 21 | 113 | 28 | 7  | 0.974 | 0.7704   | 67.5 |
| Uevld   | <tm1a(EUCOMM)Wtsi> | C57BL/6NTac                             | Homozygote   | M | 123 | 65  | 9  | 130 | 50 | 4  | 1.057 | 0.8252   | 16   |
| Umodl1  | <tm1a(KOMP)Wtsi>   | C57BL/6NTac                             | Homozygote   | F | 171 | 33  | 7  | 149 | 24 | 5  | 0.871 | 0.1021   | 24   |
| Unk     | <tm1a(KOMP)Wtsi>   | C57BL/6NTac                             | Heterozygote | M | 88  | 19  | 23 | 92  | 8  | 7  | 1.045 | 0.2691   | 57.5 |
| Upb1    | <tm1a(EUCOMM)Wtsi> | C57BL/6NTac                             | Homozygote   | F | 185 | 35  | 25 | 192 | 63 | 4  | 1.038 | 0.5066   | 39   |
| Uri1    | <tm1a(EUCOMM)Wtsi> | C57BL/6NTac                             | Homozygote   | M | 196 | 57  | 15 | 112 | 3  | 3  | 0.571 | 0.0091   | 0    |
| Ush1c   | <tm1a(KOMP)Wtsi>   | C57BL/6NTac                             | Homozygote   | F | 139 | 41  | 18 | 191 | 99 | 5  | 1.374 | 0.232    | 28.5 |
| Ushbp1  | <tm1a(EUCOMM)Wtsi> | C57BL/6NTac                             | Homozygote   | M | 151 | 58  | 12 | 129 | 37 | 4  | 0.854 | 0.6687   | 20   |
| Usp11   | <tm1(KOMP)Wtsi>    | C57BL/6NTac                             | Homozygote   | M | 120 | 21  | 15 | 135 | 24 | 5  | 1.125 | 0.4063   | 27.5 |
| Usp20   | <tm1a(EUCOMM)Hmgu> | C57BL/6NTac                             | Homozygote   | F | 249 | 53  | 18 | 267 | 61 | 5  | 1.072 | 0.6279   | 38   |
| Usp21   | <tm1a(EUCOMM)Wtsi> | C57BL/6NTac                             | Homozygote   | F | 172 | 32  | 12 | 143 | 24 | 5  | 0.831 | 0.0716   | 12.5 |
| Usp22   | <tm1a(KOMP)Wtsi>   | C57BL/6NTac                             | Heterozygote | F | 201 | 52  | 24 | 233 | 8  | 6  | 1.159 | 0.091    | 39   |
| Usp24   | <tm1a(KOMP)Wtsi>   | C57BL/6NTac                             | Homozygote   | M | 211 | 63  | 12 | 272 | 15 | 6  | 1.289 | 0.0192   | 10.5 |
| Usp3    | <tm1a(EUCOMM)Wtsi> | C57BL/6NTac                             | Heterozygote | F | 233 | 58  | 17 | 261 | 42 | 6  | 1.120 | 0.02918  | 35.5 |
| Usp30   | <tm2a(EUCOMM)Hmgu> | C57BL/6NTac                             | Homozygote   | M | 105 | 30  | 15 | 93  | 30 | 7  | 0.886 | 0.6204   | 45   |
| Usp37   | <em1Wtsi>          | C57BL/6NTac                             | Heterozygote | F | 150 | 43  | 21 | 181 | 46 | 5  | 1.207 | 0.1718   | 31   |
| Usp4    | <tm1b(EUCOMM)Wtsi> | C57BL/6NTac                             | Homozygote   | M | 105 | 30  | 15 | 104 | 18 | 3  | 0.990 | 1        | 22   |
| Usp44   | <tm1b(EUCOMM)Hmgu> | C57BL/6NTac                             | Homozygote   | M | 138 | 29  | 20 | 136 | 36 | 5  | 0.986 | 0.7597   | 45   |
| Usp5    | <tm1a(EUCOMM)Hmgu> | C57BL/6NTac                             | Heterozygote | M | 162 | 49  | 20 | 118 | 41 | 6  | 0.728 | 0.0634   | 29   |
| Vamp3   | <tm2a(EUCOMM)Wtsi> | C57BL/6NTac                             | Homozygote   | M | 170 | 50  | 22 | 240 | 90 | 4  | 1.412 | 0.1767   | 24.5 |
| Vps13a  | <tm1b(EUCOMM)Wtsi> | C57BL/6NTac                             | Homozygote   | F | 133 | 40  | 32 | 128 | 25 | 4  | 0.962 | 0.6869   | 55.5 |
| Vps33b  | <tm1a(EUCOMM)Wtsi> | C57BL/6NTac                             | Heterozygote | M | 294 | 51  | 10 | 315 | 49 | 6  | 1.071 | 0.5502   | 24   |
| Vps51   | <tm1a(KOMP)Wtsi>   | C57BL/6NTac                             | Heterozygote | F | 218 | 37  | 9  | 215 | 43 | 5  | 0.986 | 0.7893   | 20   |
| Vps53   | <tm1a(KOMP)Wtsi>   | C57BL/6NTac                             | Heterozygote | F | 220 | 96  | 12 | 246 | 54 | 7  | 1.118 | 0.6724   | 36.5 |
| Vps72   | <tm1a(EUCOMM)Wtsi> | C57BL/6NTac                             | Heterozygote | F | 173 | 49  | 13 | 223 | 73 | 4  | 1.289 | 0.3355   | 17   |
| Vwa3a   | <tm1b(KOMP)Wtsi>   | C57BL/6NTac                             | Homozygote   | M | 155 | 40  | 21 | 131 | 54 | 6  | 0.845 | 0.3491   | 46.5 |
| Wac     | <tm1b(KOMP)Wtsi>   | C57BL/6NTac                             | Heterozygote | M | 79  | 29  | 21 | 75  | 16 | 7  | 0.950 | 0.5241   | 61   |
| Wbp5    | <tm1a(KOMP)Wtsi>   | C57BL/6NTac                             | Homozygote   | M | 181 | 35  | 15 | 183 | 26 | 5  | 1.011 | 0.9303   | 36   |
| Wdr89   | <tm1a(KOMP)Wtsi>   | C57BL/6NTac                             | Homozygote   | F | 130 | 37  | 25 | 179 | 32 | 4  | 1.377 | 0.0209   | 13   |
| Wdtdc1  | <tm1a(KOMP)Wtsi>   | C57BL/6NTac                             | Homozygote   | M | 153 | 51  | 19 | 180 | 47 | 4  | 1.176 | 0.2553   | 23.5 |
| Wfikkn2 | <tm1b(EUCOMM)Wtsi> | C57BL/6NTac                             | Homozygote   | F | 242 | 60  | 19 | 273 | 45 | 5  | 1.128 | 0.2705   | 31.5 |
| Wnt16   | <tm2b(EUCOMM)Wtsi> | C57BL/6NTac                             | Heterozygote | F | 242 | 60  | 19 | 202 | 58 | 4  | 0.835 | 0.256    | 23.5 |
| Wnt3    | <tm2a(EUCOMM)Wtsi> | C57BL/6NTac                             | Heterozygote | F | 227 | 63  | 25 | 211 | 60 | 8  | 0.930 | 0.5411   | 85   |
| Wrap53  | <tm1b(EUCOMM)Wtsi> | C57BL/6NTac                             | Heterozygote | M | 175 | 14  | 18 | 143 | 33 | 5  | 0.817 | 0.1455   | 25   |
| Xkrx    | <tm1b(EUCOMM)Wtsi> | C57BL/6NTac                             | Homozygote   | M | 121 | 34  | 15 | 118 | 31 | 5  | 0.975 | 0.7933   | 34   |
| Xpnpep1 | <tm1a(KOMP)Wtsi>   | C57BL/6NTac                             | Heterozygote | M | 183 | 51  | 15 | 201 | 63 | 9  | 1.098 | 0.6328   | 59   |
| Xxylt1  | <tm1a(EUCOMM)Hmgu> | C57BL/6NTac                             | Homozygote   | F | 261 | 47  | 21 | 262 | 87 | 5  | 1.004 | 0.8191   | 48.5 |

|         |                    |             |              |   |     |    |    |     |     |   |       |        |      |
|---------|--------------------|-------------|--------------|---|-----|----|----|-----|-----|---|-------|--------|------|
| Ydjc    | <tm1(KOMP)Wtsi>    | C57BL/6NTac | Homozygote   | F | 185 | 73 | 17 | 133 | 66  | 4 | 0.719 | 0.1379 | 17   |
| Yipf7   | <tm1e(KOMP)Wtsi>   | C57BL/6NTac | Homozygote   | M | 118 | 38 | 18 | 144 | 38  | 5 | 1.220 | 0.1919 | 27   |
| Ypel4   | <tm1a(EUCOMM)Wtsi> | C57BL/6NTac | Homozygote   | F | 242 | 60 | 19 | 255 | 93  | 6 | 1.054 | 0.2793 | 39.5 |
| Zbed5   | <tm1b(EUCOMM)Wtsi> | C57BL/6NTac | Homozygote   | M | 127 | 25 | 30 | 111 | 32  | 3 | 0.874 | 0.5105 | 34   |
| Zc3h14  | <tm1a(KOMP)Wtsi>   | C57BL/6NTac | Homozygote   | M | 93  | 40 | 17 | 112 | 7   | 5 | 1.204 | 0.1827 | 25   |
| Zcchc14 | <tm1a(KOMP)Wtsi>   | C57BL/6NTac | Heterozygote | F | 200 | 54 | 13 | 204 | 109 | 6 | 1.020 | 0.5003 | 36.5 |
| Zfp182  | <tm1b(KOMP)Wtsi>   | C57BL/6NTac | Homozygote   | F | 191 | 67 | 20 | 193 | 40  | 5 | 1.010 | 0.8116 | 46   |
| Zfp239  | <tm1b(KOMP)Wtsi>   | C57BL/6NTac | Homozygote   | M | 110 | 45 | 20 | 135 | 37  | 5 | 1.227 | 0.2344 | 32   |
| Zfp266  | <tm1b(EUCOMM)Wtsi> | C57BL/6NTac | Heterozygote | M | 103 | 37 | 20 | 100 | 26  | 9 | 0.971 | 0.9062 | 87   |
| Zfp287  | <tm1b(EUCOMM)Wtsi> | C57BL/6NTac | Homozygote   | F | 138 | 37 | 12 | 164 | 19  | 4 | 1.188 | 0.145  | 11.5 |
| Zfp341  | <tm1a(KOMP)Wtsi>   | C57BL/6NTac | Homozygote   | M | 109 | 24 | 20 | 107 | 32  | 5 | 0.982 | 0.7857 | 45.4 |
| Zfp365  | <tm1a(KOMP)Wtsi>   | C57BL/6NTac | Homozygote   | F | 174 | 42 | 19 | 141 | 43  | 4 | 0.810 | 0.2235 | 22.5 |
| Zfp408  | <tm1b(EUCOMM)Wtsi> | C57BL/6NTac | Homozygote   | M | 104 | 39 | 21 | 99  | 9   | 3 | 0.952 | 0.9304 | 30   |
| Zfp616  | <tm1b(KOMP)Wtsi>   | C57BL/6NTac | Homozygote   | M | 122 | 36 | 13 | 159 | 17  | 4 | 1.303 | 0.1125 | 11.5 |
| Zfp658  | <tm1b(EUCOMM)Wtsi> | C57BL/6NTac | Homozygote   | F | 158 | 49 | 18 | 170 | 51  | 6 | 1.076 | 0.5709 | 45   |
| Zfp719  | <tm1a(EUCOMM)Wtsi> | C57BL/6NTac | Homozygote   | F | 220 | 96 | 12 | 230 | 79  | 7 | 1.045 | 0.8657 | 39.5 |
| Zfp763  | <em1Wtsi>          | C57BL/6NTac | Homozygote   | M | 203 | 60 | 20 | 225 | 7   | 4 | 1.108 | 0.4384 | 29.5 |
| Zfp791  | <tm1a(KOMP)Wtsi>   | C57BL/6NTac | Homozygote   | M | 196 | 57 | 15 | 184 | 99  | 4 | 0.939 | 0.7258 | 26   |
| Zfp84   | <tm1b(KOMP)Wtsi>   | C57BL/6NTac | Homozygote   | M | 119 | 43 | 26 | 141 | 46  | 4 | 1.185 | 0.3601 | 36.5 |
| Zfp879  | <tm2b(KOMP)Wtsi>   | C57BL/6NTac | Homozygote   | M | 87  | 40 | 24 | 42  | 30  | 5 | 0.483 | 0.0225 | 20   |
| Zfyve20 | <tm1a(EUCOMM)Wtsi> | C57BL/6NTac | Heterozygote | F | 133 | 37 | 10 | 136 | 26  | 5 | 1.023 | 0.7588 | 22   |
| Zfyve28 | <tm1b(EUCOMM)Wtsi> | C57BL/6NTac | Homozygote   | F | 175 | 42 | 18 | 102 | 6   | 4 | 0.583 | 0.0038 | 1.5  |
| Zkscan1 | <tm1b(EUCOMM)Wtsi> | C57BL/6NTac | Heterozygote | M | 227 | 36 | 13 | 222 | 61  | 8 | 0.978 | 0.772  | 47.5 |
| Zranb1  | <tm1a(EUCOMM)Hmgu> | C57BL/6NTac | Homozygote   | F | 259 | 46 | 13 | 203 | 71  | 8 | 0.784 | 0.0581 | 25.5 |
| Zscan2  | <tm1a(KOMP)Wtsi>   | C57BL/6NTac | Homozygote   | F | 142 | 39 | 11 | 195 | 49  | 8 | 1.373 | 0.0474 | 19.5 |



**SI Table 2. Results of the Integrative Data Analysis (IDA).** IDA was performed on experimental metastasis assay data from mutant mouse lines tested in  $\geq 2$  independent cohorts. Shown in the top box are mutant lines that were significant from stage 1 of the screen (39/810, 5%), and were found to be significant by IDA ( $P < 0.01$ ; 23/39, 59%); termed "hit". Green indicates mice with an increased metastatic burden and red indicates mice with a decreased metastatic burden (the magnitude of the burden is indicated by the "genotype effect"). The genes are listed in order of "genotype effect". Shown in the middle box (in blue) are mutant lines that were significant from stage 1 of the screen, and were not found to be significant by IDA ( $P > 0.01$ ; 16/39, 41%); termed "false positive". Shown in the bottom box (in black) are mutant lines which were not significant from stage 1 of the screen (102/810, 12%) for which additional cohorts were tested to ensure the selection criteria from stage 1 was not too stringent; termed "repeated negative". F, female; M, male; SE, standard error.

| Gene                 | No. cohorts | Genders | Genotype estimate | SE | Adjusted P value | Classification   |
|----------------------|-------------|---------|-------------------|----|------------------|------------------|
| <i>Irf1</i>          | 4           | 1M, 3F  | 236               | 27 | 1.170E-06        | "hit"            |
| <i>Rnf10</i>         | 5           | 2M, 3F  | 217               | 16 | 0.000E+00        | "hit"            |
| <i>Pik3cg</i>        | 6           | 4M, 2F  | 196               | 14 | 1.284E-12        | "hit"            |
| <i>Dph6</i>          | 4           | 2M, 2F  | 194               | 23 | 4.677E-05        | "hit"            |
| <i>Slc9a3r2</i>      | 6           | 5M, 1F  | 137               | 21 | 3.026E-05        | "hit"            |
| <i>Ighm</i>          | 6           | 4M, 2F  | 101               | 13 | 3.741E-08        | "hit"            |
| <i>Irf7</i>          | 6           | 3M, 3F  | 97                | 15 | 7.896E-06        | "hit"            |
| <i>Abhd17a</i>       | 5           | 3M, 2F  | 70                | 15 | 7.520E-03        | "hit"            |
| <i>Grsf1</i>         | 6           | 4M, 2F  | -54               | 5  | 6.105E-11        | "hit"            |
| <i>BC017643</i>      | 9           | 4M, 5F  | -57               | 12 | 2.712E-04        | "hit"            |
| <i>Cybb</i>          | 5           | 2M, 3F  | -66               | 7  | 6.464E-12        | "hit"            |
| <i>Fam175b</i>       | 4           | 2F, 2M  | -69               | 11 | 1.682E-04        | "hit"            |
| <i>Bach2</i>         | 6           | 3M, 3F  | -72               | 9  | 5.092E-12        | "hit"            |
| <i>Ncf2</i>          | 5           | 3M, 2F  | -75               | 6  | 3.247E-11        | "hit"            |
| <i>Arhgef1</i>       | 4           | 2M, 2F  | -87               | 7  | 6.617E-09        | "hit"            |
| <i>Fbxo7</i>         | 4           | 1M, 3F  | -93               | 17 | 2.141E-05        | "hit"            |
| <i>Tbcl22a</i>       | 5           | 3M, 2F  | -94               | 10 | 0.000E+00        | "hit"            |
| <i>Entpd1</i>        | 4           | 1M, 3F  | -96               | 16 | 1.266E-06        | "hit"            |
| <i>Lrig1</i>         | 5           | 2M, 3F  | -97               | 11 | 1.904E-12        | "hit"            |
| <i>Hsp90aa1</i>      | 4           | 1M, 3F  | -102              | 13 | 3.616E-06        | "hit"            |
| <i>Cyba</i>          | 4           | 2M, 2F  | -106              | 8  | 0.000E+00        | "hit"            |
| <i>Nbeal2</i>        | 4           | 1M, 3F  | -125              | 13 | 0.000E+00        | "hit"            |
| <i>Spns2</i>         | 9           | 6M, 3F  | -155              | 7  | 0.000E+00        | "hit"            |
| <i>Apool</i>         | 2           | 1M, 1F  | -70               | 20 | 0.116            | "false positive" |
| <i>Arid1b</i>        | 4           | 2M, 2F  | -38               | 13 | 0.442            | "false positive" |
| <i>4931429L15Rik</i> | 3           | 3M      | -35               | 12 | 0.461            | "false positive" |
| <i>Uri1</i>          | 2           | 2M      | -72               | 27 | 0.768            | "false positive" |
| <i>Acer1</i>         | 5           | 3M, 2F  | -33               | 13 | 0.998            | "false positive" |
| <i>Adal</i>          | 5           | 5M      | -3                | 7  | 0.998            | "false positive" |
| <i>Atad3a</i>        | 3           | 2M, 1F  | -41               | 18 | 0.998            | "false positive" |
| <i>Csnklg3</i>       | 3           | 3M      | 25                | 12 | 0.998            | "false positive" |
| <i>Fbxo33</i>        | 3           | 3M      | 42                | 25 | 0.998            | "false positive" |
| <i>Gnb3</i>          | 5           | 4M, 1F  | 13                | 9  | 0.998            | "false positive" |
| <i>Ldlrad4</i>       | 8           | 4M, 4F  | 35                | 24 | 0.998            | "false positive" |
| <i>Rasa12</i>        | 3           | 3F      | -26               | 24 | 0.998            | "false positive" |
| <i>Smyd5</i>         | 4           | 2M, 2F  | -14               | 29 | 0.998            | "false positive" |
| <i>Tgm6</i>          | 2           | 1M, 1F  | -16               | 17 | 0.998            | "false positive" |
| <i>Tuft1</i>         | 2           | 2F      | -48               | 19 | 0.998            | "false positive" |
| <i>Zfyve28</i>       | 2           | 1M, 1F  | -16               | 29 | 0.998            | "false positive" |

|                      |   |        |     |    |       |                     |
|----------------------|---|--------|-----|----|-------|---------------------|
| <i>Lacc1</i>         | 5 | 3M, 2F | -57 | 15 | 0.016 | "repeated negative" |
| <i>Rbmx</i>          | 2 | 2F     | -49 | 14 | 0.113 | "repeated negative" |
| <i>Exoc3l2</i>       | 3 | 1M, 2F | -68 | 20 | 0.164 | "repeated negative" |
| <i>Mier1</i>         | 3 | 1M, 2F | -56 | 18 | 0.218 | "repeated negative" |
| <i>Zfp182</i>        | 3 | 2M, 1F | 37  | 13 | 0.363 | "repeated negative" |
| <i>Psat1</i>         | 2 | 2M     | -47 | 17 | 0.572 | "repeated negative" |
| <i>Psd95</i>         | 3 | 1M, 2F | 64  | 23 | 0.611 | "repeated negative" |
| <i>Natd1</i>         | 2 | 2F     | 79  | 29 | 0.7   | "repeated negative" |
| <i>Klh18</i>         | 3 | 1M, 2F | -68 | 28 | 0.743 | "repeated negative" |
| <i>Cd300lg</i>       | 2 | 1M, 1F | -68 | 26 | 0.958 | "repeated negative" |
| <i>Map3k1</i>        | 3 | 2M, 1F | -52 | 20 | 0.958 | "repeated negative" |
| <i>1110037F02Rik</i> | 2 | 1M, 1F | 28  | 26 | 0.998 | "repeated negative" |
| <i>2810417H13Rik</i> | 3 | 1M, 2F | -19 | 13 | 0.998 | "repeated negative" |
| <i>3110035E14Rik</i> | 2 | 2F     | 22  | 20 | 0.998 | "repeated negative" |
| <i>Abhd14a</i>       | 2 | 2M     | 44  | 20 | 0.998 | "repeated negative" |
| <i>Acaa1a</i>        | 2 | 1M, 1F | 10  | 31 | 0.998 | "repeated negative" |
| <i>Actl10</i>        | 3 | 2M, 1F | -9  | 13 | 0.998 | "repeated negative" |
| <i>Actr6</i>         | 2 | 2M     | 40  | 38 | 0.998 | "repeated negative" |
| <i>Akt2</i>          | 3 | 2M, 1F | 21  | 23 | 0.998 | "repeated negative" |
| <i>Ano10</i>         | 2 | 2F     | 21  | 16 | 0.998 | "repeated negative" |
| <i>Arsg</i>          | 3 | 1M, 2F | -13 | 25 | 0.998 | "repeated negative" |
| <i>Brd8</i>          | 3 | 2M, 1F | 3   | 24 | 0.998 | "repeated negative" |
| <i>Ccdc160</i>       | 2 | 1M, 1F | -37 | 37 | 0.998 | "repeated negative" |
| <i>Ccl22</i>         | 3 | 1M, 2F | 37  | 17 | 0.998 | "repeated negative" |
| <i>Cnot6</i>         | 2 | 1M, 1F | 21  | 26 | 0.998 | "repeated negative" |
| <i>Col4a3bp</i>      | 4 | 2M, 2F | 23  | 20 | 0.998 | "repeated negative" |
| <i>Copg</i>          | 5 | 3M, 2F | -2  | 14 | 0.998 | "repeated negative" |
| <i>Cpsf3</i>         | 3 | 2M, 1F | -19 | 17 | 0.998 | "repeated negative" |
| <i>Crip2</i>         | 2 | 1M, 1F | -5  | 8  | 0.998 | "repeated negative" |
| <i>Cyfp1</i>         | 3 | 1M, 2F | 17  | 20 | 0.998 | "repeated negative" |
| <i>Cyp3a11</i>       | 2 | 2F     | 30  | 15 | 0.998 | "repeated negative" |
| <i>D7Ert443e</i>     | 3 | 3M     | -4  | 15 | 0.998 | "repeated negative" |
| <i>Defb14</i>        | 2 | 2F     | 10  | 35 | 0.998 | "repeated negative" |
| <i>Dennd1c</i>       | 2 | 1M, 1F | -20 | 19 | 0.998 | "repeated negative" |
| <i>Dlg2</i>          | 4 | 2M, 2F | 6   | 17 | 0.998 | "repeated negative" |
| <i>Dlg3</i>          | 2 | 1M, 1F | 43  | 27 | 0.998 | "repeated negative" |
| <i>Ell2</i>          | 2 | 2M     | 31  | 21 | 0.998 | "repeated negative" |
| <i>Elmo1</i>         | 3 | 1M, 2F | 0   | 18 | 0.998 | "repeated negative" |
| <i>Enthd2</i>        | 2 | 1M, 1F | -7  | 12 | 0.998 | "repeated negative" |
| <i>Erp44</i>         | 2 | 1M, 1F | 7   | 19 | 0.998 | "repeated negative" |
| <i>Espn</i>          | 3 | 2M, 1F | -37 | 17 | 0.998 | "repeated negative" |
| <i>Fbxw26</i>        | 2 | 2M     | 37  | 24 | 0.998 | "repeated negative" |
| <i>Fnip2</i>         | 2 | 2M     | 10  | 16 | 0.998 | "repeated negative" |
| <i>Folr4</i>         | 2 | 2M     | -38 | 16 | 0.998 | "repeated negative" |
| <i>Gbf1</i>          | 2 | 1M, 1F | 33  | 25 | 0.998 | "repeated negative" |
| <i>Gdpd2</i>         | 2 | 2M     | -14 | 14 | 0.998 | "repeated negative" |
| <i>Glg1</i>          | 2 | 2F     | 15  | 22 | 0.998 | "repeated negative" |
| <i>Gm16432</i>       | 3 | 3M     | 17  | 14 | 0.998 | "repeated negative" |
| <i>Gpc5</i>          | 3 | 1M, 2F | -8  | 18 | 0.998 | "repeated negative" |
| <i>Gpr152</i>        | 2 | 1M, 1F | 18  | 18 | 0.998 | "repeated negative" |
| <i>Gtf2a1</i>        | 3 | 3M     | -26 | 19 | 0.998 | "repeated negative" |
| <i>Hacl1</i>         | 2 | 2F     | -35 | 28 | 0.998 | "repeated negative" |
| <i>Homez</i>         | 2 | 2M     | -26 | 15 | 0.998 | "repeated negative" |
| <i>Ido1</i>          | 5 | 2M, 3F | 22  | 16 | 0.998 | "repeated negative" |
| <i>Il10rb</i>        | 3 | 2M, 1F | -18 | 19 | 0.998 | "repeated negative" |

|                 |   |        |     |    |       |                     |
|-----------------|---|--------|-----|----|-------|---------------------|
| <i>Ii22ra1</i>  | 3 | 1M, 2F | 10  | 23 | 0.998 | "repeated negative" |
| <i>Irf5</i>     | 2 | 2F     | 13  | 15 | 0.998 | "repeated negative" |
| <i>Jhdm1d</i>   | 2 | 1M, 1F | 13  | 27 | 0.998 | "repeated negative" |
| <i>L3mbtl2</i>  | 2 | 2M, 4F | -14 | 7  | 0.998 | "repeated negative" |
| <i>Leprot</i>   | 3 | 2M, 1F | 18  | 19 | 0.998 | "repeated negative" |
| <i>Lgals7</i>   | 2 | 1M, 1F | -19 | 27 | 0.998 | "repeated negative" |
| <i>Lonrf3</i>   | 2 | 2M     | 25  | 21 | 0.998 | "repeated negative" |
| <i>Metrn1</i>   | 3 | 1M, 2F | 13  | 18 | 0.998 | "repeated negative" |
| <i>Mroh4</i>    | 2 | 2F     | 0   | 23 | 0.998 | "repeated negative" |
| <i>Myh14</i>    | 5 | 2M, 3F | 26  | 15 | 0.998 | "repeated negative" |
| <i>Myt1l</i>    | 2 | 1M, 1F | -38 | 25 | 0.998 | "repeated negative" |
| <i>Nfkb1</i>    | 2 | 1M, 1F | -7  | 22 | 0.998 | "repeated negative" |
| <i>Pabpc4</i>   | 2 | 2F     | 13  | 22 | 0.998 | "repeated negative" |
| <i>Pld3</i>     | 3 | 2M, 1F | -6  | 9  | 0.998 | "repeated negative" |
| <i>Plet1</i>    | 2 | 1M, 1F | 10  | 12 | 0.998 | "repeated negative" |
| <i>Pls3</i>     | 2 | 1M, 1F | -29 | 23 | 0.998 | "repeated negative" |
| <i>Ppp6c</i>    | 2 | 2F     | 36  | 24 | 0.998 | "repeated negative" |
| <i>Prrc2b</i>   | 2 | 2M     | 36  | 24 | 0.998 | "repeated negative" |
| <i>Prrt2</i>    | 2 | 2F     | 8   | 21 | 0.998 | "repeated negative" |
| <i>Pus10</i>    | 3 | 3M     | -5  | 8  | 0.998 | "repeated negative" |
| <i>Pwp1</i>     | 2 | 2M     | 23  | 15 | 0.998 | "repeated negative" |
| <i>Ralgapb</i>  | 3 | 2M, 1F | 15  | 20 | 0.998 | "repeated negative" |
| <i>Rassf1a</i>  | 3 | 1M, 2F | 24  | 20 | 0.998 | "repeated negative" |
| <i>Rhox13</i>   | 3 | 1M, 2F | 45  | 30 | 0.998 | "repeated negative" |
| <i>Rsad1</i>    | 2 | 1M, 1F | 48  | 23 | 0.998 | "repeated negative" |
| <i>Rspo4</i>    | 4 | 2M, 2F | 14  | 17 | 0.998 | "repeated negative" |
| <i>Sec1</i>     | 3 | 2M, 1F | -1  | 21 | 0.998 | "repeated negative" |
| <i>Sel1l</i>    | 2 | 1M, 1F | 23  | 25 | 0.998 | "repeated negative" |
| <i>Selk</i>     | 2 | 1M, 1F | -5  | 24 | 0.998 | "repeated negative" |
| <i>Sema7a</i>   | 3 | 1M, 2F | 6   | 20 | 0.998 | "repeated negative" |
| <i>Slc38a2</i>  | 2 | 1M, 1F | 2   | 24 | 0.998 | "repeated negative" |
| <i>Smpd4</i>    | 2 | 2F     | -3  | 14 | 0.998 | "repeated negative" |
| <i>Spink14</i>  | 2 | 2F     | -6  | 20 | 0.998 | "repeated negative" |
| <i>Stard8</i>   | 2 | 2F     | 11  | 23 | 0.998 | "repeated negative" |
| <i>Tatdn3</i>   | 2 | 2F     | 13  | 17 | 0.998 | "repeated negative" |
| <i>Tceal5</i>   | 6 | 3M, 3F | 15  | 13 | 0.998 | "repeated negative" |
| <i>Tgfb1i1</i>  | 2 | 1M, 1F | -31 | 24 | 0.998 | "repeated negative" |
| <i>Tmem126a</i> | 2 | 1M, 1F | 31  | 20 | 0.998 | "repeated negative" |
| <i>Tmem241</i>  | 4 | 3M, 1F | -3  | 10 | 0.998 | "repeated negative" |
| <i>Tmem241</i>  | 4 | 3M, 1F | -3  | 10 | 0.998 | "repeated negative" |
| <i>Tomm20l</i>  | 2 | 1M, 1F | 6   | 14 | 0.998 | "repeated negative" |
| <i>Trex1</i>    | 3 | 1M, 2F | -51 | 25 | 0.998 | "repeated negative" |
| <i>Trim29</i>   | 2 | 2F     | 7   | 27 | 0.998 | "repeated negative" |
| <i>Trim38</i>   | 2 | 1M, 1F | 8   | 19 | 0.998 | "repeated negative" |
| <i>Vps51</i>    | 2 | 1M, 1F | -22 | 18 | 0.998 | "repeated negative" |
| <i>Zbed5</i>    | 3 | 2M, 1F | -8  | 14 | 0.998 | "repeated negative" |
| <i>Zfp719</i>   | 3 | 1M, 2F | 49  | 21 | 0.998 | "repeated negative" |

**SI Table 3. Results of analysis of RNAseq data.** Differentially expressed genes in B16-F10-mCherry cells isolated from the lungs of *tm1a/tm1a* mice relative to those from +/+ mice 24 hours after administration (n=5 per genotype).

| Gene_name | Alternative gene names                                 | Gene ID            | Log2 Fold Change | Adjusted P value | Comments                                                                                                                                                                                                                                                                                                                                                                                                                                                                                                  |
|-----------|--------------------------------------------------------|--------------------|------------------|------------------|-----------------------------------------------------------------------------------------------------------------------------------------------------------------------------------------------------------------------------------------------------------------------------------------------------------------------------------------------------------------------------------------------------------------------------------------------------------------------------------------------------------|
| H2-Q7     | Q9; Ped; Qa7; Qa-2; Qa-7; H-2Q7                        | ENSMUSG00000060550 | 0.913229743      | 4.049E-03        | * Correction of defects responsible for impaired Qa-2 class Ib MHC expression on melanoma cells protects mice from tumor growth; B78H1 cells (a B16 mouse melanoma variant; all B16 cell lines show down-regulation of class I MHC expression) genetically manipulated to re-express Q9 Ag have reduced tumor potential in syngeneic B6 mice compared with TAP2-transfected parental melanoma. Both NK cells and CTLs appear to collaborate in restraining growth of Q9-positive tumors [PMID: 12707328]. |
| Glipr2    | GAPR1; GAPR-1; C9orf19                                 | ENSMUSG00000028480 | 0.95642786       | 3.656E-02        | * GLIPR-2 overexpression in HK-2 cells can potentiate EMT-like processes in this cell type through the ERK1/2 signaling pathway [PMID: 23516513].<br>* The plant pathogenesis related protein GLIPR-2 is highly expressed in fibrotic kidney and promotes epithelial to mesenchymal transition in vitro [PMID: 17055234].                                                                                                                                                                                 |
| Traf1     | EBI6; MGC:10353                                        | ENSMUSG00000026875 | 0.96642868       | 3.049E-02        | * ATPase inhibitory factor 1 (IF1) promoted Snai1 and VEGF expression by way of activating NF-κB signaling, which depended on the binding of TRAF1 to NF-κB-inducing kinase (NIK) and the disruption of NIK association with the TRAF2-cIAP2 complex. Suppression of the NF-κB pathway interfered with IF1-mediated EMT and invasion [PMID: 25042864].                                                                                                                                                    |
| Marcks1   | F52; MLP; MRP; MLP1; MACMARCKS                         | ENSMUSG00000047945 | 1.00910128       | 3.656E-02        | * MARCKSL1 expression is deregulated in a wider range of cancers than previously appreciated (upregulated) & increased MARCKSL1 expression in breast cancer is correlated with an increased risk for distant metastasis [PMID: 22751924].                                                                                                                                                                                                                                                                 |
| Ccl5      | SISd; eoCP; SCYA5; RANTES; TCP228; D17S136E; SIS-delta | ENSMUSG00000035042 | 1.010245092      | 3.630E-02        | * CCL5 promotes VEGF-dependent angiogenesis in human chondrosarcoma cells [PMID: 25301739].<br>* Patients with gastric adenocarcinoma had significantly higher serum CCL5 level compared with control group (P < .001); higher CCL5 levels were associated with lower histological differentiation (P < .001), higher depth of tumor invasion (P = .022), more frequent lymph nodes involvement (P = .028), advanced tumor stage (P = .002) and worse overall survival (P = .043) [PMID: 25301002].       |
| AW112010  | -                                                      | ENSMUSG00000075010 | 1.133723388      | 9.521E-04        | -                                                                                                                                                                                                                                                                                                                                                                                                                                                                                                         |
| Serpinb6b | NK13; Spi12; ovalbumin                                 | ENSMUSG00000042842 | 1.301065706      | 3.656E-02        | -                                                                                                                                                                                                                                                                                                                                                                                                                                                                                                         |
| Epsti1    | BRES1                                                  | ENSMUSG00000022014 | 1.331280959      | 1.320E-08        | * Experiments using nude mice demonstrated that the ectopic EPST11 granted the MCF-7 cells capability of both invasive growth in the breasts and metastasis to the lungs [PMID: 24096480].<br>* Evidence for a role of this molecule in the regulation of tumor cell properties and epithelial-mesenchymal transition (breast cancer) [PMID: 20133812].                                                                                                                                                   |
| Pla2g16   | AdPLA; HRSL3; HRASLS3; HREV107                         | ENSMUSG00000060675 | 1.523604066      | 3.656E-02        | * Overexpression of Pla2g16 increased the invasion of p53-null cells; Pla2g16 is a transcriptional target of mutant p53 that is required for metastasis [PMID: 25024203].                                                                                                                                                                                                                                                                                                                                 |

**SI Table 4. Details of antibodies used in this study.**

| <b>Fluorochrome</b> | <b>Antigen</b> | <b>Clone</b> | <b>Supplier</b>          | <b>Concentration (ug/ml)</b> |
|---------------------|----------------|--------------|--------------------------|------------------------------|
| PE                  | CD107a         | 1D4B         | BD Biosciences           | 0.4 ug/well                  |
| Pacific Blue        | CD11b          | M1/70.15     | Thermo Fisher Scientific | 0.200                        |
| PE-CF594            | CD19           | 1D3          | BD Biosciences           | 0.133                        |
| BV510               | CD19           | 6D5          | Biolegend                | 0.070                        |
| BV786               | CD19           | 1D3          | BD Biosciences           | 0.333                        |
| PE                  | CD25           | PC61         | Biolegend                | 0.400                        |
| PE                  | CD25           | 7D4          | Miltenyi Biotec          | 0.300                        |
| PE                  | CD27           | LG.3A10      | Biolegend                | 0.500                        |
| Pacific Blue        | CD3            | 17A2         | Biolegend                | 1.250                        |
| BV510               | CD4            | RM4-5        | Biolegend                | 0.100                        |
| VioGreen            | CD4            | GK1.5        | Miltenyi Biotec          | 0.375                        |
| FITC                | CD44           | IM7          | BD Biosciences           | 0.250                        |
| FITC                | CD44           | IM7.8.1      | Miltenyi Biotec          | 0.375                        |
| PerCP-Cy5.5         | CD45.1         | A20          | Biolegend                | 0.400                        |
| BUV737              | CD45.1         | A20          | BD Biosciences           | 0.500                        |
| Alexa Fluor 700     | CD45.2         | 104          | Biolegend                | 1.000                        |
| FITC                | CD49b          | DX5          | Biolegend                | 0.830                        |
| PE-Cy7              | CD62L          | MEL-14       | Biolegend                | 0.100                        |
| PE-CF594            | CD69           | H1.2F3       | BD Biosciences           | 0.400                        |
| VioBlue             | CD69           | H1-2F3       | Miltenyi Biotec          | 3.000                        |
| APC-H7              | CD8a           | 53-6.7       | BD Biosciences           | 1.000                        |
| PE-Cy7              | CD8a           | 53-6.7       | Biolegend                | 0.500                        |
| PerCP-Cy5.5         | CXCR3          | CXCR3-173    | Biolegend                | 0.500                        |
| BV650               | CXCR3          | CXCR3-173    | Biolegend                | 1.000                        |
| BV421               | IFN-g          | XMG1.2       | BD Biosciences           | 0.500                        |
| PE-Cy7              | KLRG1          | 2F1/KLRG1    | Biolegend                | 0.100                        |
| PE-Vio770           | KLRG1          | 2F1/KLRG1    | Miltenyi Biotec          | 0.375                        |
| Alexa Fluor 647     | NK1.1          | PK136        | Biolegend                | 1.000                        |
| APC                 | NK1.1          | PK136        | Miltenyi Biotec          | 0.500                        |
| PerCP-Cy5.5         | TCRb           | H57-597      | Biolegend                | 0.500                        |
| BV711               | TCRb           | H57-597      | BD Biosciences           | 0.400                        |
| APC                 | TCRgd          | GL3          | Biolegend                | 0.333                        |
| PerCP-Vio700        | TCRgd          | GL3          | Miltenyi Biotec          | 1.500                        |
| BV421               | TCRgd          | GL3          | Biolegend                | 0.400                        |
